# Supplementary material for: UPLC-MS-guided isolation of single ether linkage dimeric 2-(2-phenylethyl)chromones from Aquilaria sinensis
Source: Royal Society of Chemistry journal article supplement (doi:10.1039/c9ra02597a), 2019-01-01
Supplement: c9ra02597a1.pdf [file c9ra02597a1.pdf]

*Supporting Information*

## **UPLC-MS-guided isolated single ether linkage dimeric 2-(2-phenylethyl)chromones from *Aquilaria sinensis***

Tong-Dong Kuang<sup>a,b,1</sup>, Hui-Qin Chen<sup>a,b,1</sup>, Hao Wang<sup>a,b</sup>, Fan-Dong Kong<sup>a,b</sup>, Cai-Hong Cai<sup>a,b</sup>,  
Wen-Hua Dong<sup>a,b</sup>, Jing-Zhe Yuan<sup>a,b</sup>, Wen-Li Mei<sup>a,b,\*</sup>, Hao-Fu Dai<sup>a,b,\*</sup>

<sup>a</sup> *Hainan Engineering Research Center of Agarwood, Institute of Tropical Bioscience and Biotechnology, Chinese Academy of Tropical Agricultural Sciences, Haikou 571101, PR China*

<sup>b</sup> *Hainan Key laboratory for research and development of natural products from Li folk medicine, Institute of Tropical Bioscience and Biotechnology, Chinese Academy of Tropical Agricultural Sciences, Haikou 571101, PR China*

\* Corresponding authors.

*E-mail address: [meiwenli@itbb.org.cn](mailto:meiwenli@itbb.org.cn) (W.L. Mei); [daihaofu@itbb.org.cn](mailto:daihaofu@itbb.org.cn) (H.F. Dai)*

<sup>1</sup> These authors contributed equally to this work.

|                    |                                                                                            |    |
|--------------------|--------------------------------------------------------------------------------------------|----|
| <b>Figure S1.</b>  | $^1\text{H}$ NMR spectrum (500 MHz) of compound <b>1</b> in $\text{CD}_3\text{OD}$ .       | 5  |
| <b>Figure S2.</b>  | $^{13}\text{C}$ NMR spectrum (125 MHz) of compound <b>1</b> in $\text{CD}_3\text{OD}$ .    | 6  |
| <b>Figure S3.</b>  | $^1\text{H}$ - $^1\text{H}$ COSY spectrum of compound <b>1</b> in $\text{CD}_3\text{OD}$ . | 7  |
| <b>Figure S4.</b>  | HSQC spectrum of compound <b>1</b> in $\text{CD}_3\text{OD}$ .                             | 8  |
| <b>Figure S5.</b>  | HMBC spectrum of compound <b>1</b> in $\text{CD}_3\text{OD}$ .                             | 9  |
| <b>Figure S6.</b>  | ROESY spectrum of compound <b>1</b> in $\text{CD}_3\text{OD}$ .                            | 10 |
| <b>Figure S7.</b>  | HRESIMS spectrum of compound <b>1</b> .                                                    | 11 |
| <b>Figure S8.</b>  | IR spectrum of compound <b>1</b> .                                                         | 12 |
|                    |                                                                                            |    |
| <b>Figure S9.</b>  | $^1\text{H}$ NMR spectrum (500 MHz) of compound <b>2</b> in $\text{CD}_3\text{OD}$ .       | 13 |
| <b>Figure S10.</b> | $^{13}\text{C}$ NMR spectrum (125 MHz) of compound <b>2</b> in $\text{CD}_3\text{OD}$ .    | 14 |
| <b>Figure S11.</b> | $^1\text{H}$ - $^1\text{H}$ COSY spectrum of compound <b>2</b> in $\text{CD}_3\text{OD}$ . | 15 |
| <b>Figure S12.</b> | HSQC spectrum of compound <b>2</b> in $\text{CD}_3\text{OD}$ .                             | 16 |
| <b>Figure S13.</b> | HMBC spectrum of compound <b>2</b> in $\text{CD}_3\text{OD}$ .                             | 17 |
| <b>Figure S14.</b> | ROESY spectrum of compound <b>2</b> in $\text{CD}_3\text{OD}$ .                            | 18 |
| <b>Figure S15.</b> | HRESIMS spectrum of compound <b>2</b> .                                                    | 19 |
| <b>Figure S16.</b> | IR spectrum of compound <b>2</b> .                                                         | 20 |
|                    |                                                                                            |    |
| <b>Figure S17.</b> | $^1\text{H}$ NMR spectrum (500 MHz) of compound <b>3</b> in $\text{DMSO-}d_6$ .            | 21 |
| <b>Figure S18.</b> | $^{13}\text{C}$ NMR spectrum (125 MHz) of compound <b>3</b> in $\text{DMSO-}d_6$ .         | 22 |
| <b>Figure S19.</b> | $^1\text{H}$ - $^1\text{H}$ COSY spectrum of compound <b>3</b> in $\text{DMSO-}d_6$ .      | 23 |
| <b>Figure S20.</b> | HSQC spectrum of compound <b>3</b> in $\text{DMSO-}d_6$ .                                  | 24 |
| <b>Figure S21.</b> | HMBC spectrum of compound <b>3</b> in $\text{DMSO-}d_6$ .                                  | 25 |
| <b>Figure S22.</b> | ROESY spectrum of compound <b>3</b> in $\text{DMSO-}d_6$ .                                 | 26 |
| <b>Figure S23.</b> | HRESIMS spectrum of compound <b>3</b> .                                                    | 27 |
| <b>Figure S24.</b> | IR spectrum of compound <b>3</b> .                                                         | 28 |
|                    |                                                                                            |    |
| <b>Figure S25.</b> | $^1\text{H}$ NMR spectrum (600 MHz) of compound <b>4</b> in $\text{CD}_3\text{OD}$ .       | 29 |
| <b>Figure S26.</b> | DEPTQ spectrum (150 MHz) of compound <b>4</b> in $\text{CD}_3\text{OD}$ .                  | 30 |
| <b>Figure S27.</b> | $^1\text{H}$ - $^1\text{H}$ COSY spectrum of compound <b>4</b> in $\text{CD}_3\text{OD}$ . | 31 |
| <b>Figure S28.</b> | HSQC spectrum of compound <b>4</b> in $\text{CD}_3\text{OD}$ .                             | 32 |
| <b>Figure S29.</b> | HMBC spectrum of compound <b>4</b> in $\text{CD}_3\text{OD}$ .                             | 33 |
| <b>Figure S30.</b> | ROESY spectrum of compound <b>4</b> in $\text{CD}_3\text{OD}$ .                            | 34 |
| <b>Figure S31.</b> | HRESIMS spectrum of compound <b>4</b> .                                                    | 35 |
| <b>Figure S32.</b> | IR spectrum of compound <b>4</b> .                                                         | 36 |
|                    |                                                                                            |    |
| <b>Figure S33.</b> | $^1\text{H}$ NMR spectrum (500 MHz) of compound <b>5</b> in $\text{CD}_3\text{OD}$ .       | 37 |
| <b>Figure S34.</b> | $^{13}\text{C}$ NMR spectrum (125 MHz) of compound <b>5</b> in $\text{CD}_3\text{OD}$ .    | 38 |
| <b>Figure S35.</b> | $^1\text{H}$ - $^1\text{H}$ COSY spectrum of compound <b>5</b> in $\text{CD}_3\text{OD}$ . | 39 |
| <b>Figure S36.</b> | HSQC spectrum of compound <b>5</b> in $\text{CD}_3\text{OD}$ .                             | 40 |

|                                                                                                                  |    |
|------------------------------------------------------------------------------------------------------------------|----|
| <b>Figure S37.</b> HMBC spectrum of compound <b>5</b> in CD <sub>3</sub> OD. ....                                | 41 |
| <b>Figure S38.</b> ROESY spectrum of compound <b>5</b> in CD <sub>3</sub> OD. ....                               | 42 |
| <b>Figure S39.</b> HRESIMS spectrum of compound <b>5</b> . ....                                                  | 43 |
| <b>Figure S40.</b> IR spectrum of compound <b>5</b> . ....                                                       | 44 |
| <b>Figure S41.</b> <sup>1</sup> H NMR spectrum (500 MHz) of compound <b>6</b> in CD <sub>3</sub> OD. ....        | 45 |
| <b>Figure S42.</b> <sup>13</sup> C NMR spectrum (125 MHz) of compound <b>6</b> in CD <sub>3</sub> OD. ....       | 46 |
| <b>Figure S43.</b> <sup>1</sup> H- <sup>1</sup> H COSY spectrum of compound <b>6</b> in CD <sub>3</sub> OD. .... | 47 |
| <b>Figure S44.</b> HSQC spectrum of compound <b>6</b> in CD <sub>3</sub> OD. ....                                | 48 |
| <b>Figure S45.</b> HMBC spectrum of compound <b>6</b> in CD <sub>3</sub> OD. ....                                | 49 |
| <b>Figure S46.</b> ROESY spectrum of compound <b>6</b> in CD <sub>3</sub> OD. ....                               | 50 |
| <b>Figure S47.</b> HRESIMS spectrum of compound <b>6</b> . ....                                                  | 51 |
| <b>Figure S48.</b> IR spectrum of compound <b>6</b> . ....                                                       | 52 |
| <b>Figure S49.</b> <sup>1</sup> H NMR spectrum (500 MHz) of compound <b>7</b> in CD <sub>3</sub> OD. ....        | 53 |
| <b>Figure S50.</b> <sup>13</sup> C NMR spectrum (125 MHz) of compound <b>7</b> in CD <sub>3</sub> OD. ....       | 54 |
| <b>Figure S51.</b> <sup>1</sup> H- <sup>1</sup> H COSY spectrum of compound <b>7</b> in CD <sub>3</sub> OD. .... | 55 |
| <b>Figure S52.</b> HSQC spectrum of compound <b>7</b> in CD <sub>3</sub> OD. ....                                | 56 |
| <b>Figure S53.</b> HMBC spectrum of compound <b>7</b> in CD <sub>3</sub> OD. ....                                | 57 |
| <b>Figure S54.</b> ROESY spectrum of compound <b>7</b> in CD <sub>3</sub> OD. ....                               | 58 |
| <b>Figure S55.</b> HRESIMS spectrum of compound <b>7</b> . ....                                                  | 59 |
| <b>Figure S56.</b> IR spectrum of compound <b>7</b> . ....                                                       | 60 |
| <b>Figure S57.</b> <sup>1</sup> H NMR spectrum (600 MHz) of compound <b>8</b> in CD <sub>3</sub> OD. ....        | 61 |
| <b>Figure S58.</b> <sup>13</sup> C NMR spectrum (150 MHz) of compound <b>8</b> in CD <sub>3</sub> OD. ....       | 62 |
| <b>Figure S59.</b> <sup>1</sup> H- <sup>1</sup> H COSY spectrum of compound <b>8</b> in CD <sub>3</sub> OD. .... | 63 |
| <b>Figure S60.</b> HSQC spectrum of compound <b>8</b> in CD <sub>3</sub> OD. ....                                | 64 |
| <b>Figure S61.</b> HMBC spectrum of compound <b>8</b> in CD <sub>3</sub> OD. ....                                | 65 |
| <b>Figure S62.</b> NOESY spectrum of compound <b>8</b> in CD <sub>3</sub> OD. ....                               | 66 |
| <b>Figure S63.</b> HRESIMS spectrum of compound <b>8</b> . ....                                                  | 67 |
| <b>Figure S64.</b> IR spectrum of compound <b>8</b> . ....                                                       | 68 |
| <b>Figure S65.</b> <sup>1</sup> H NMR spectrum (500 MHz) of compound <b>9</b> in CD <sub>3</sub> OD. ....        | 69 |
| <b>Figure S66.</b> <sup>13</sup> C NMR spectrum (125 MHz) of compound <b>9</b> in CD <sub>3</sub> OD. ....       | 70 |
| <b>Figure S67.</b> <sup>1</sup> H- <sup>1</sup> H COSY spectrum of compound <b>9</b> in CD <sub>3</sub> OD. .... | 71 |
| <b>Figure S68.</b> HSQC spectrum of compound <b>9</b> in CD <sub>3</sub> OD. ....                                | 72 |
| <b>Figure S69.</b> HMBC spectrum of compound <b>9</b> in CD <sub>3</sub> OD. ....                                | 73 |
| <b>Figure S70.</b> ROESY spectrum of compound <b>9</b> in CD <sub>3</sub> OD. ....                               | 74 |
| <b>Figure S71.</b> HRESIMS spectrum of compound <b>9</b> . ....                                                  | 75 |
| <b>Figure S72.</b> IR spectrum of compound <b>9</b> . ....                                                       | 76 |

|                                                                                                                   |    |
|-------------------------------------------------------------------------------------------------------------------|----|
| <b>Figure S73.</b> <sup>1</sup> H NMR spectrum (500 MHz) of compound <b>10</b> in CD <sub>3</sub> OD. ....        | 77 |
| <b>Figure S74.</b> <sup>13</sup> C NMR spectrum (125 MHz) of compound <b>10</b> in CD <sub>3</sub> OD. ....       | 78 |
| <b>Figure S75.</b> <sup>1</sup> H- <sup>1</sup> H COSY spectrum of compound <b>10</b> in CD <sub>3</sub> OD. .... | 79 |
| <b>Figure S76.</b> HSQC spectrum of compound <b>10</b> in CD <sub>3</sub> OD. ....                                | 80 |
| <b>Figure S77.</b> HMBC spectrum of compound <b>10</b> in CD <sub>3</sub> OD. ....                                | 81 |
| <b>Figure S78.</b> ROESY spectrum of compound <b>10</b> in CD <sub>3</sub> OD. ....                               | 82 |
| <b>Figure S79.</b> HRESIMS spectrum of compound <b>10</b> . ....                                                  | 83 |
| <b>Figure S80.</b> IR spectrum of compound <b>10</b> . ....                                                       | 84 |
| <b>Figure S81.</b> <sup>1</sup> H NMR spectrum (500 MHz) of compound <b>11</b> in CD <sub>3</sub> OD. ....        | 85 |
| <b>Figure S82.</b> <sup>13</sup> C NMR spectrum (125 MHz) of compound <b>11</b> in CD <sub>3</sub> OD. ....       | 86 |
| <b>Figure S83.</b> <sup>1</sup> H- <sup>1</sup> H COSY spectrum of compound <b>11</b> in CD <sub>3</sub> OD. .... | 87 |
| <b>Figure S84.</b> HSQC spectrum of compound <b>11</b> in CD <sub>3</sub> OD. ....                                | 88 |
| <b>Figure S85.</b> HMBC spectrum of compound <b>11</b> in CD <sub>3</sub> OD. ....                                | 89 |
| <b>Figure S86.</b> ROESY spectrum of compound <b>11</b> in CD <sub>3</sub> OD. ....                               | 90 |
| <b>Figure S87.</b> HRESIMS spectrum of compound <b>11</b> . ....                                                  | 91 |
| <b>Figure S88.</b> IR spectrum of compound <b>11</b> . ....                                                       | 92 |

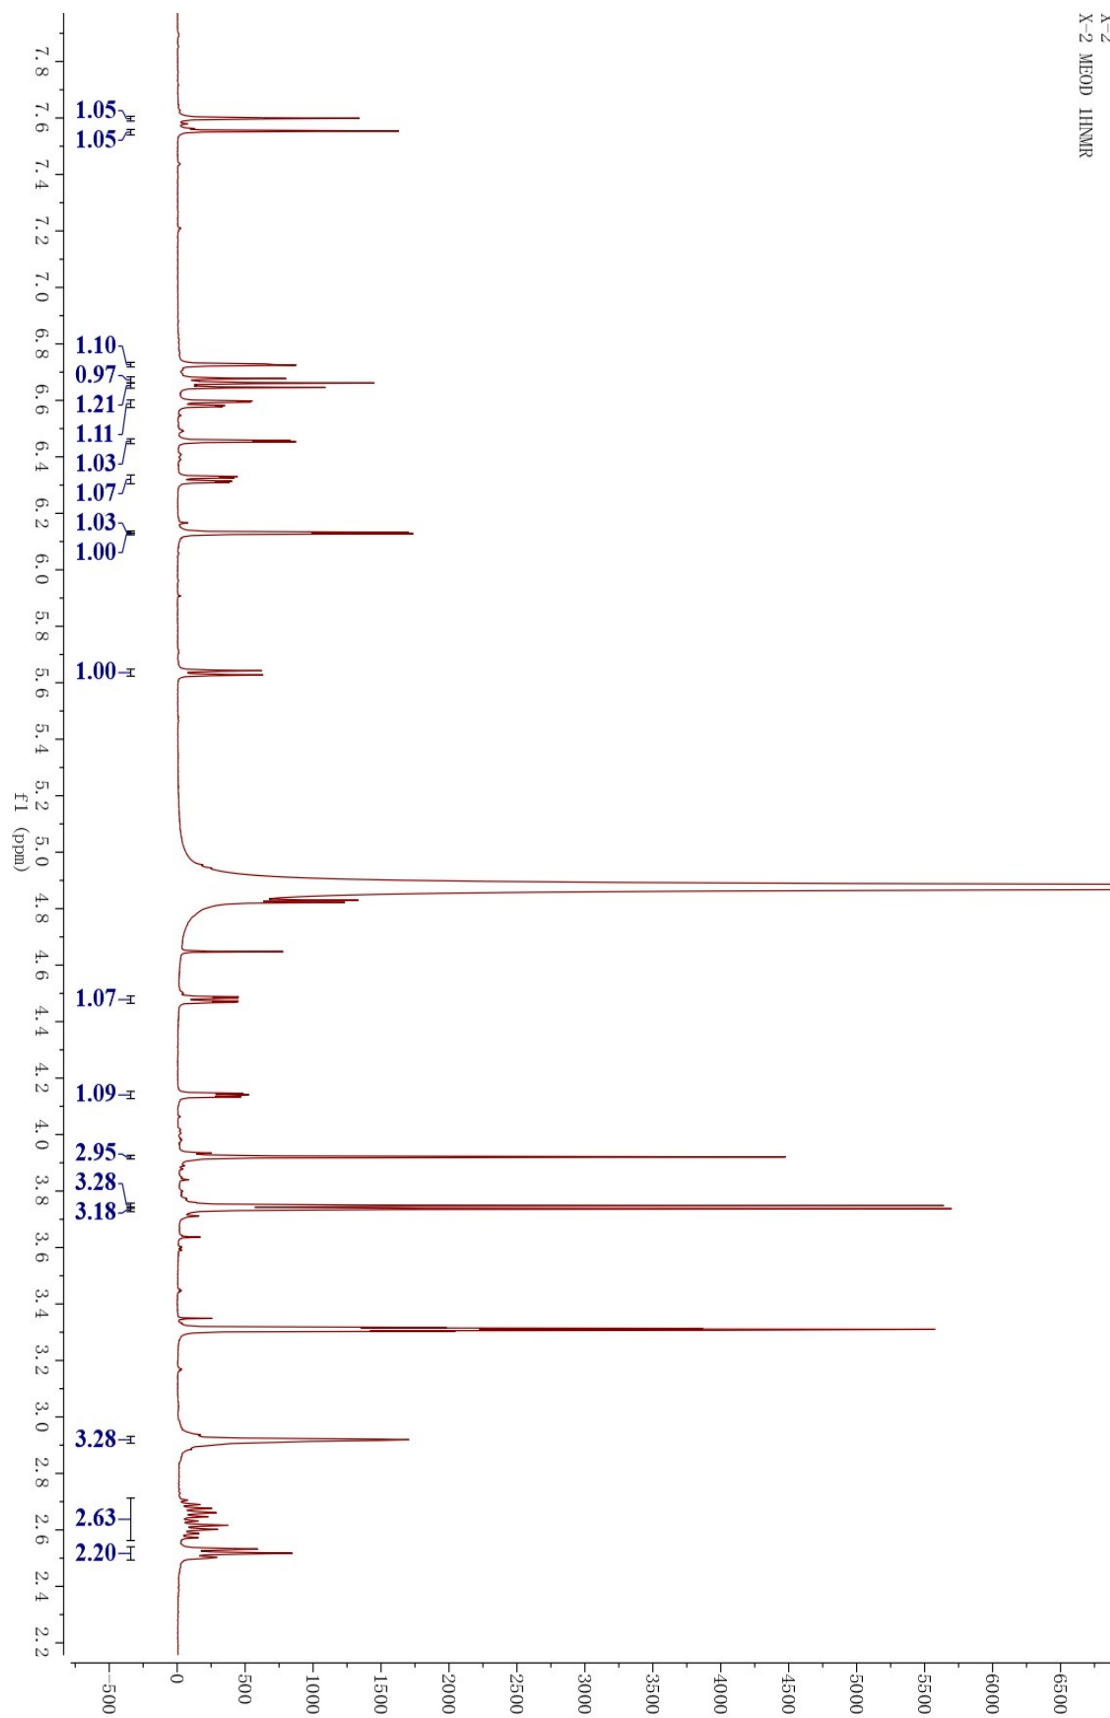

**Figure S1.** <sup>1</sup>H NMR spectrum (500 MHz) of compound 1 in CD<sub>3</sub>OD.

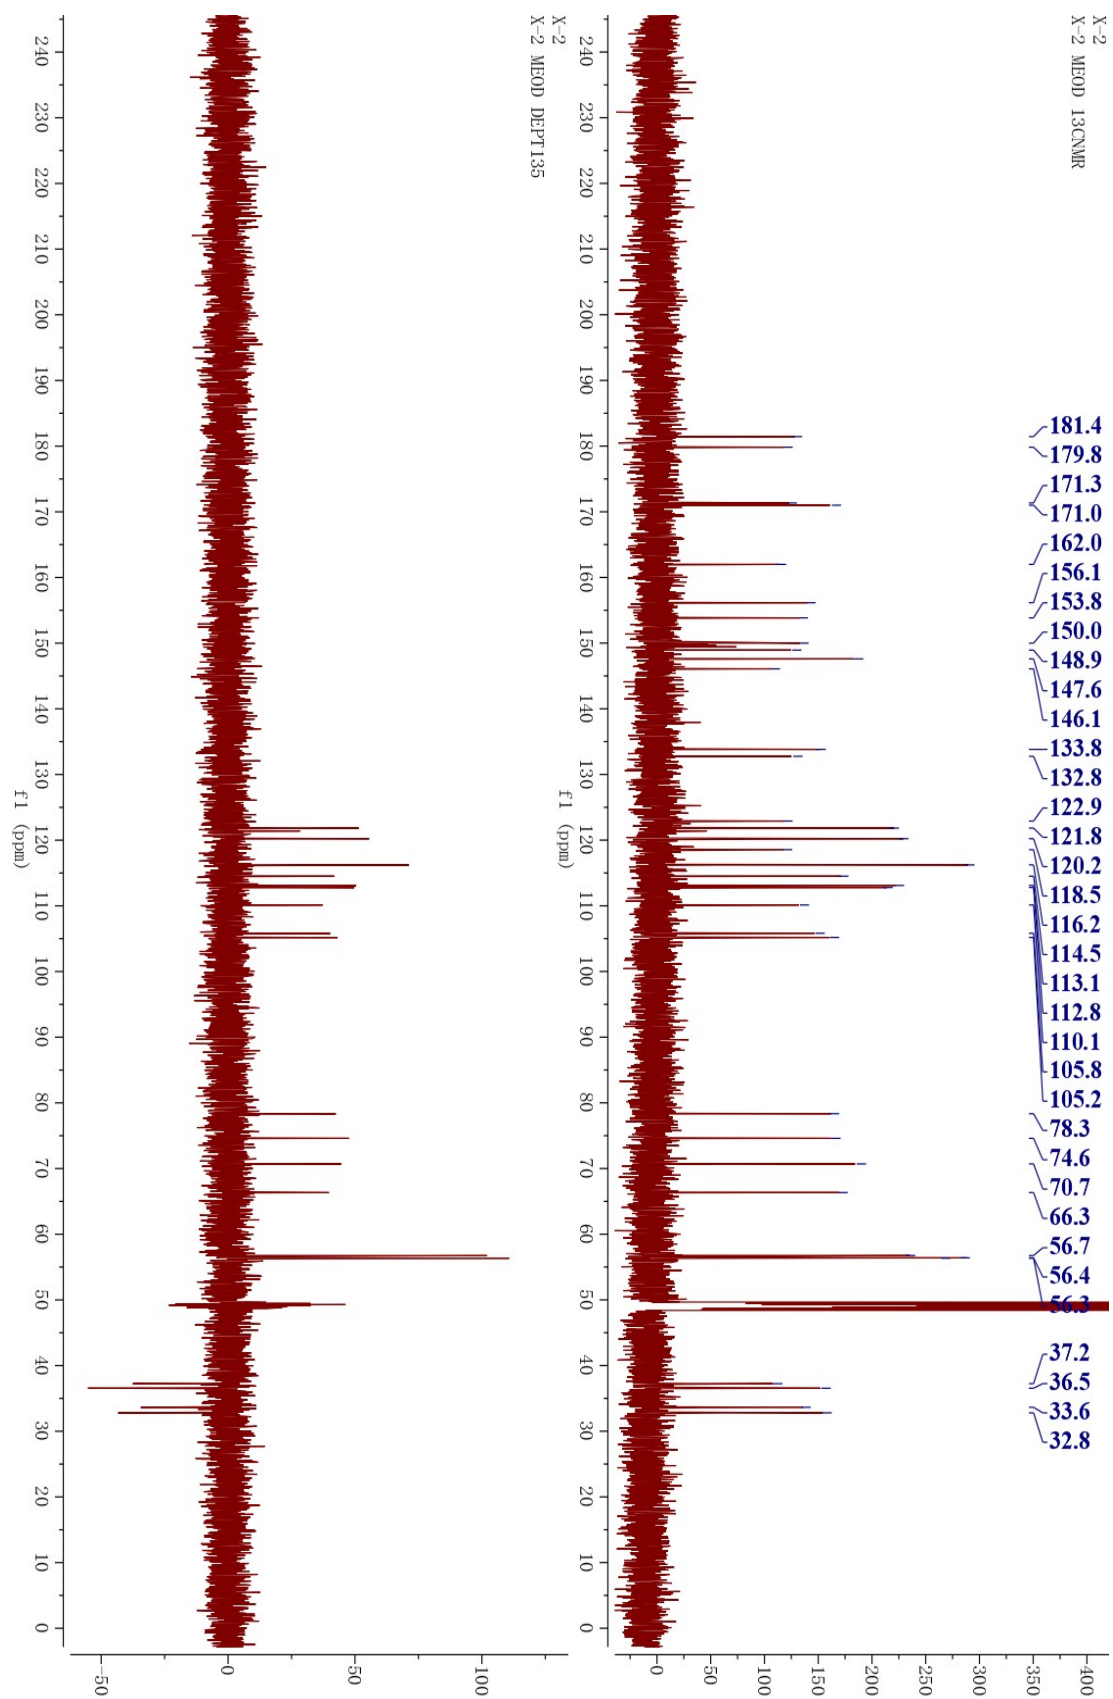

**Figure S2.**  $^{13}\text{C}$  NMR spectrum (125 MHz) of compound **1** in  $\text{CD}_3\text{OD}$ .

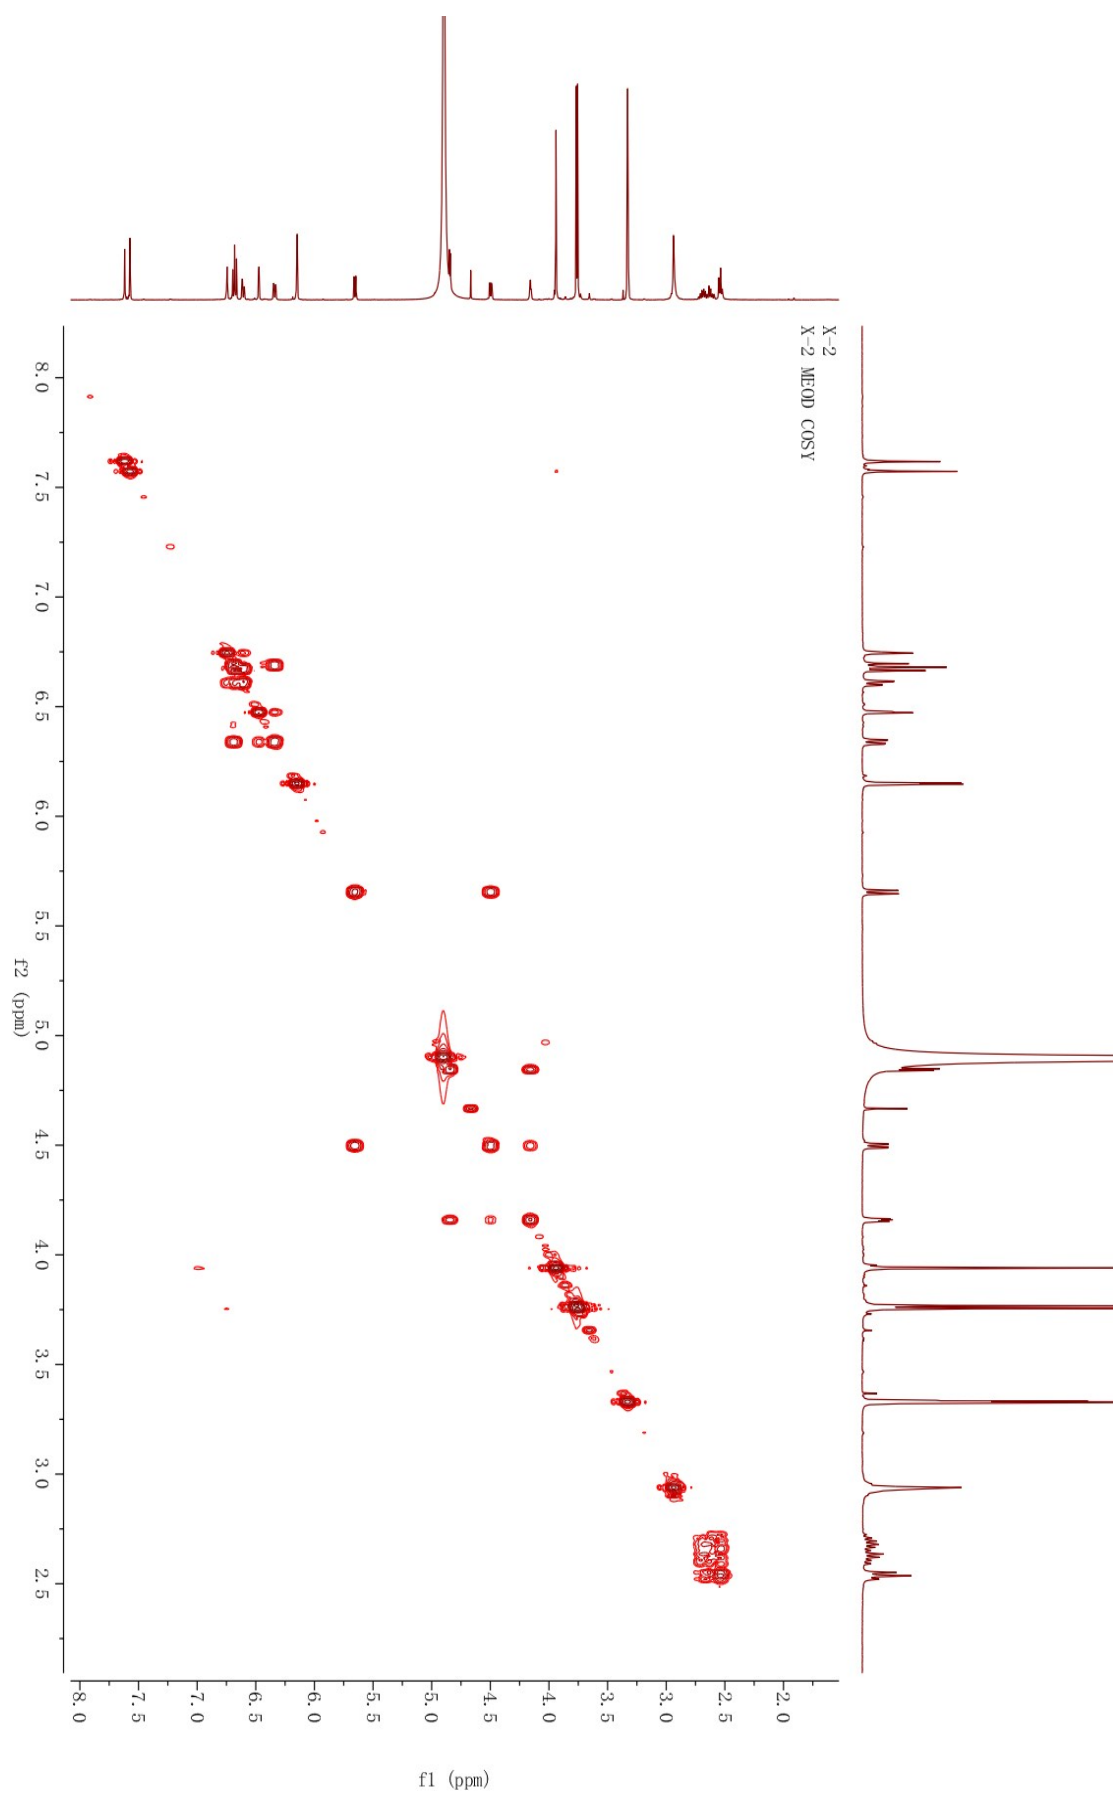

**Figure S3.**  $^1\text{H}$ - $^1\text{H}$  COSY spectrum of compound **1** in  $\text{CD}_3\text{OD}$ .

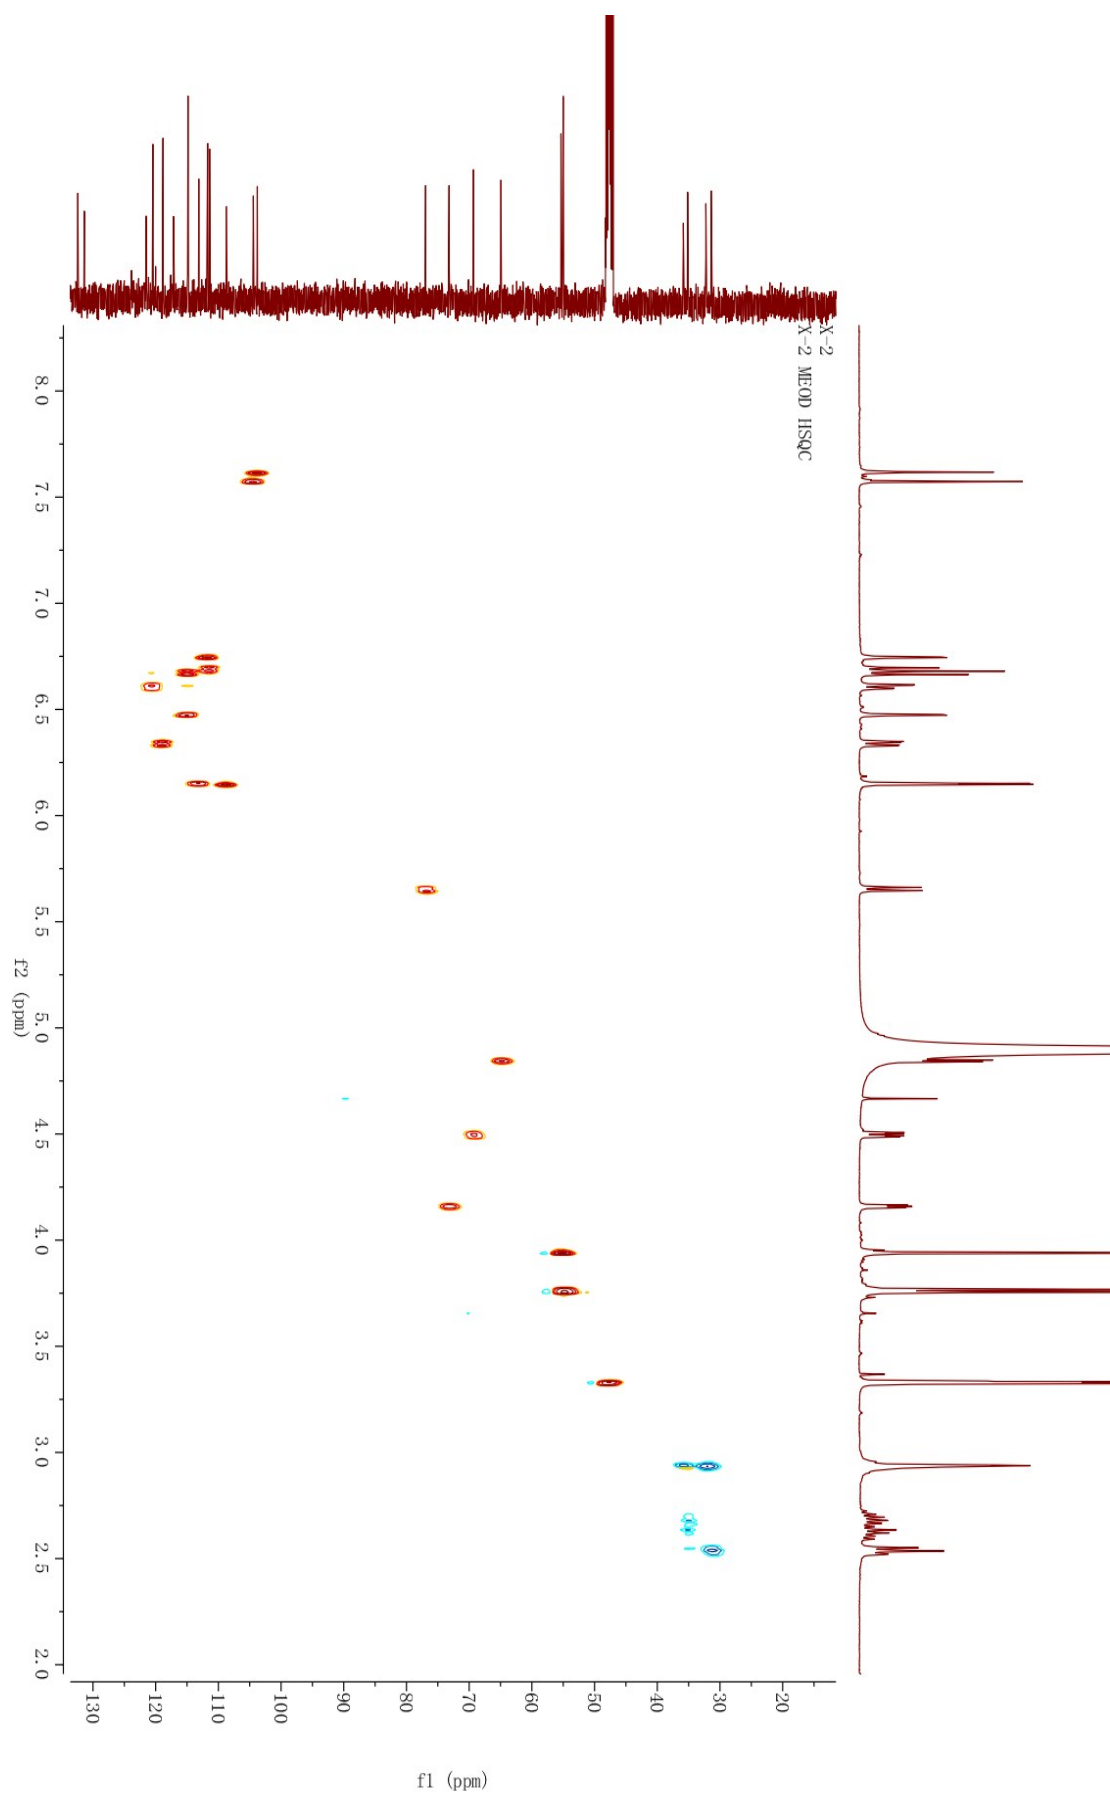

**Figure S4.** HSQC spectrum of compound **1** in CD<sub>3</sub>OD.



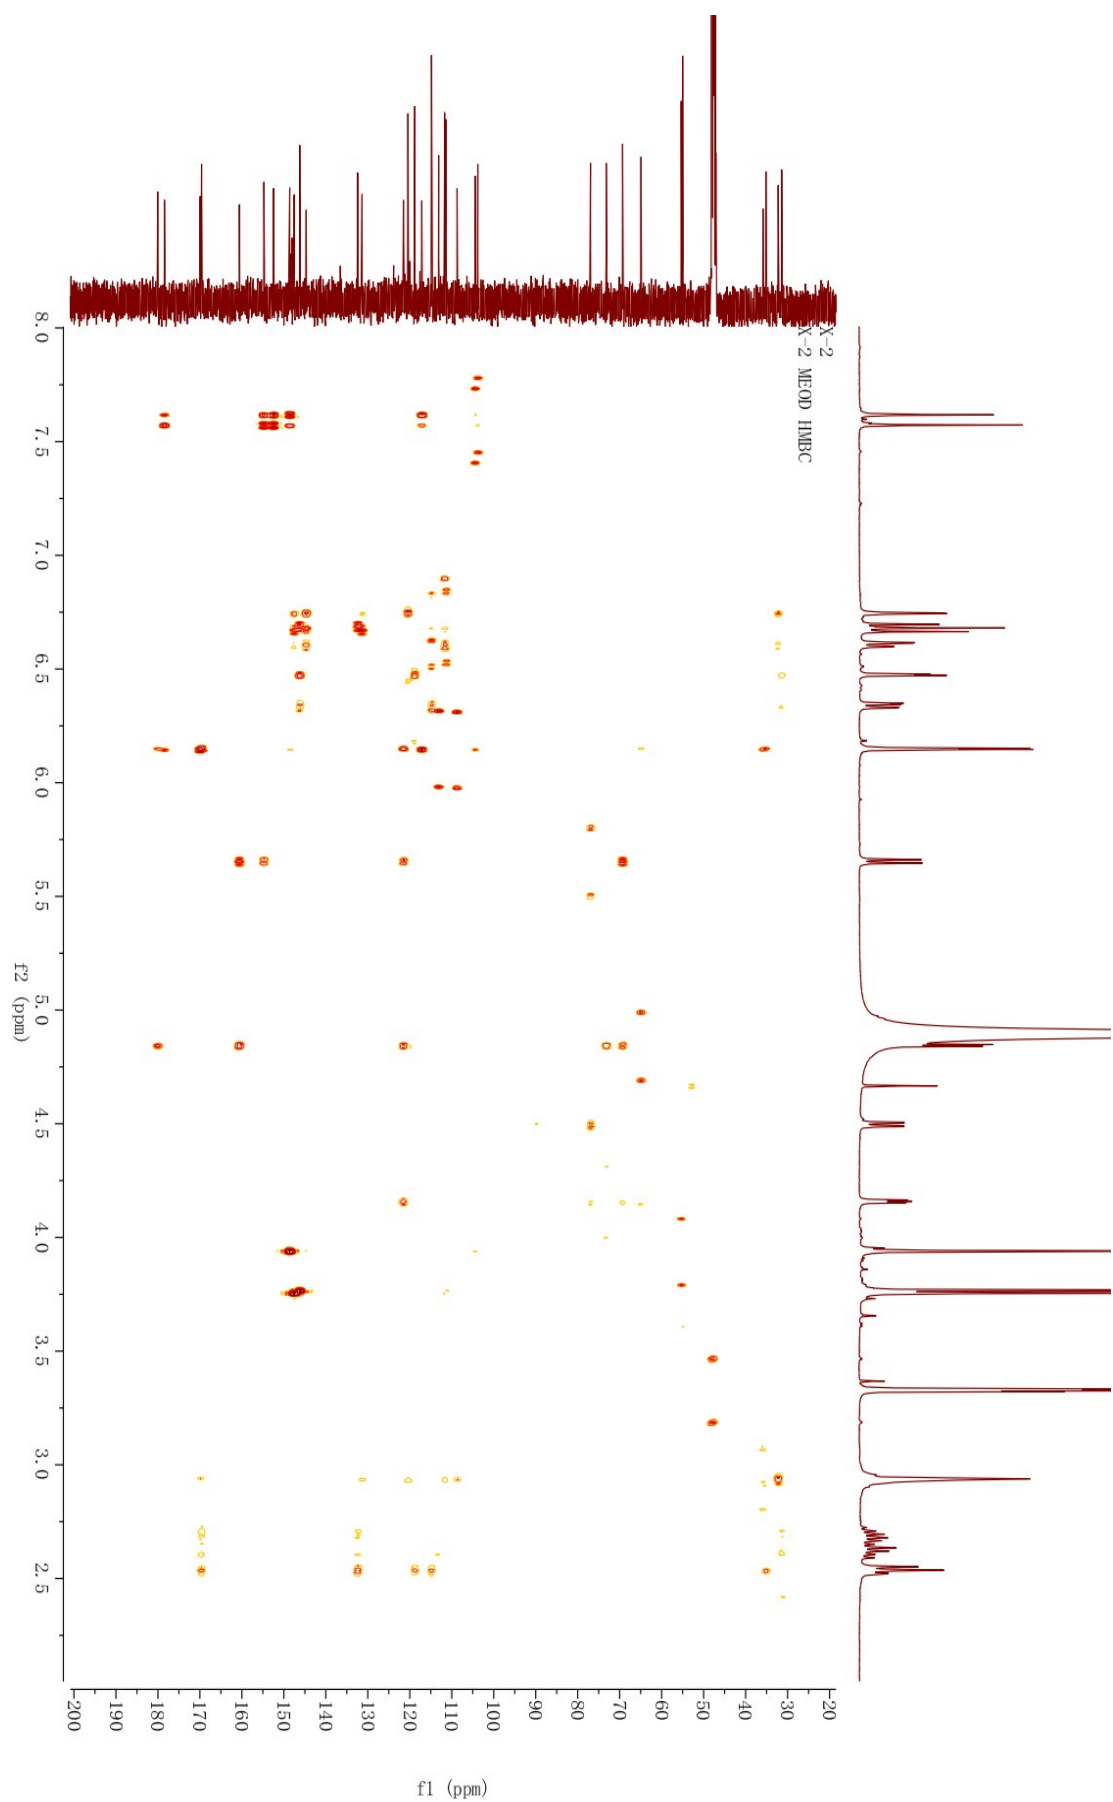

**Figure S5.** HMBC spectrum of compound **1** in CD<sub>3</sub>OD.

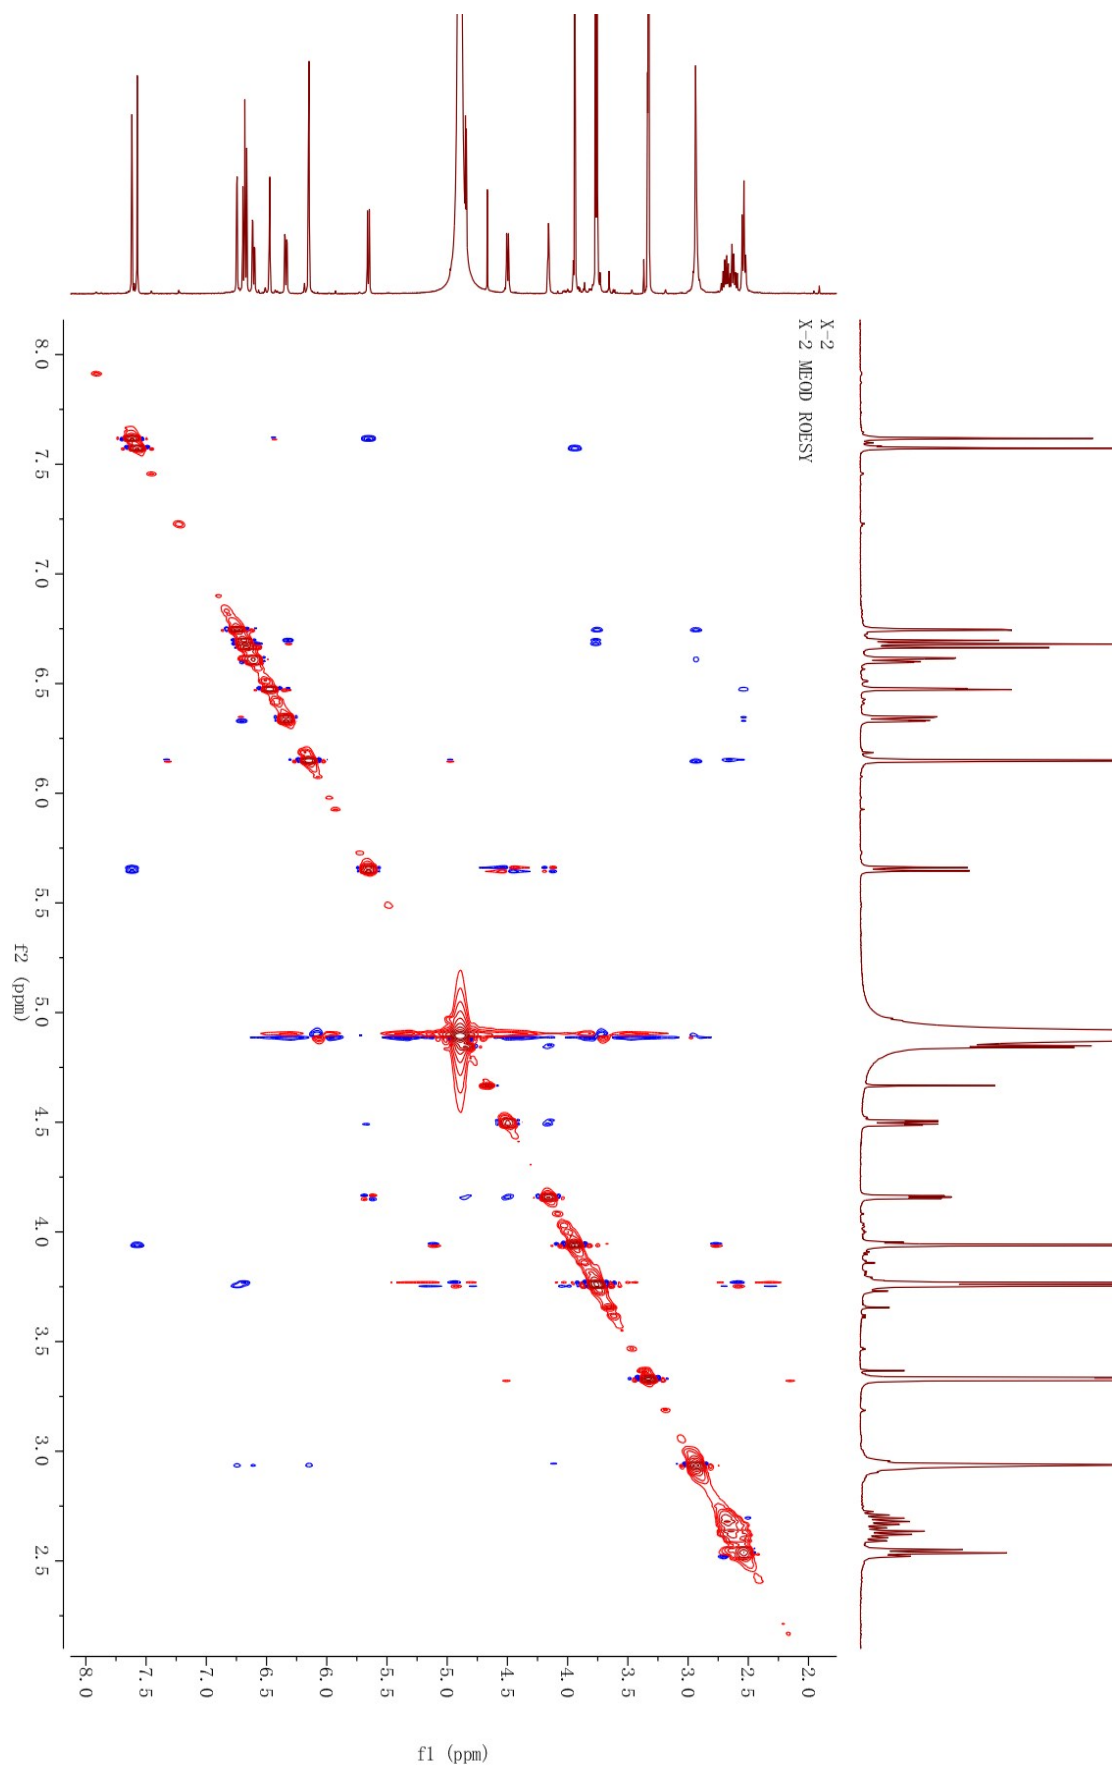

**Figure S6.** ROESY spectrum of compound **1** in CD<sub>3</sub>OD.

## Compound Spectrum SmartFormula Report

**Analysis Info**

Analysis Name D:\Data\A501\Wanghui\X-2.d  
 Method DirectInfusion - MS - positive.m  
 Sample Name kfd-8-25  
 Comment

Acquisition Date 2017-12-15 17:27:07

Operator Demo User  
 Instrument compact 8255754.20156

**Acquisition Parameter**

|             |            |                      |          |                  |           |
|-------------|------------|----------------------|----------|------------------|-----------|
| Source Type | ESI        | Ion Polarity         | Positive | Set Nebulizer    | 0.4 Bar   |
| Focus       | Not active | Set Capillary        | 4500 V   | Set Dry Heater   | 180 °C    |
| Scan Begin  | 50 m/z     | Set End Plate Offset | -500 V   | Set Dry Gas      | 4.0 l/min |
| Scan End    | 1300 m/z   | Set Charging Voltage | 2000 V   | Set Divert Valve | Source    |
|             |            | Set Corona           | 0 nA     | Set APCI Heater  | 0 °C      |

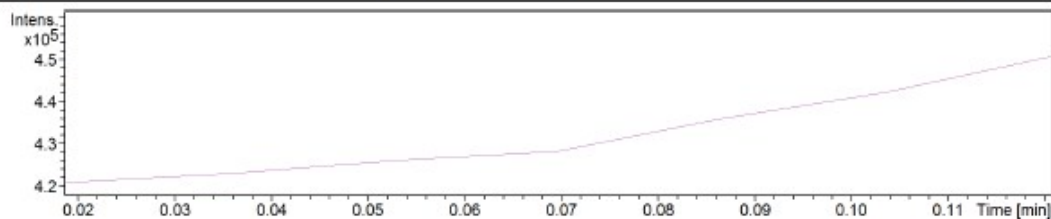
**+MS, 0.1min #6**
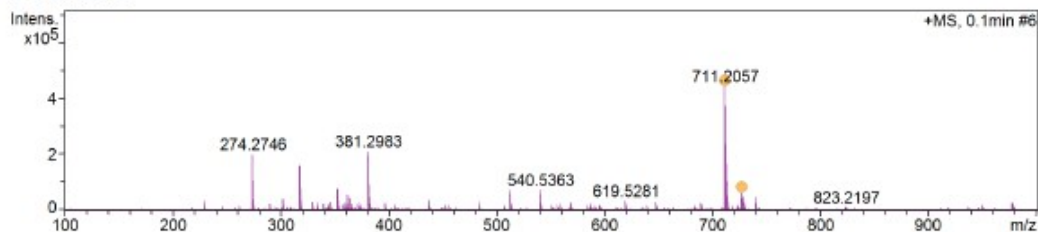

| # | Ion Formula   | m/z      | err [mDa] | err [ppm] | mSigma | rdb  | e <sup>-</sup> Conf | N-Rule |
|---|---------------|----------|-----------|-----------|--------|------|---------------------|--------|
| 1 | C37H23N14O3   | 711.2072 | 1.5       | 2.1       | 244.3  | 34.0 | even                | ok     |
| 1 | C39H28N8NaO5  | 711.2075 | 1.8       | 2.5       | 242.4  | 30.0 | even                | ok     |
| 1 | C36H32KN8O6   | 711.2078 | 1.9       | 2.7       | 211.7  | 25.0 | even                | ok     |
| 1 | C39H23N10O6   | 727.1797 | -1.1      | -1.6      | 248.8  | 34.0 | even                | ok     |
| 1 | C38H20N14NaO2 | 727.1788 | -2.2      | -3.0      | 249.0  | 36.0 | even                | ok     |
| 1 | C39H28KN8O5   | 727.1814 | 0.6       | 0.9       | 202.2  | 30.0 | even                | ok     |
| 2 | C39H35O13     | 711.2072 | 1.5       | 2.1       | 250.9  | 23.0 | even                | ok     |
| 2 | C38H32N4NaO9  | 711.2061 | 0.5       | 0.6       | 252.4  | 25.0 | even                | ok     |
| 2 | C35H36KN4O10  | 711.2063 | 0.6       | 0.9       | 221.3  | 20.0 | even                | ok     |
| 2 | C36H15N20     | 727.1783 | -2.5      | -3.4      | 251.1  | 40.0 | even                | ok     |
| 2 | C38H32KN4O9   | 727.1801 | -0.7      | -1.0      | 211.1  | 25.0 | even                | ok     |
| 3 | C36H27N10O7   | 711.2059 | 0.2       | 0.3       | 254.2  | 29.0 | even                | ok     |
| 3 | C35H24N14NaO3 | 711.2048 | -0.9      | -1.3      | 255.8  | 31.0 | even                | ok     |
| 3 | C38H27N6O10   | 727.1783 | -2.5      | -3.4      | 255.8  | 29.0 | even                | ok     |
| 3 | C35H24KN14O3  | 727.1787 | -2.1      | -2.8      | 214.3  | 31.0 | even                | ok     |
| 4 | C35H31N6O11   | 711.2045 | -1.2      | -1.6      | 264.1  | 24.0 | even                | ok     |
| 4 | C37H36NaO13   | 711.2048 | -0.9      | -1.2      | 262.4  | 20.0 | even                | ok     |
| 4 | C37H36KO13    | 727.1787 | -2.0      | -2.8      | 220.1  | 20.0 | even                | ok     |

**+MS, 0.1min #5**

X-2.d

Bruker Compass DataAnalysis 4.4

printed: 2017-12-19 11:50:21

by: demo

Page 1 of 2

**Figure S7.** HRESIMS spectrum of compound 1.

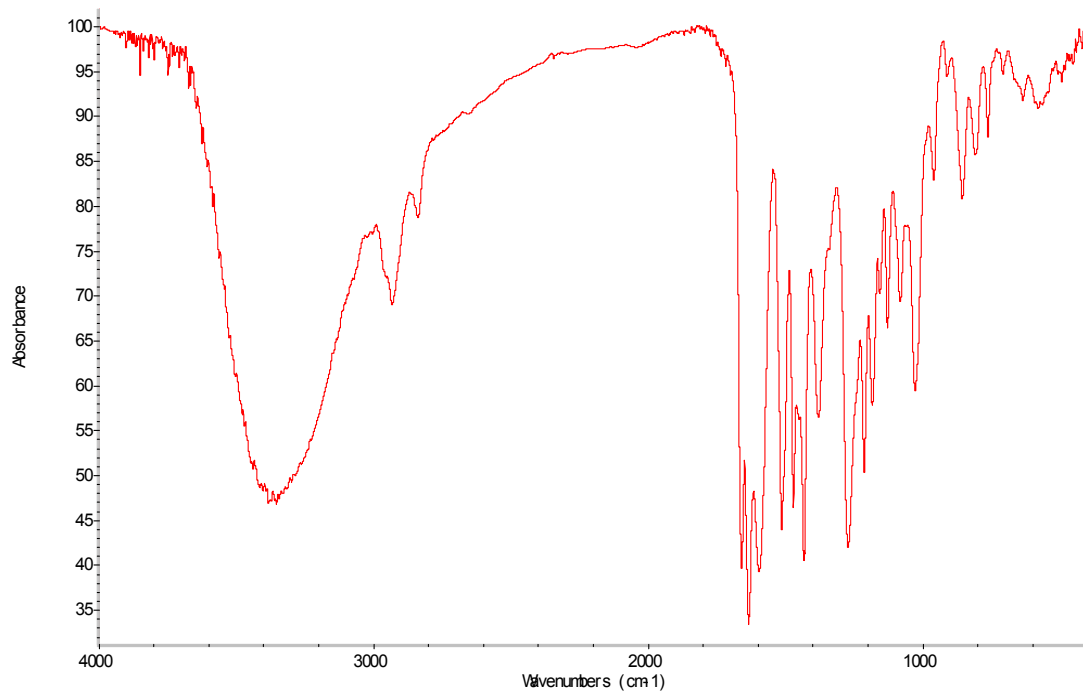

**Figure S8.** IR spectrum of compound 1.

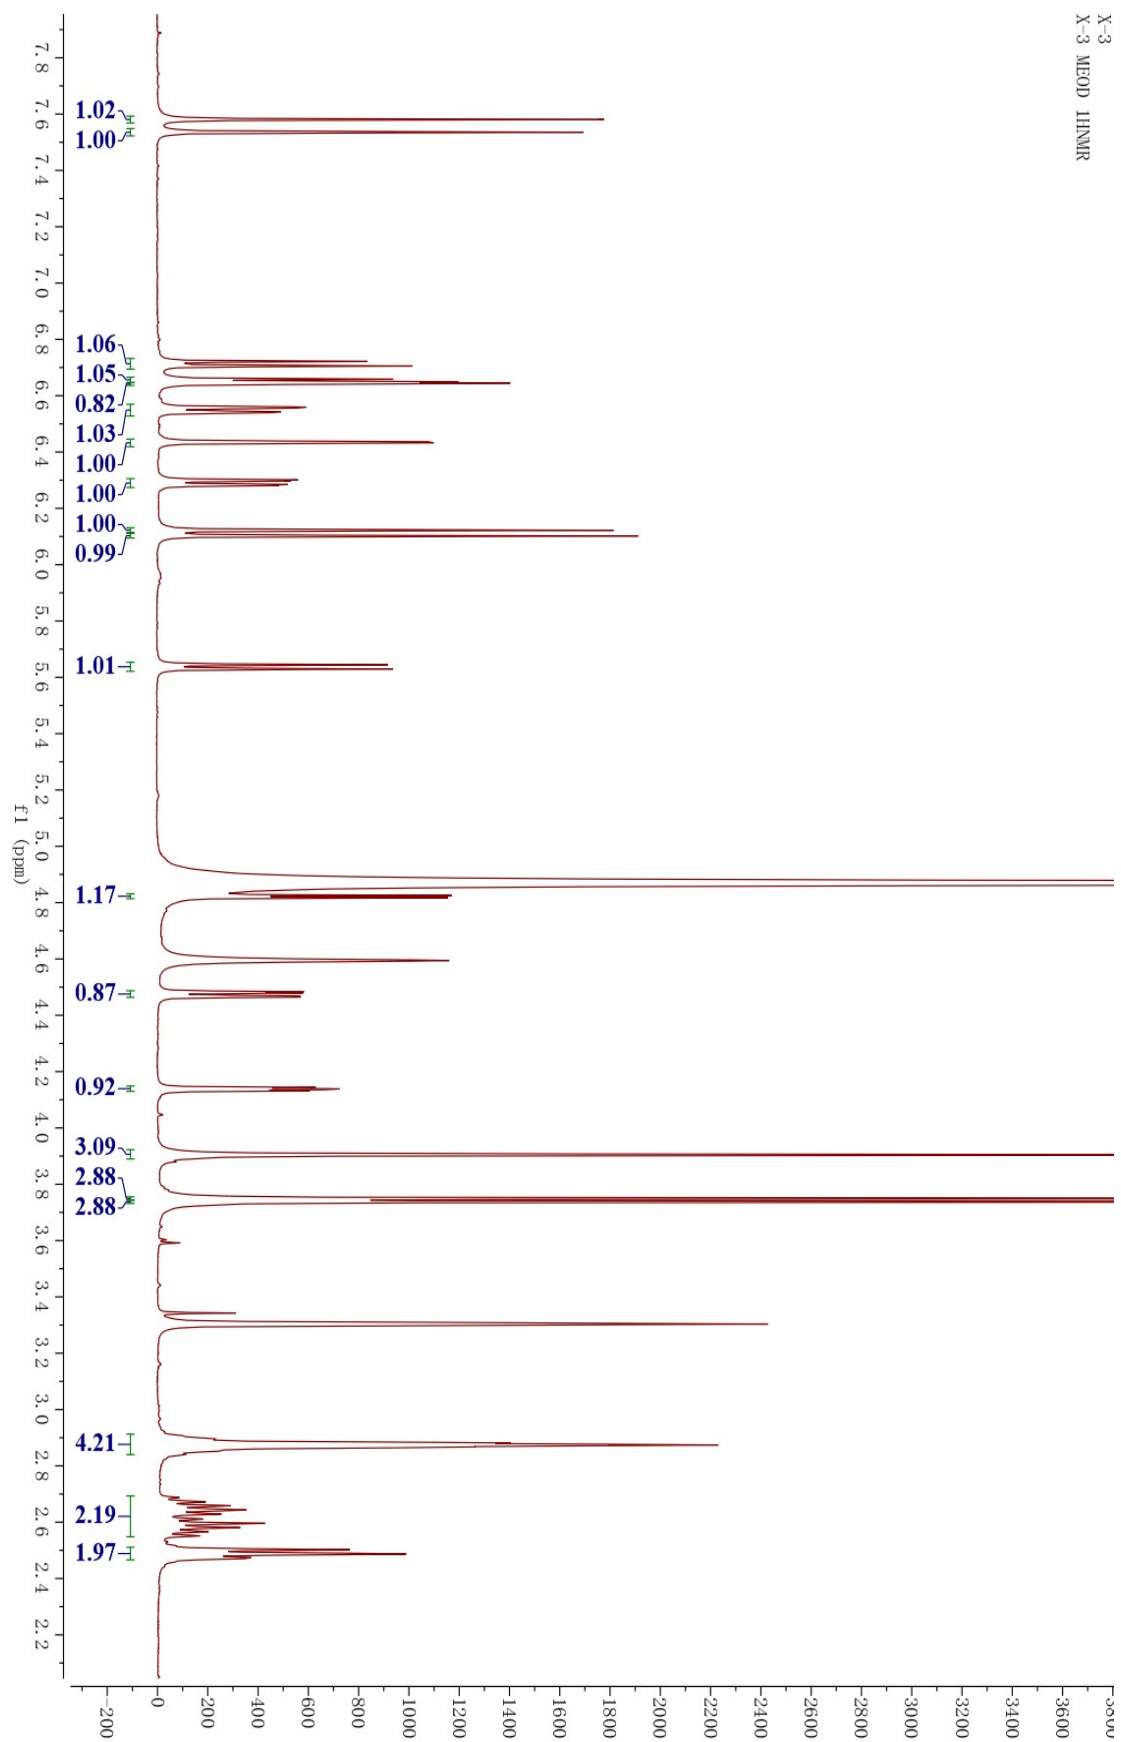

**Figure S9.** <sup>1</sup>H NMR spectrum (500 MHz) of compound **2** in CD<sub>3</sub>OD.

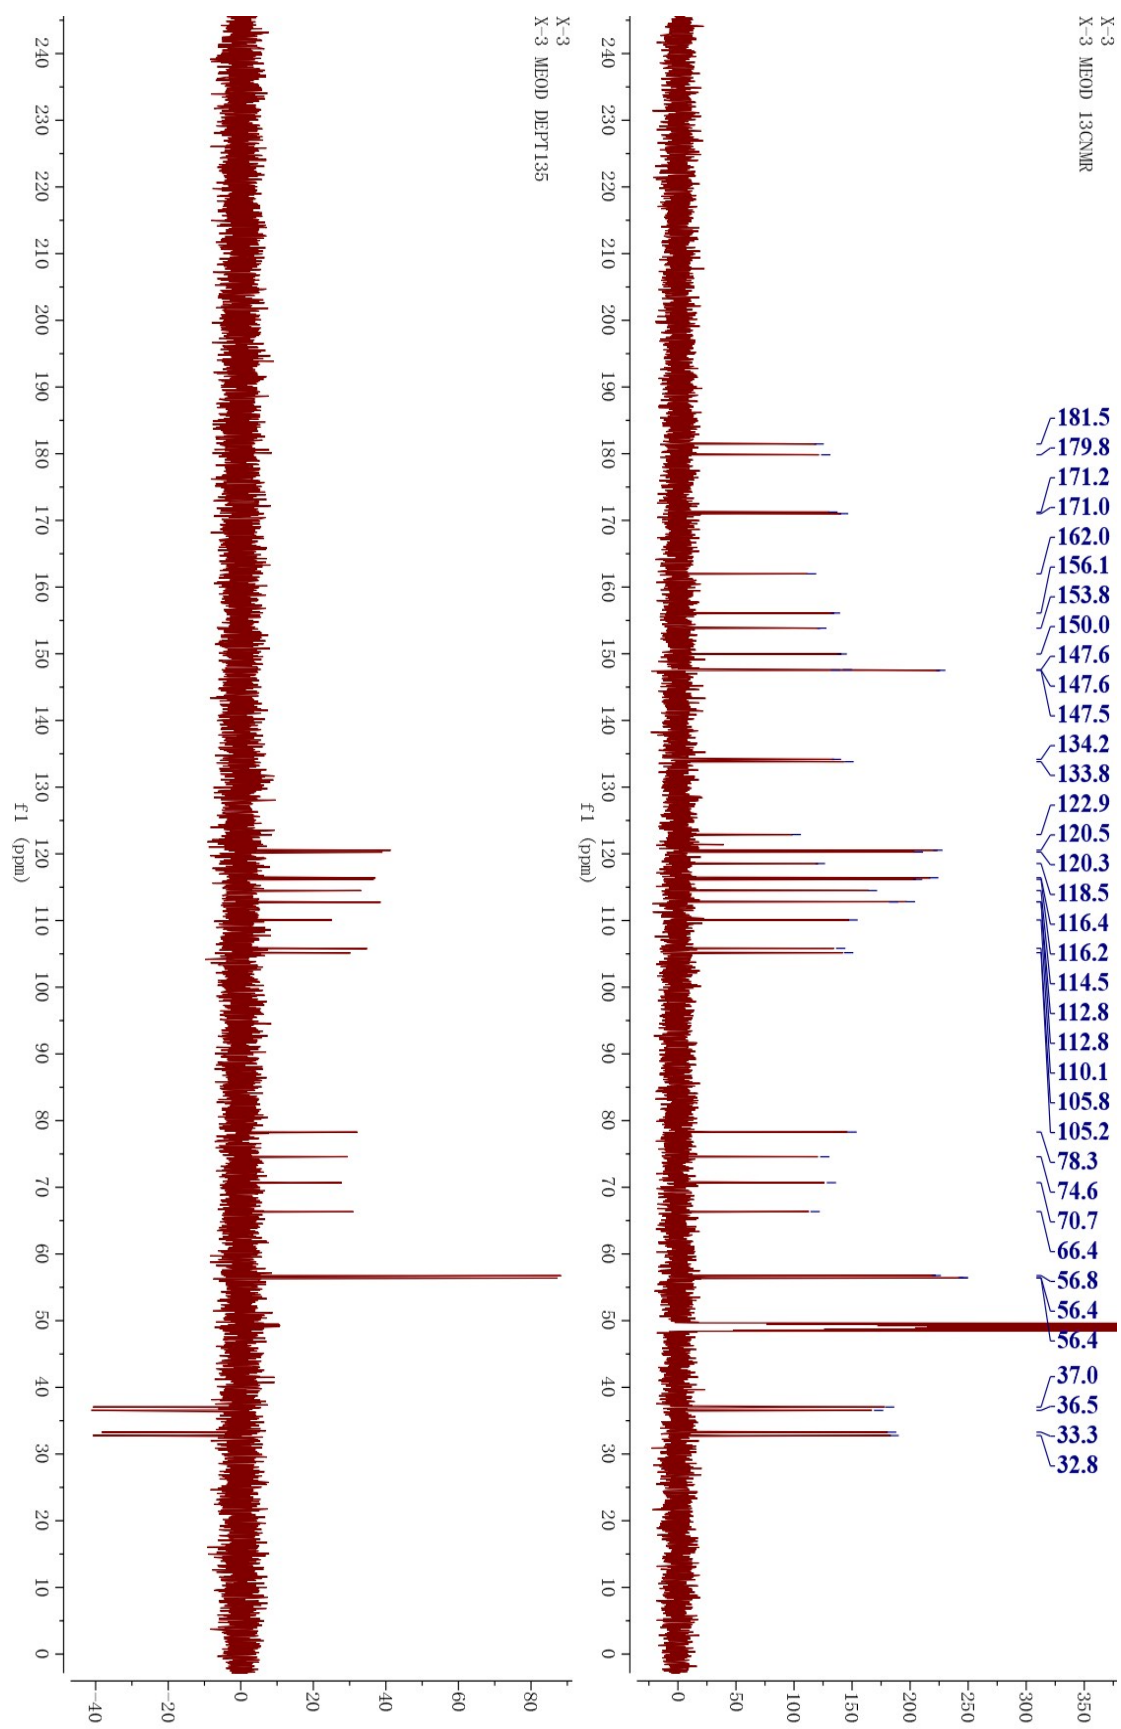

**Figure S10.**  $^{13}\text{C}$  NMR spectrum (125 MHz) of compound **2** in  $\text{CD}_3\text{OD}$ .

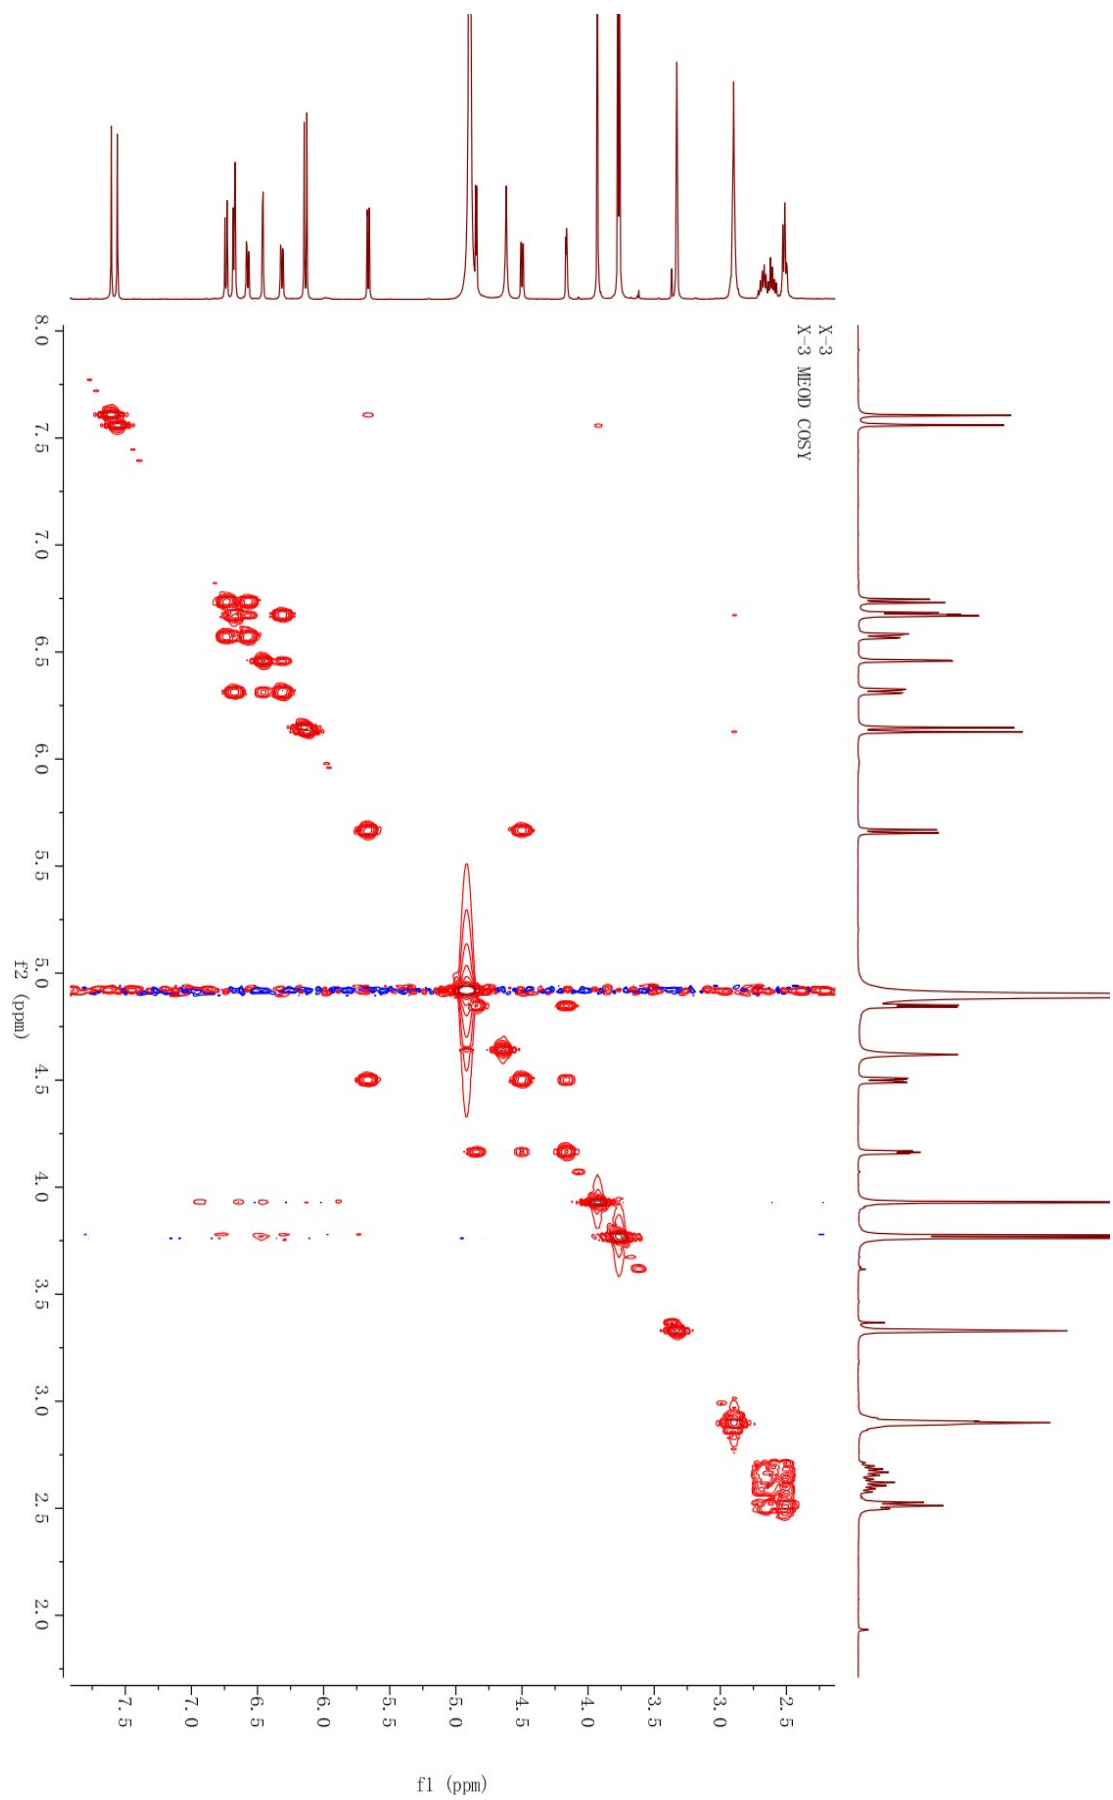

**Figure S11.**  $^1\text{H}$ - $^1\text{H}$  COSY spectrum of compound **2** in  $\text{CD}_3\text{OD}$ .

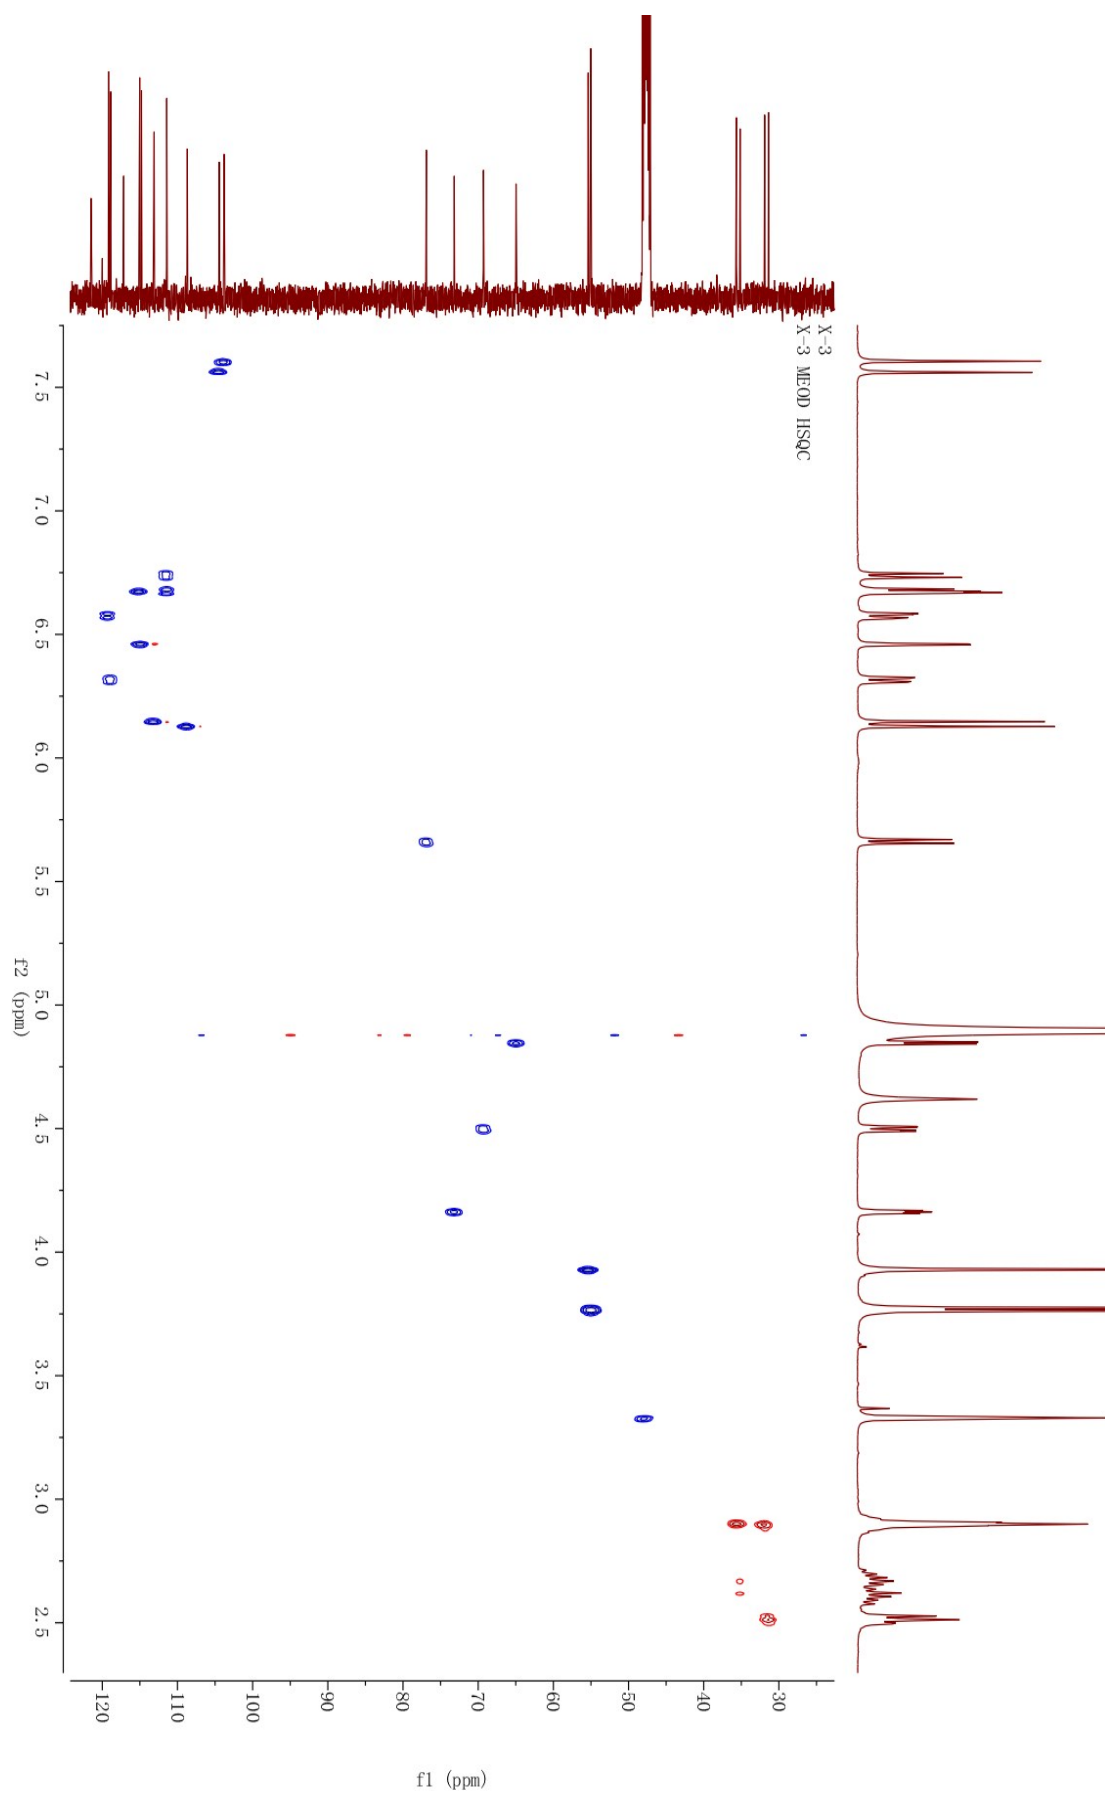

**Figure S12.** HSQC spectrum of compound **2** in CD<sub>3</sub>OD.



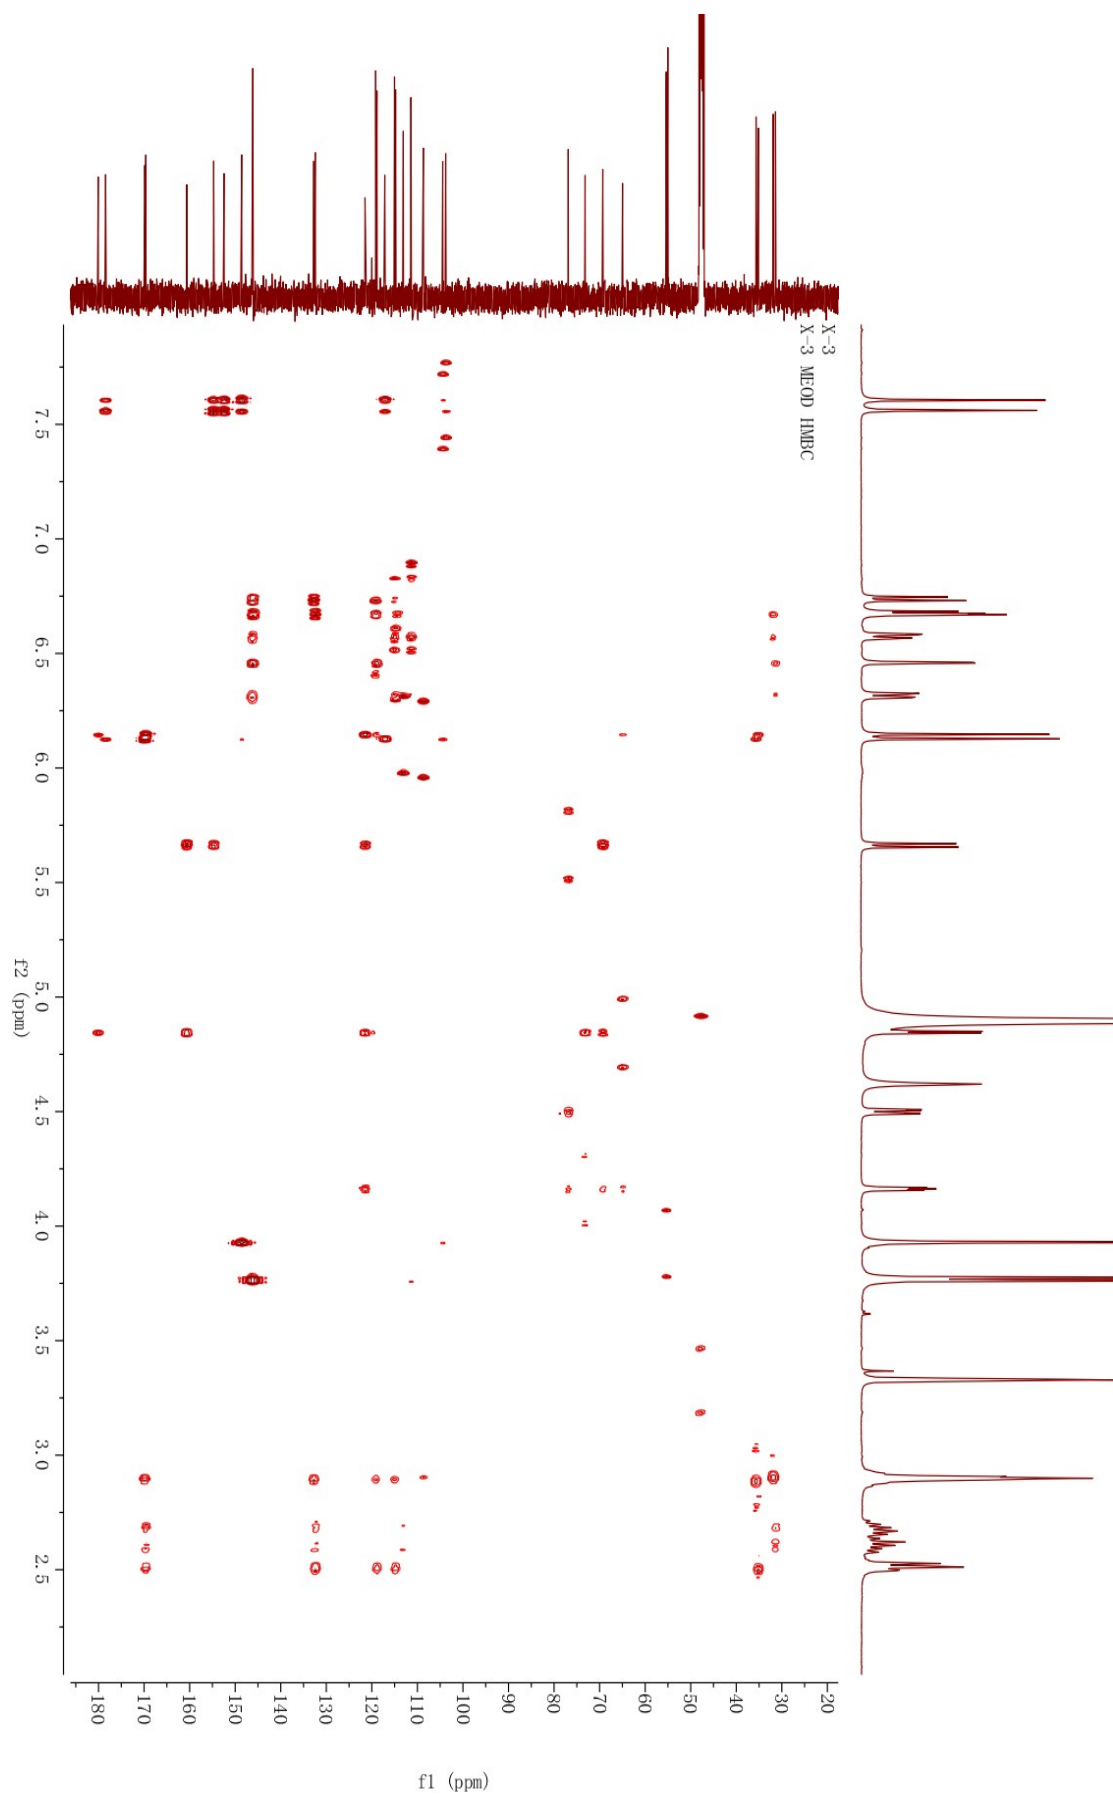

**Figure S13.** HMBC spectrum of compound **2** in CD<sub>3</sub>OD.

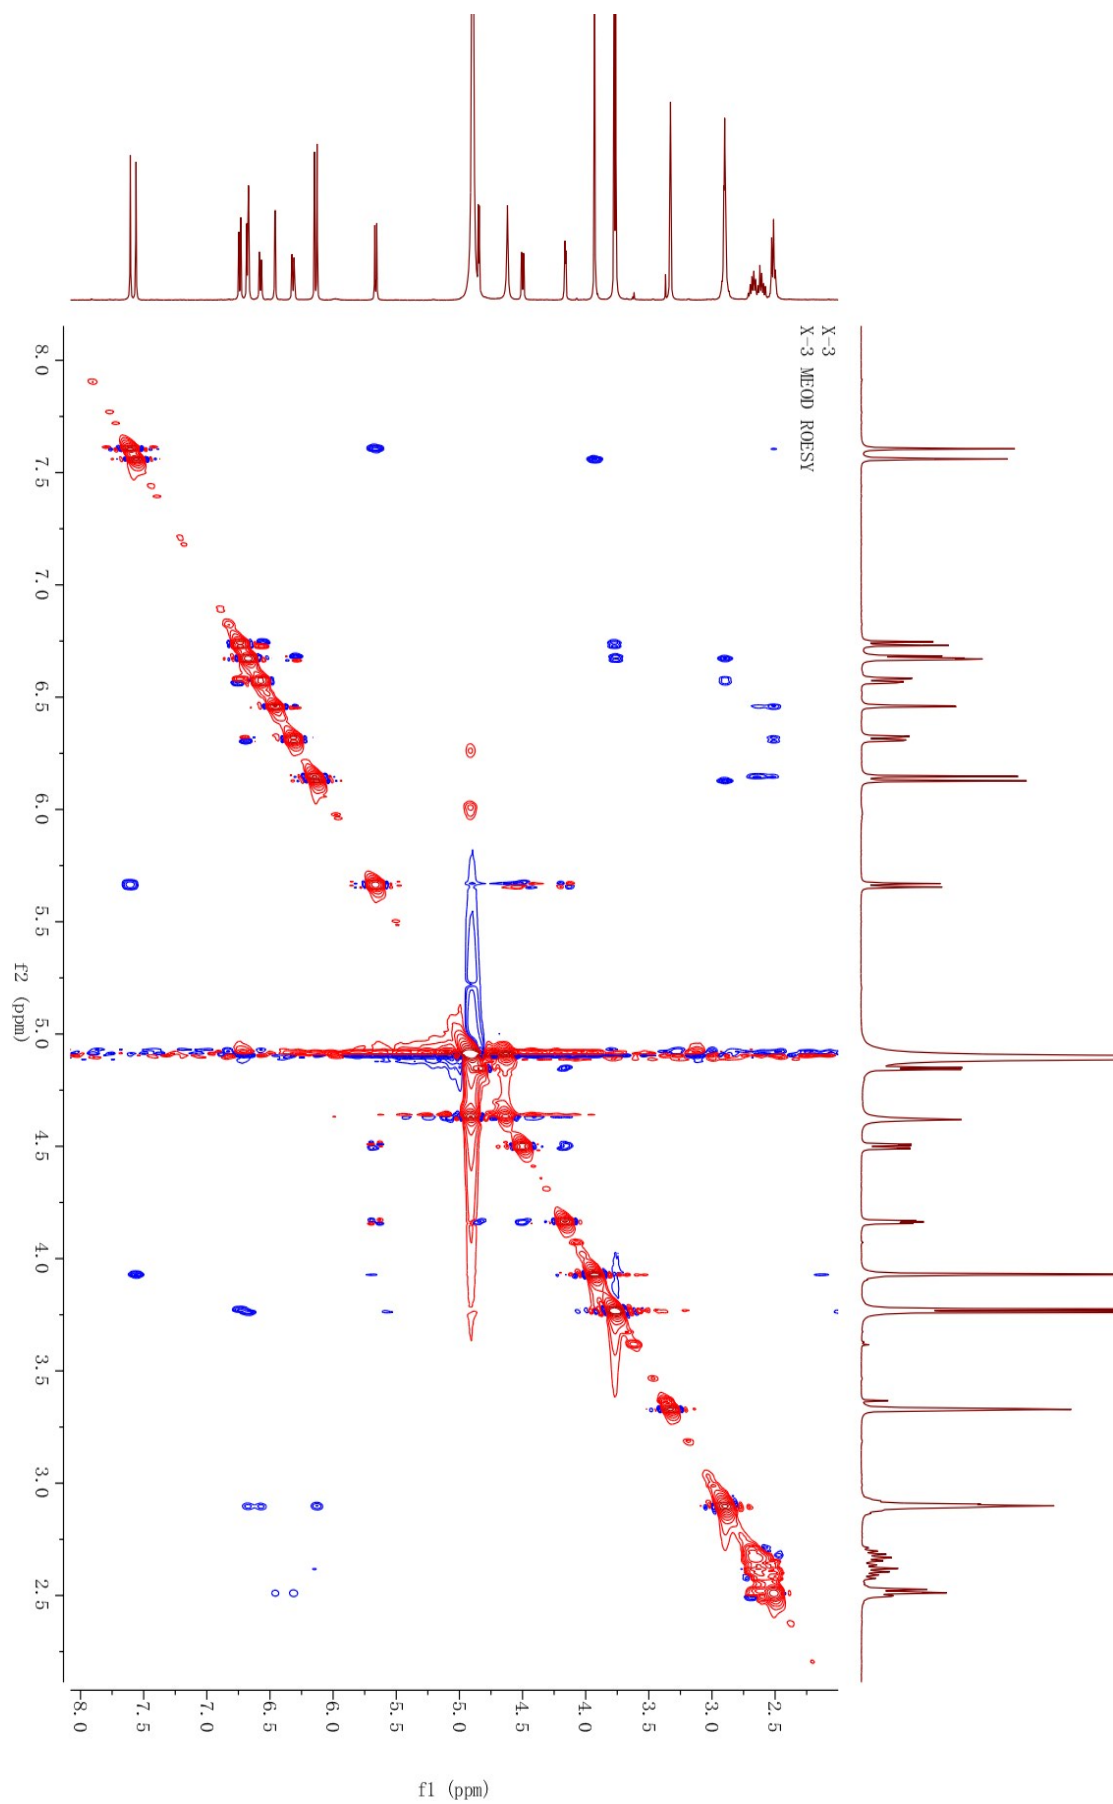

**Figure S14.** ROESY spectrum of compound **2** in CD<sub>3</sub>OD.

## Compound Spectrum SmartFormula Report

**Analysis Info**

Analysis Name D:\Data\A501\Wanghui\X-3.d  
 Method DirectInfusion - MS - positive.m  
 Sample Name kfd-8-25  
 Comment

Acquisition Date 2017-12-15 17:59:24  
 Operator Demo User  
 Instrument compact 8255754.20158

**Acquisition Parameter**

|             |            |                      |          |                  |           |
|-------------|------------|----------------------|----------|------------------|-----------|
| Source Type | ESI        | Ion Polarity         | Positive | Set Nebulizer    | 0.4 Bar   |
| Focus       | Not active | Set Capillary        | 4500 V   | Set Dry Heater   | 180 °C    |
| Scan Begin  | 50 m/z     | Set End Plate Offset | -500 V   | Set Dry Gas      | 4.0 l/min |
| Scan End    | 1300 m/z   | Set Charging Voltage | 2000 V   | Set Divert Valve | Source    |
|             |            | Set Corona           | 0 nA     | Set APCI Heater  | 0 °C      |

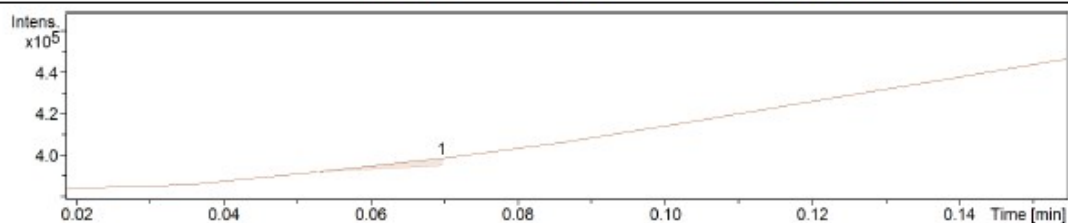

| # | RT [min] | Area   | Int. Type | I      | S/N | Chromatogram | Max. m/z | FWHM [min] |
|---|----------|--------|-----------|--------|-----|--------------|----------|------------|
| 1 | 0.1      | 3404.9 | Manual    | 398690 | 1.3 | BPC +All MS  | 711.2121 | 0.0        |

**Cmpd 1, 0.1 min**
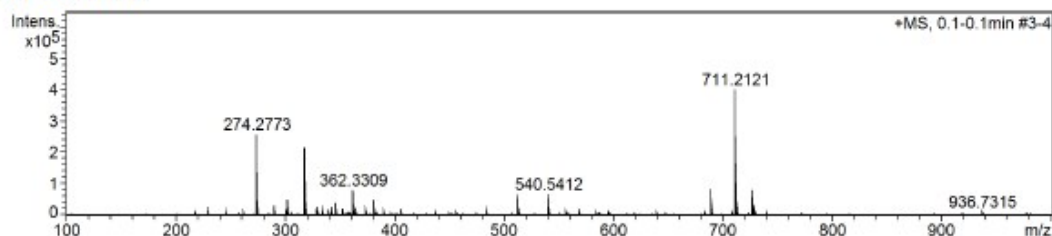

| # | Ion Formula   | m/z      | err [mDa] | err [ppm] | mSigma | rdb  | e <sup>-</sup> Conf | N-Rule |
|---|---------------|----------|-----------|-----------|--------|------|---------------------|--------|
| 1 | C35H70NaO     | 529.5319 | 1.0       | 1.8       | 46.9   | 1.0  | even                | ok     |
| 1 | C37H33N8O8    | 689.2354 | 4.9       | 7.1       | 5.3    | 25.0 | even                | ok     |
| 1 | C36H30N10NaO4 | 689.2344 | 3.8       | 5.5       | 8.6    | 27.0 | even                | ok     |
| 1 | C38H38KN2O8   | 689.2260 | -4.6      | -6.6      | 32.4   | 21.0 | even                | ok     |
| 1 | C37H36NaO13   | 711.2048 | -7.2      | -10.2     | 4.9    | 20.0 | even                | ok     |
| 1 | C38H72N4NaO14 | 831.4937 | -0.0      | -0.0      | 118.9  | 5.0  | even                | ok     |
| 1 | C36H31N4O13   | 727.1882 | 1.2       | 1.6       | 32.5   | 24.0 | even                | ok     |
| 1 | C39H75O18     | 831.4948 | 1.1       | 1.3       | 115.4  | 3.0  | even                | ok     |
| 1 | C39H32N2NaO11 | 727.1898 | 2.8       | 3.8       | 33.7   | 25.0 | even                | ok     |
| 1 | C36H36KN2O12  | 727.1900 | 2.9       | 4.0       | 4.8    | 20.0 | even                | ok     |
| 1 | C36H72KN8O11  | 831.4952 | 1.5       | 1.8       | 81.3   | 5.0  | even                | ok     |
| 2 | C36H37N2O12   | 689.2341 | 3.5       | 5.1       | 7.7    | 20.0 | even                | ok     |
| 2 | C39H34KN8O4   | 689.2273 | -3.2      | -4.7      | 35.7   | 26.0 | even                | ok     |
| 2 | C37H32N8NaO8  | 711.2174 | 5.3       | 7.5       | 5.1    | 25.0 | even                | ok     |
| 2 | C37H32KN8O8   | 727.1913 | 4.3       | 5.9       | 12.4   | 25.0 | even                | ok     |
| 2 | C39H68N8NaO10 | 831.4951 | 1.3       | 1.6       | 119.2  | 10.0 | even                | ok     |
| 2 | C37H27N8O9    | 727.1896 | 2.5       | 3.4       | 35.5   | 29.0 | even                | ok     |
| 2 | C36H24N12NaO5 | 727.1885 | 1.4       | 2.0       | 39.6   | 31.0 | even                | ok     |
| 2 | C36H67N10O12  | 831.4934 | -0.3      | -0.3      | 121.0  | 9.0  | even                | ok     |

X-3.d

Bruker Compass DataAnalysis 4.4

printed: 2018-01-25 16:42:27

by: demo

Page 1 of 2

**Figure S15.** HRESIMS spectrum of compound 2.

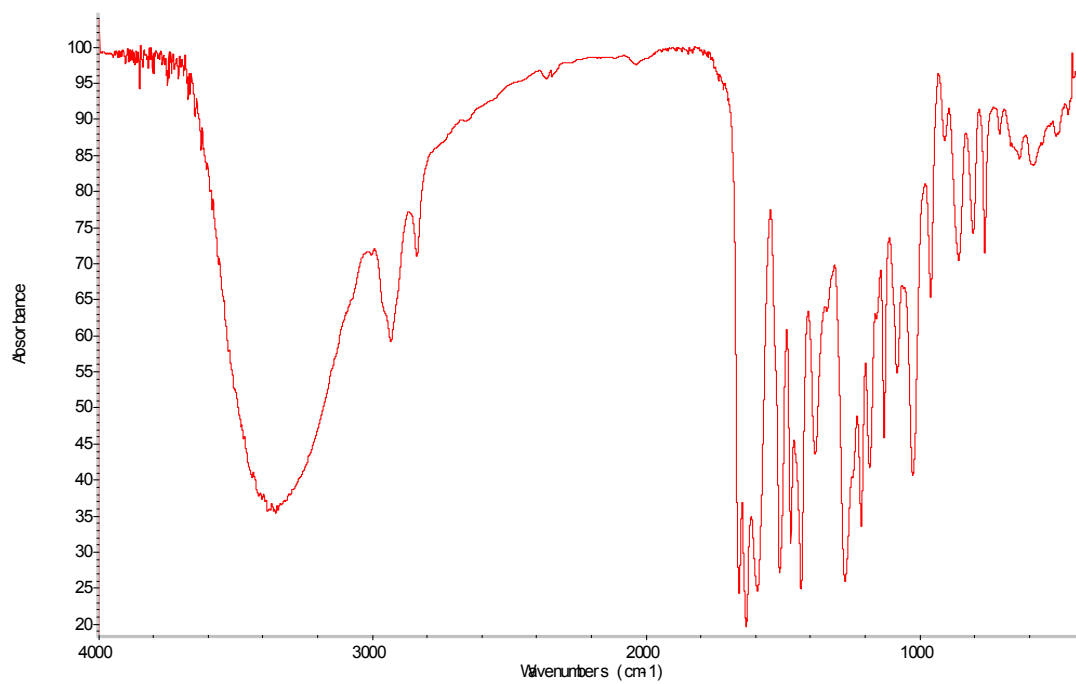

**Figure S16.** IR spectrum of compound 2.

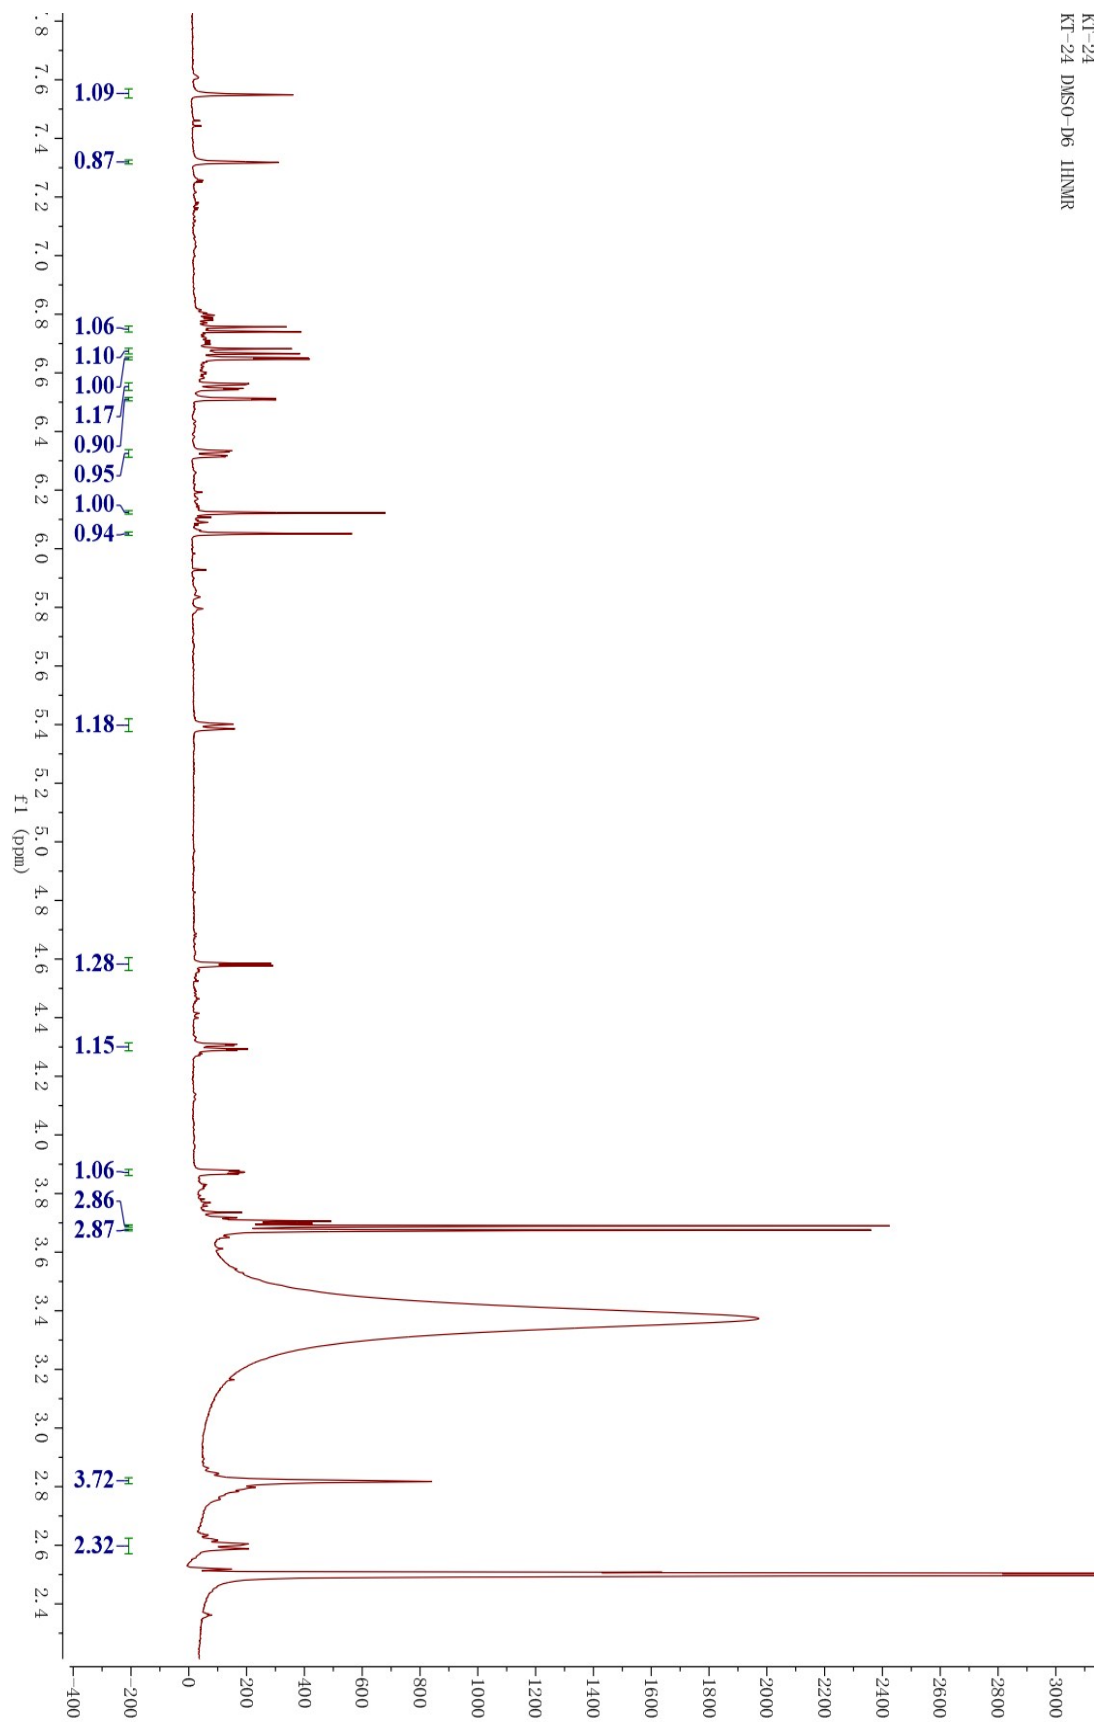

**Figure S17.** <sup>1</sup>H NMR spectrum (500 MHz) of compound **3** in DMSO-*d*<sub>6</sub>.

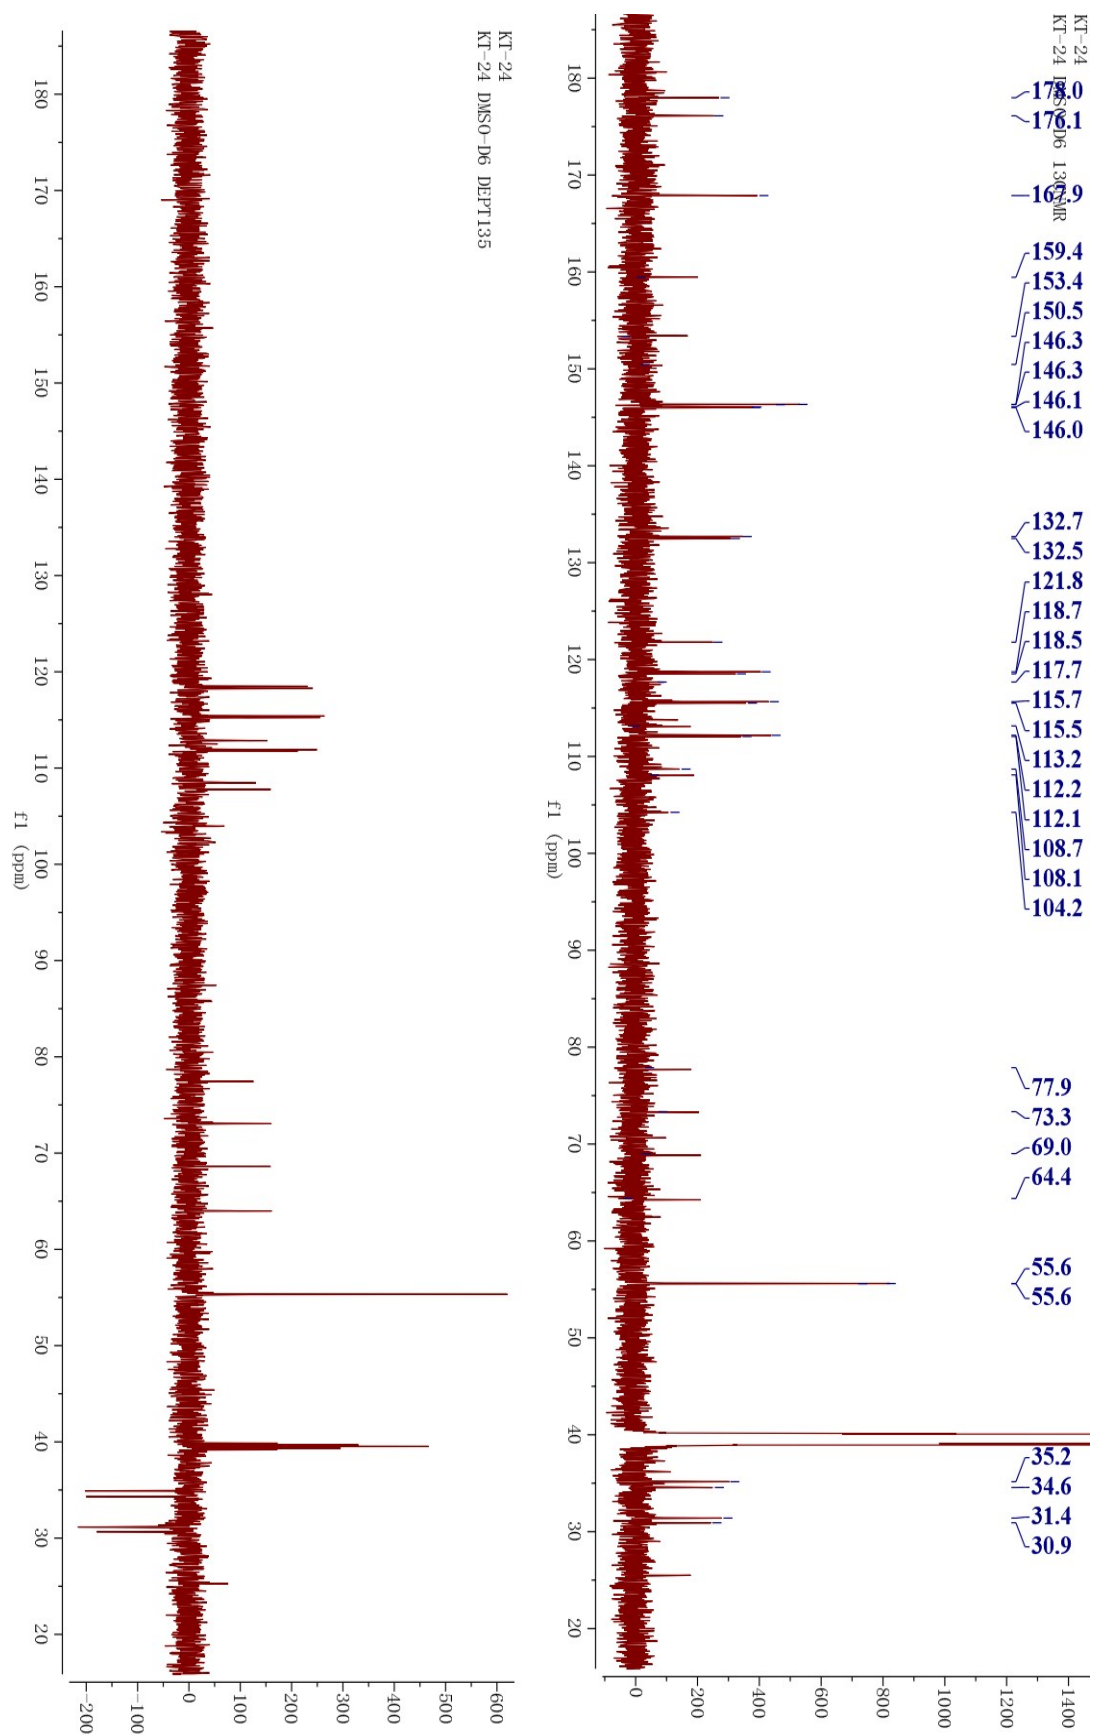

**Figure S18.**  $^{13}\text{C}$  NMR spectrum (125 MHz) of compound **3** in  $\text{DMSO-}d_6$ .

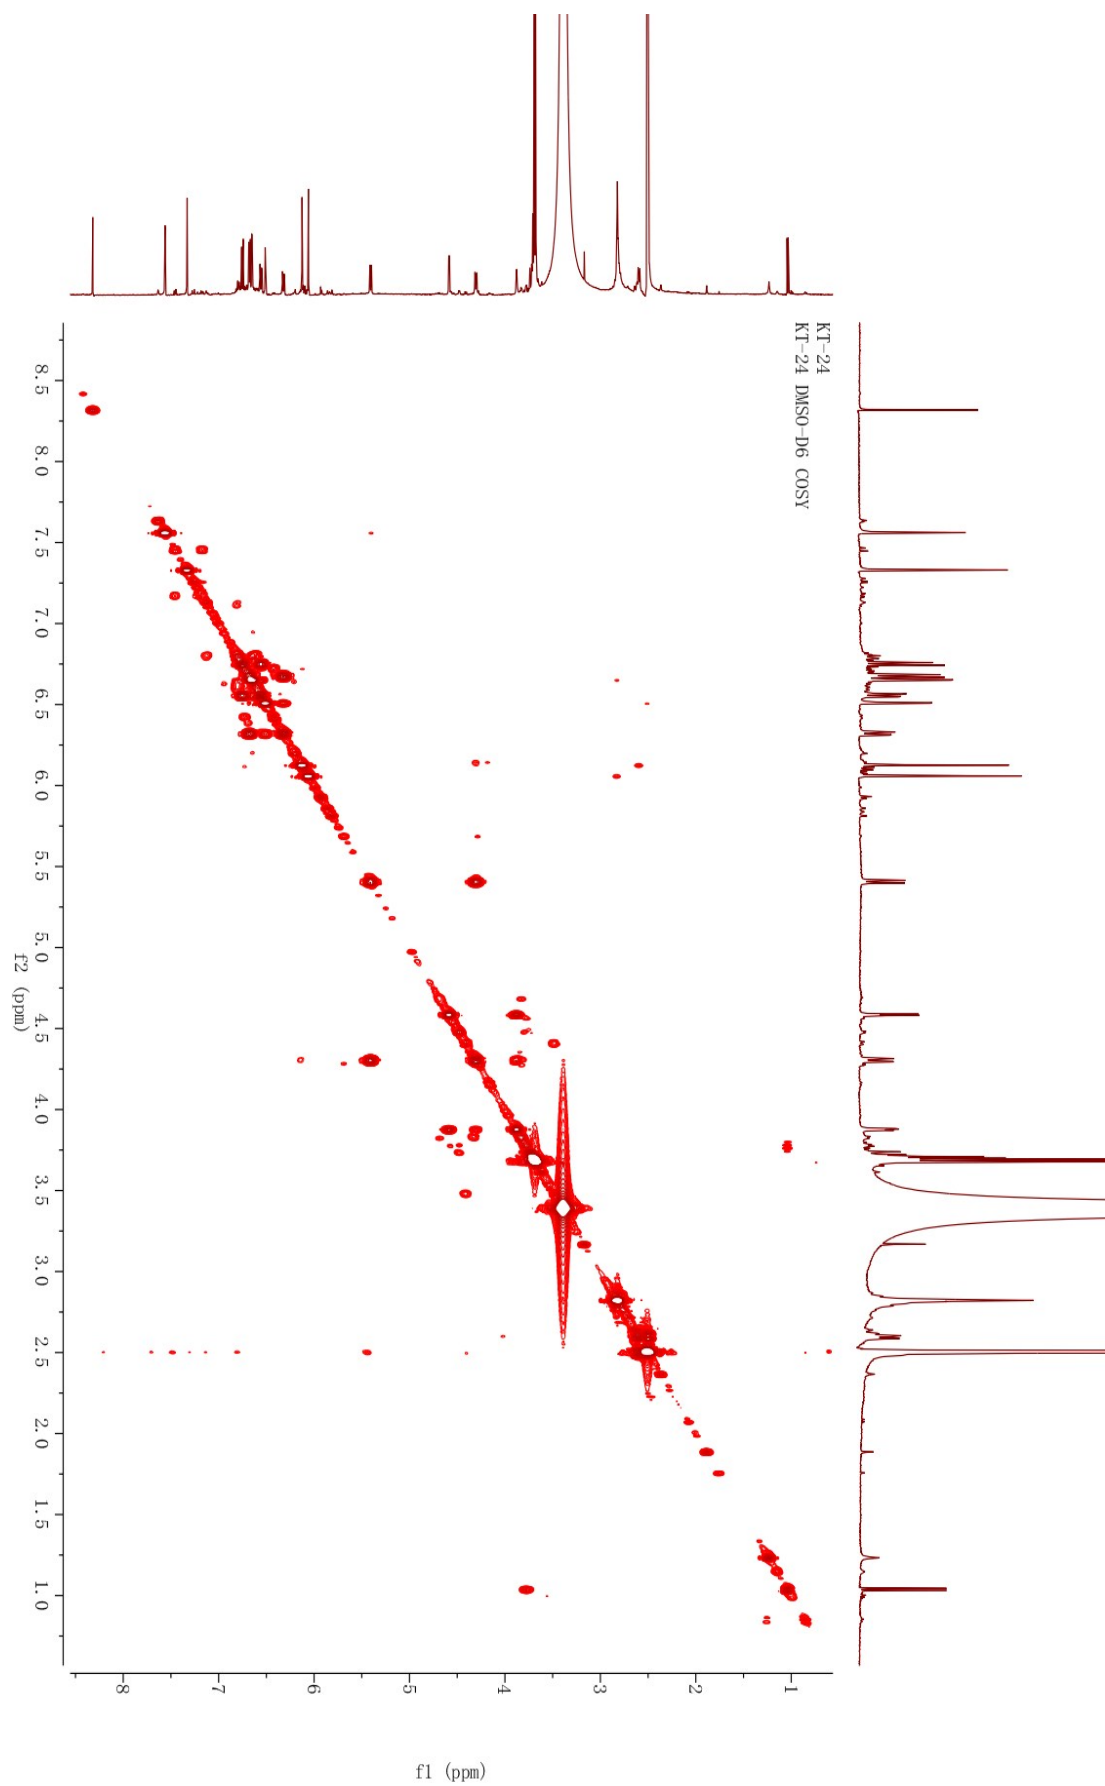

**Figure S19.**  $^1\text{H}$ - $^1\text{H}$  COSY spectrum of compound **3** in  $\text{DMSO-}d_6$ .

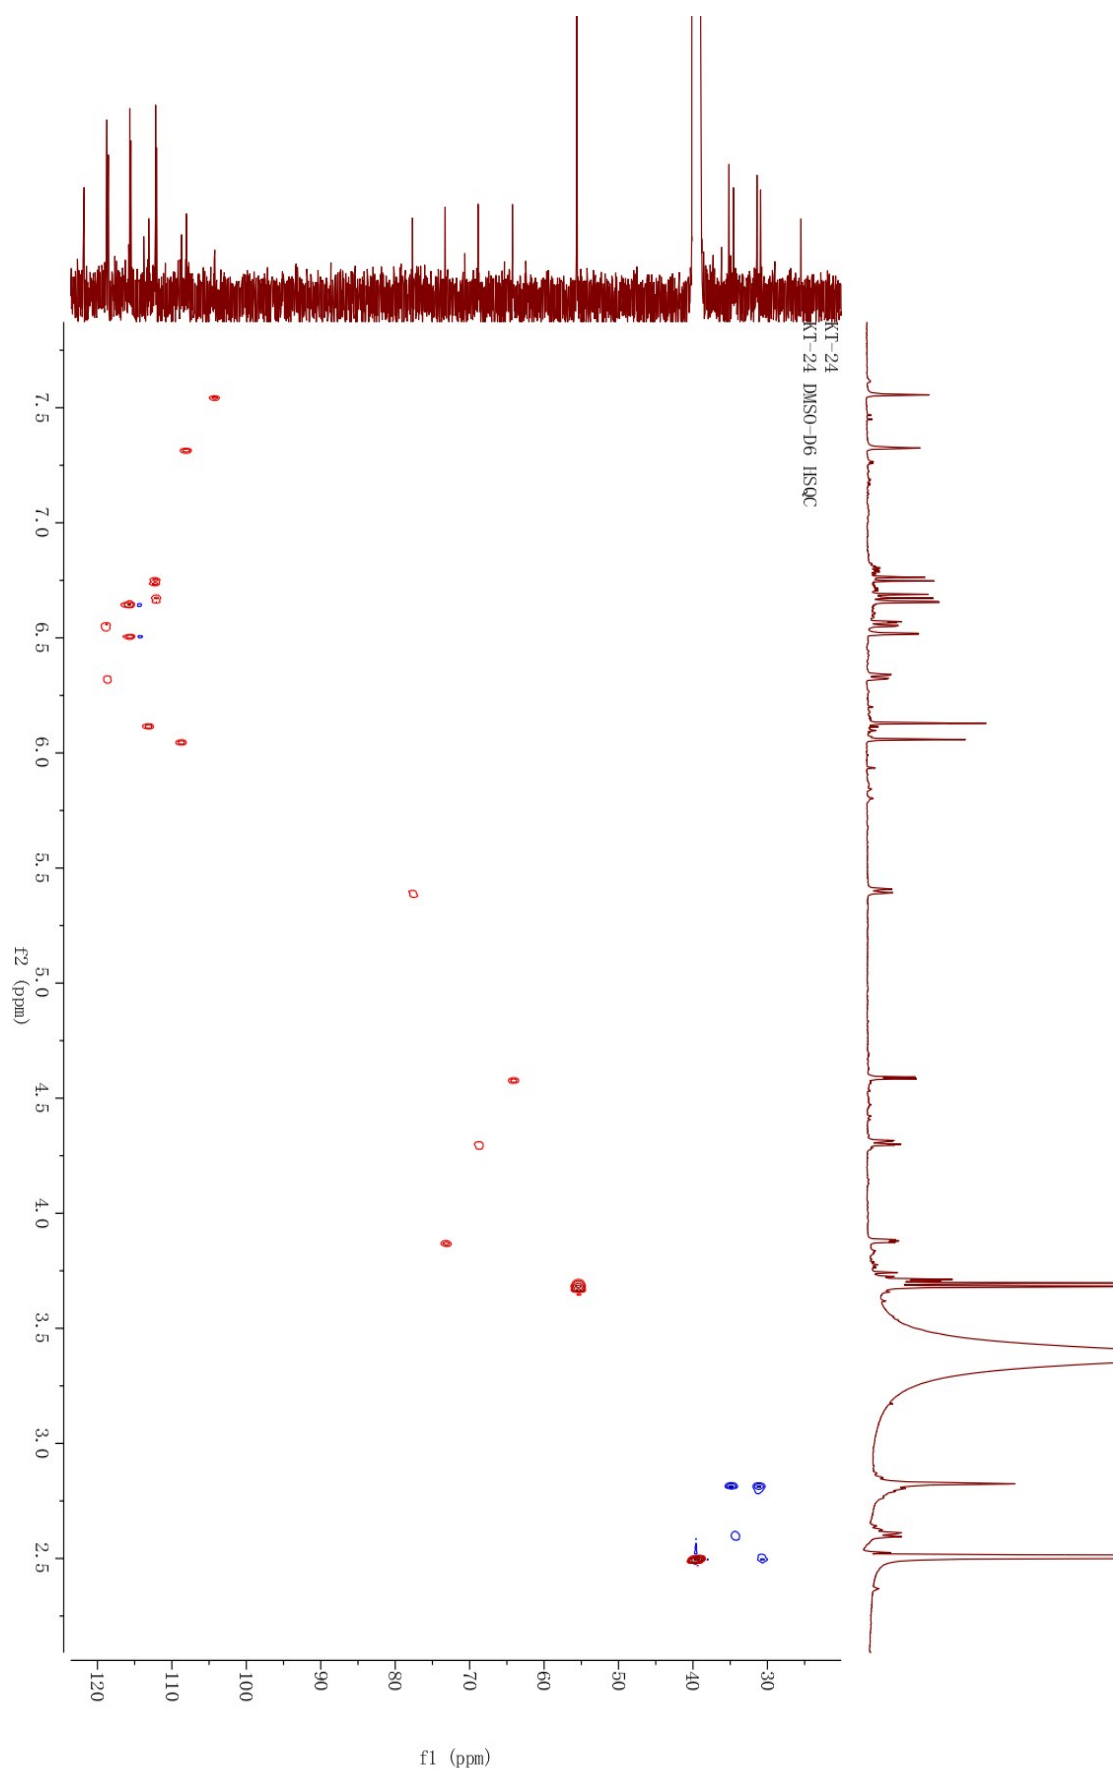

**Figure S20.** HSQC spectrum of compound **3** in DMSO- $d_6$ .



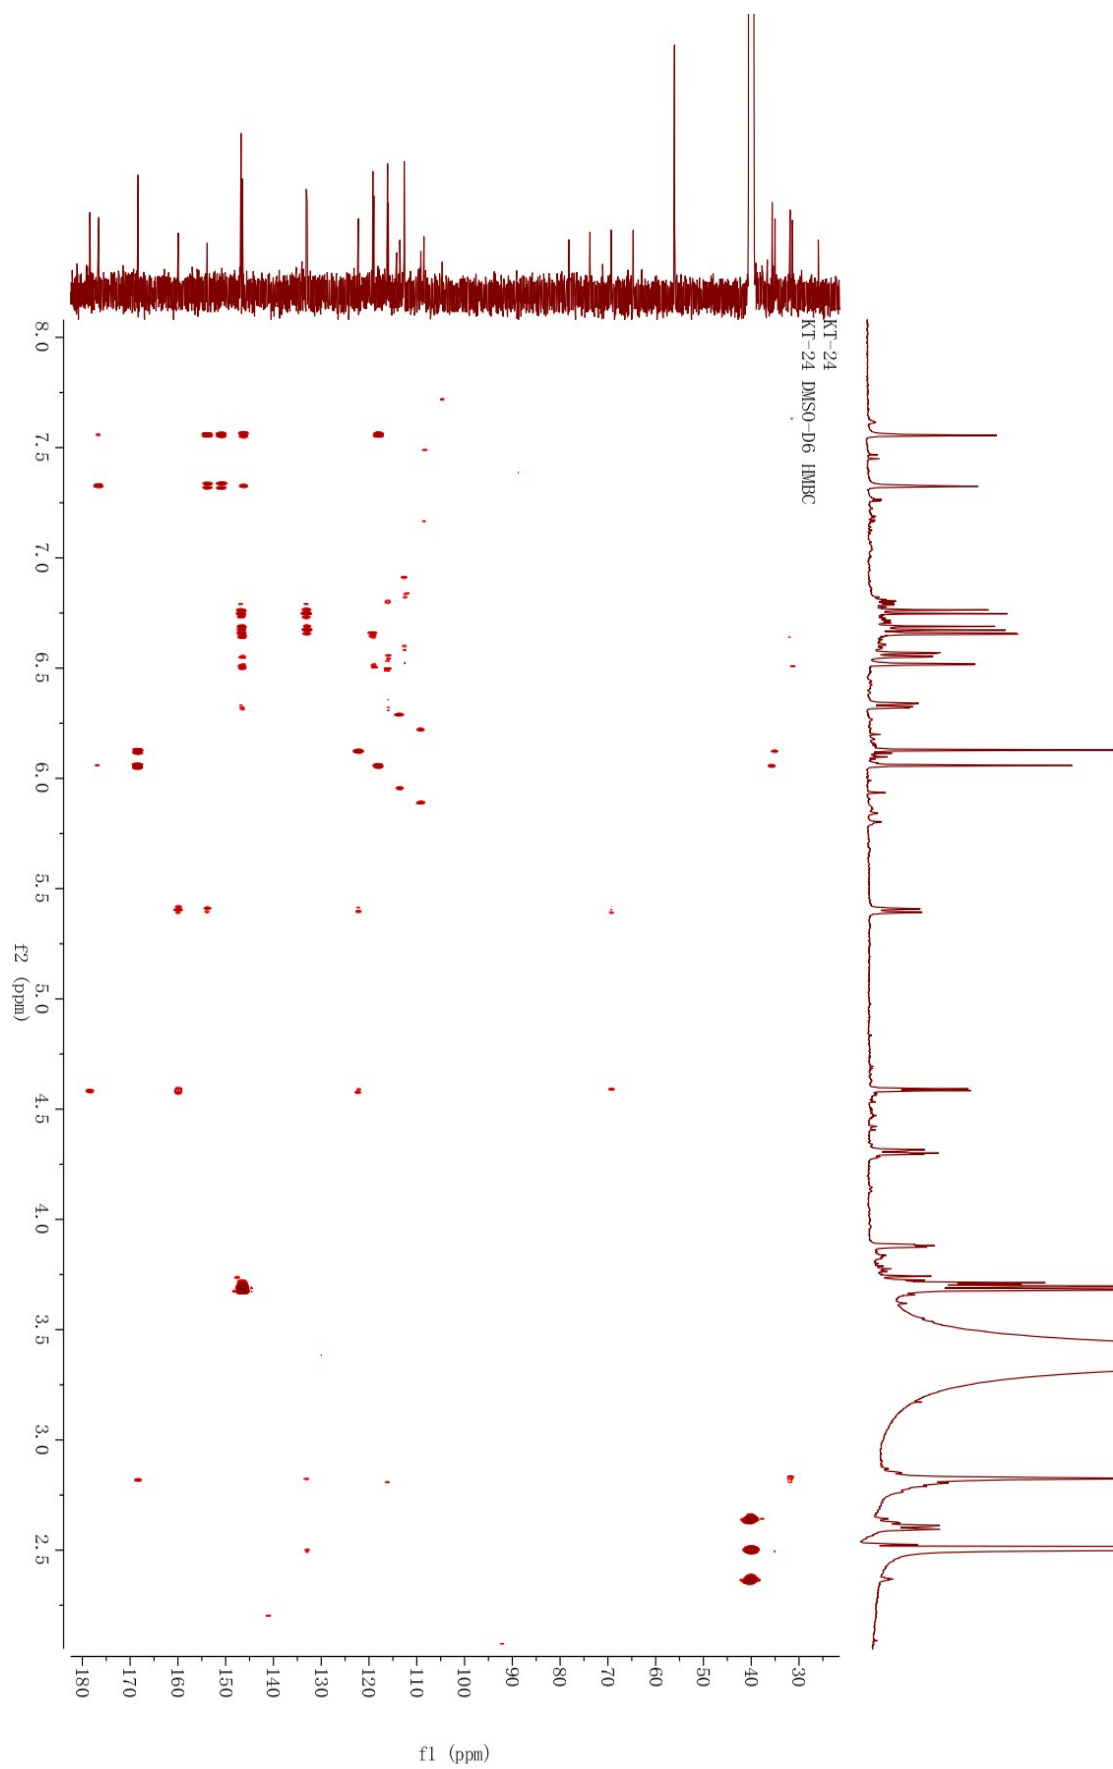

**Figure S21.** HMBC spectrum of compound **3** in DMSO-*d*<sub>6</sub>.

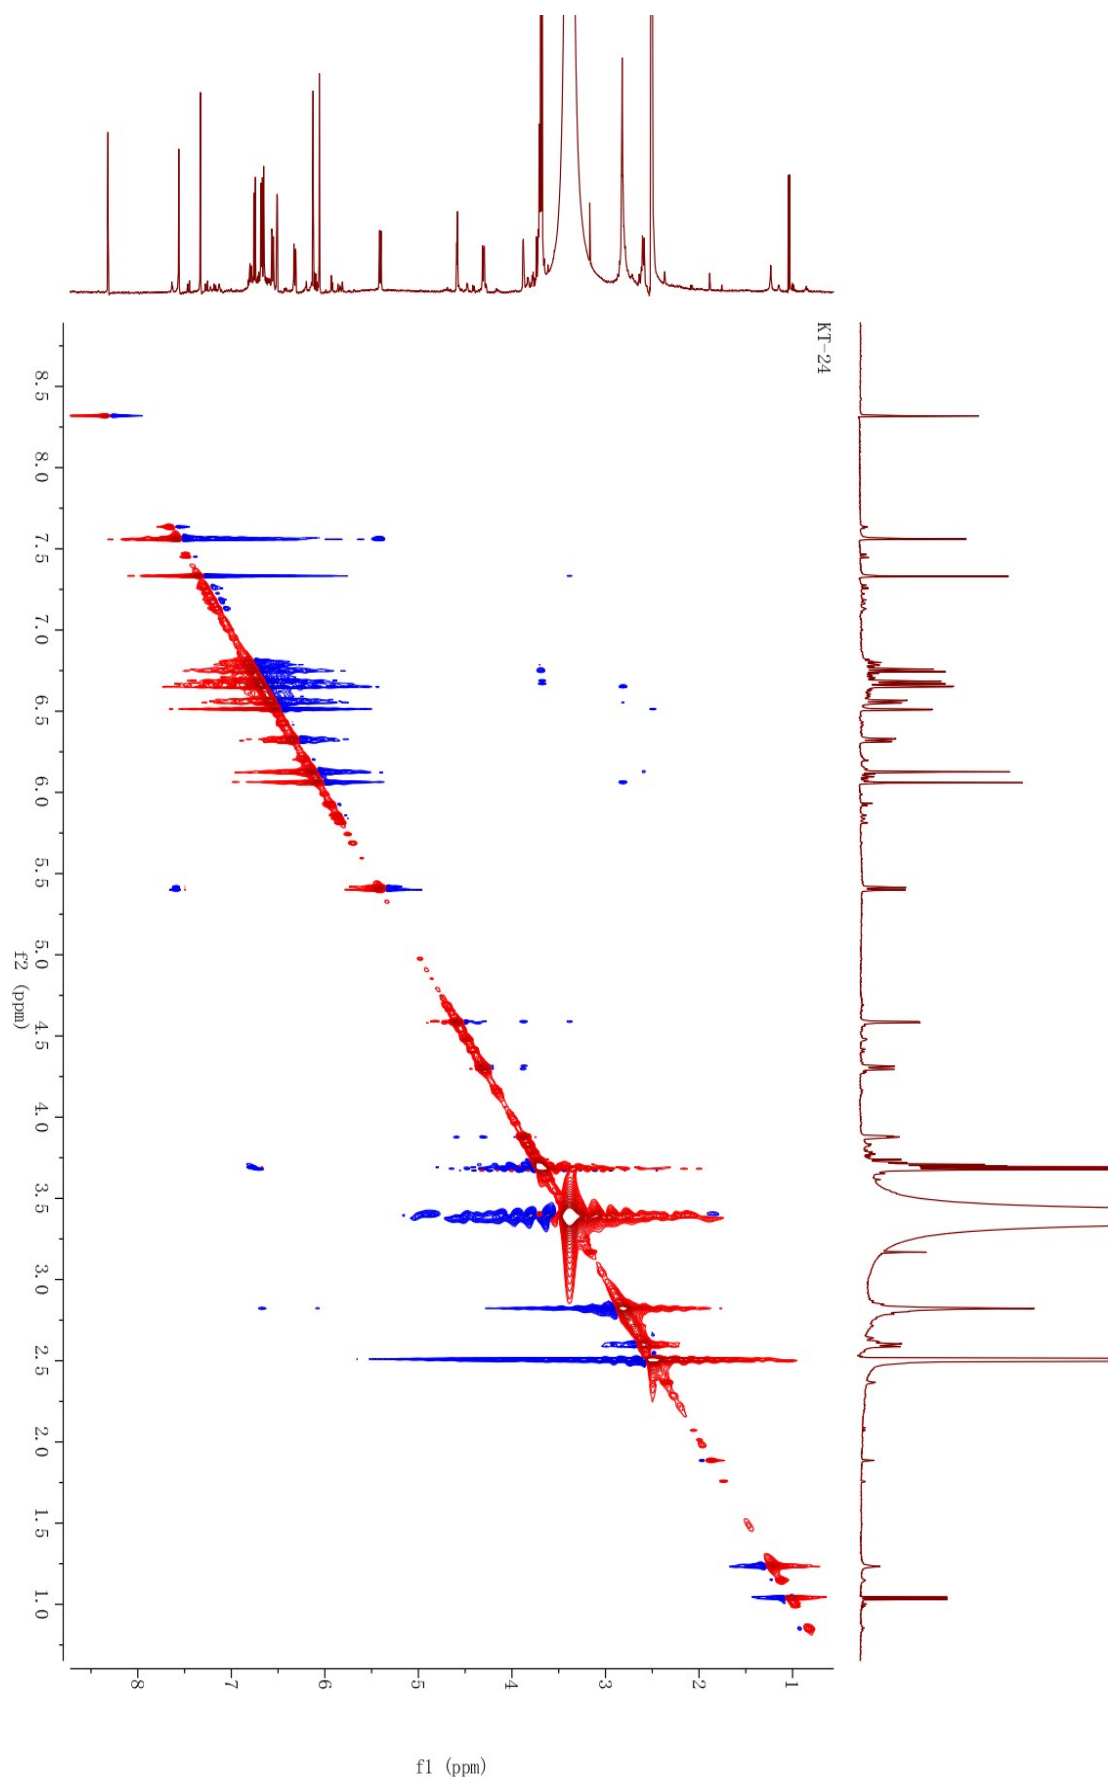

**Figure S22.** ROESY spectrum of compound **3** in DMSO-*d*<sub>6</sub>.

## Qualitative Analysis Report

|                        |                             |               |                     |
|------------------------|-----------------------------|---------------|---------------------|
| Data Filename          | HK-DHF-79.d                 | Sample Name   | HK-DHF-79           |
| Sample Type            | Sample                      | Position      | P1-D7               |
| Instrument Name        | Instrument 1                | User Name     |                     |
| Acq Method             | SIBU.m                      | Acquired Time | 2/1/2018 2:43:18 PM |
| IRM Calibration Status | Success                     | DA Method     | Default.m           |
| Comment                |                             |               |                     |
| Sample Group           |                             | Info.         |                     |
| Acquisition SW         | 6200 series TOF/6500 series |               |                     |
| Version                | Q-TOF B.05.01 (B5125.2)     |               |                     |

### User Spectra

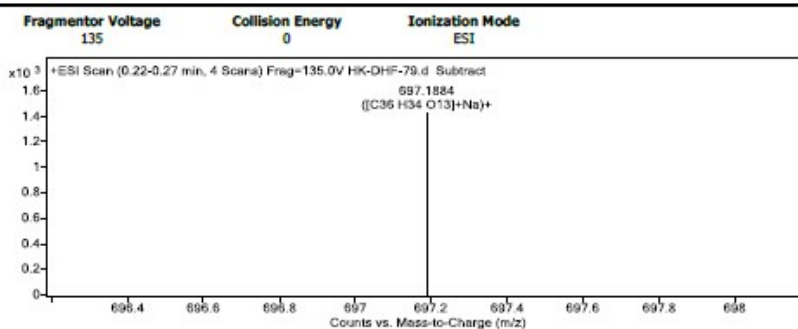

#### Peak List

| m/z      | z | Abund    |
|----------|---|----------|
| 95.0113  | 1 | 4960.45  |
| 96.0432  | 2 | 5143.66  |
| 104.0324 | 2 | 14708.21 |
| 107.0405 | 1 | 65952.41 |
| 138.0683 | 2 | 6437.37  |
| 146.0583 | 2 | 11968.7  |
| 274.274  | 1 | 6651.35  |
| 318.2998 | 1 | 4804.76  |

#### Formula Calculator Element Limits

| Element | Min | Max |
|---------|-----|-----|
| C       | 3   | 60  |
| H       | 0   | 120 |
| O       | 0   | 30  |

#### Formula Calculator Results

| Formula     | CalculatedMass | CalculatedMz | Mz       | Diff. (mDa) | Diff. (ppm) | DBE     |
|-------------|----------------|--------------|----------|-------------|-------------|---------|
| C36 H34 O13 | 674.1999       | 697.1892     | 697.1884 | 0.80        | 1.15        | 20.0000 |

--- End Of Report ---

**Figure S23.** HRESIMS spectrum of compound 3.

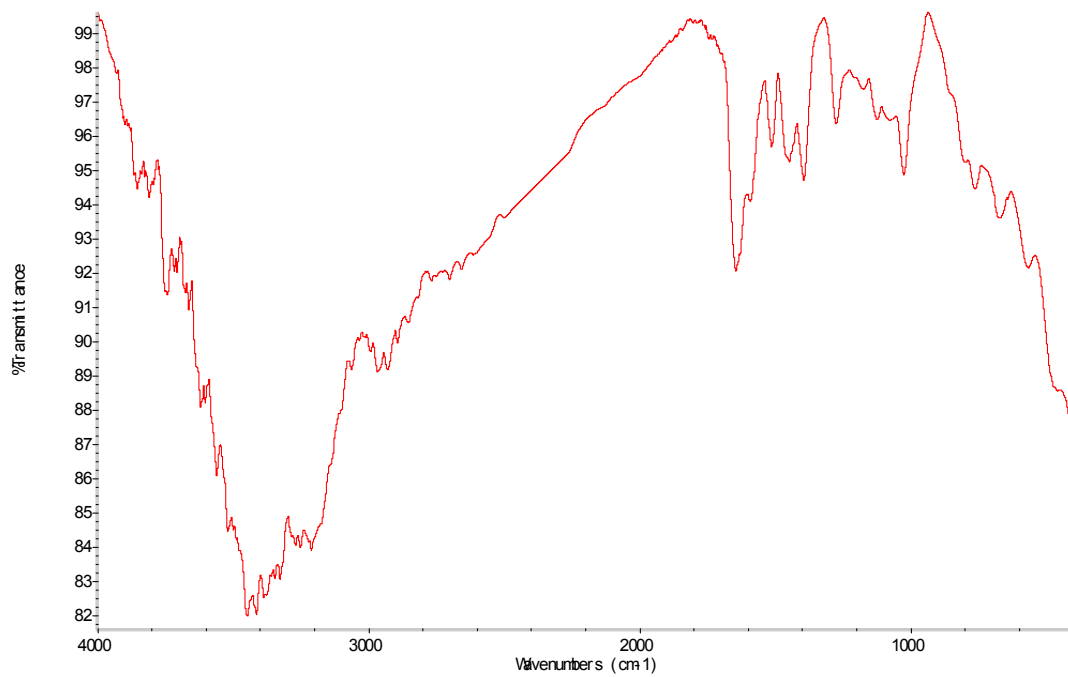

**Figure S24.** IR spectrum of compound **3**.

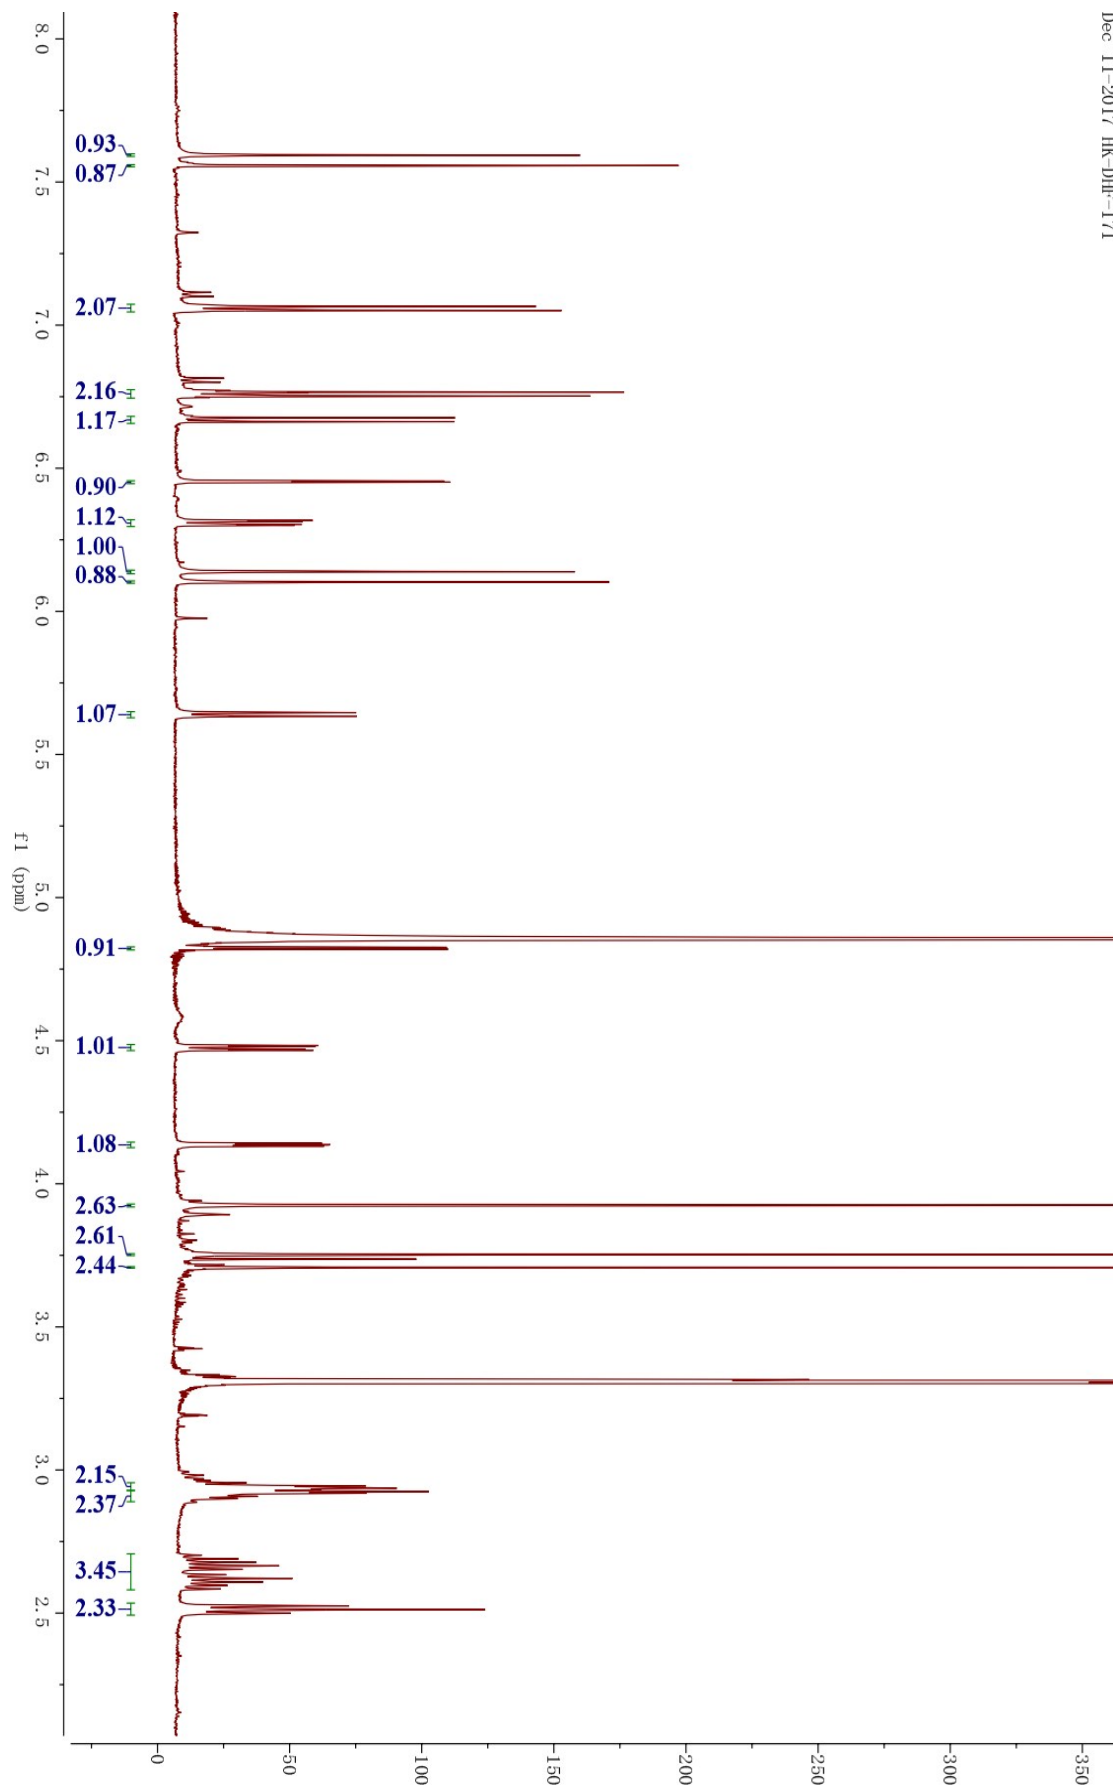

**Figure S25.**  $^1\text{H}$  NMR spectrum (600 MHz) of compound **4** in  $\text{CD}_3\text{OD}$ .

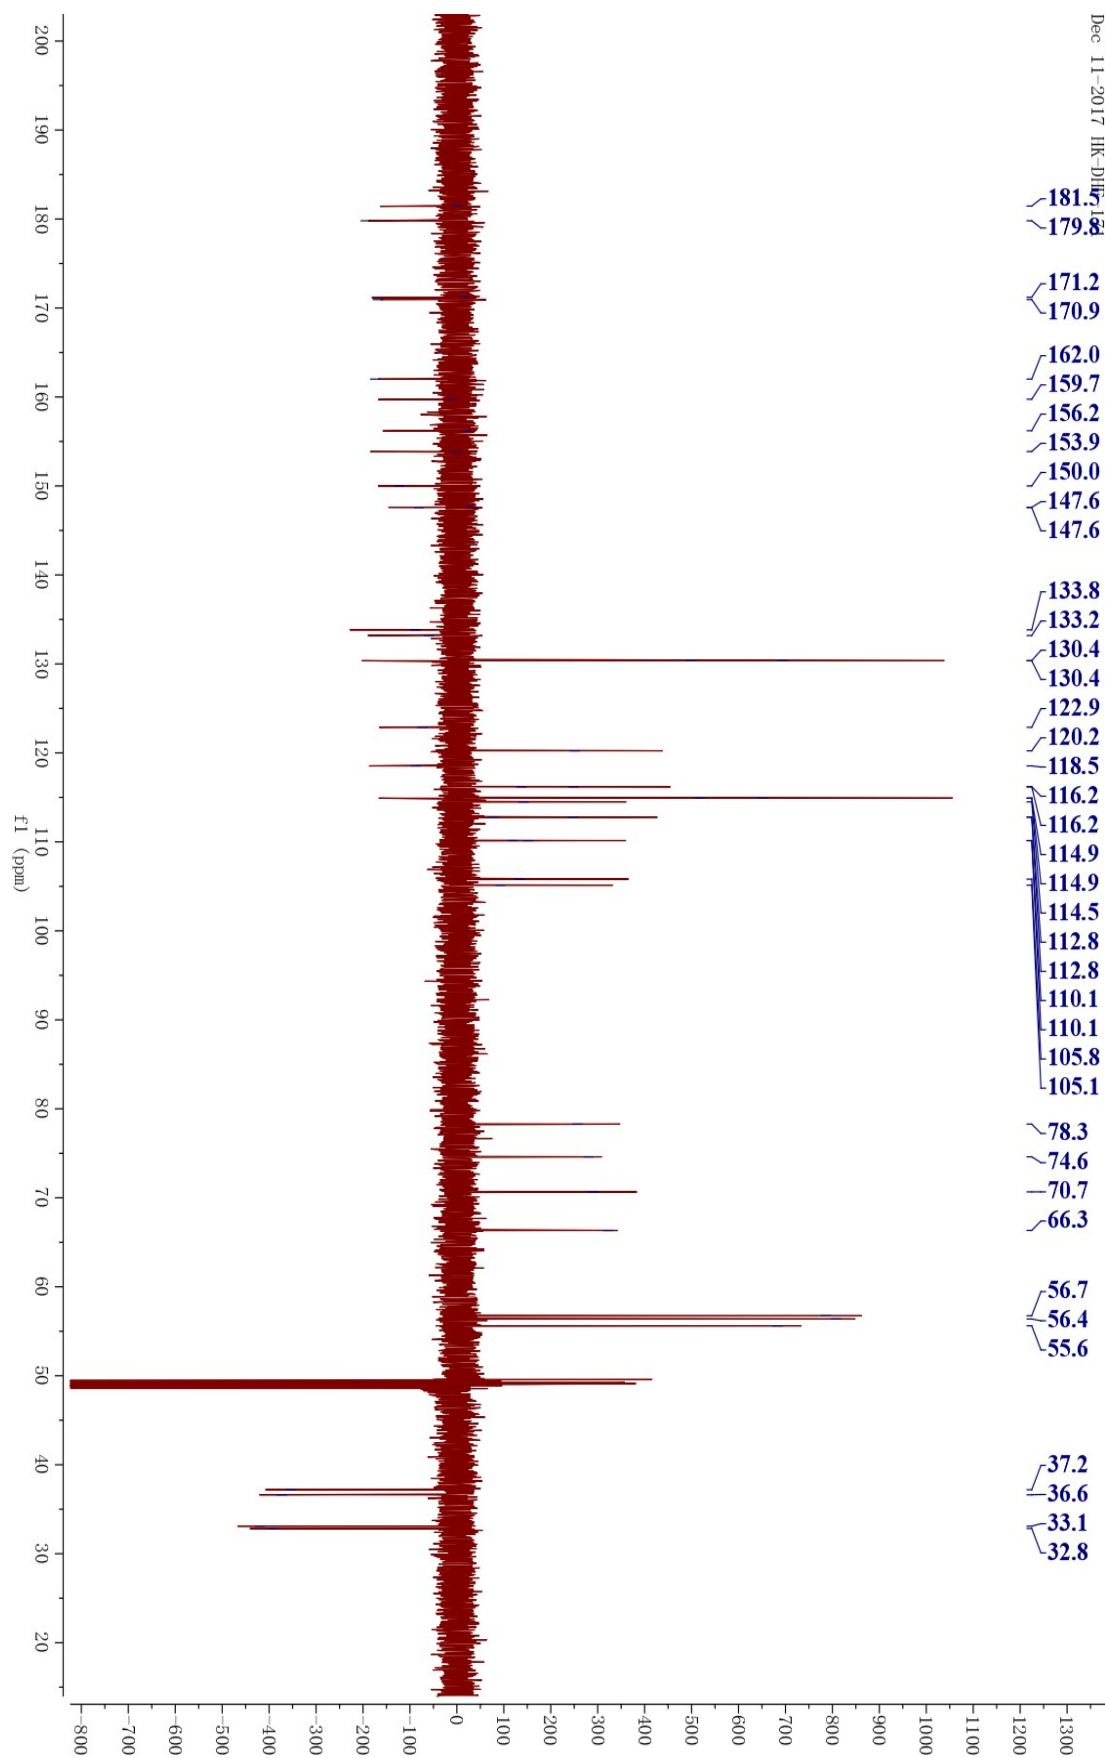

**Figure S26.** DEPTQ spectrum (150 MHz) of compound **4** in CD<sub>3</sub>OD.

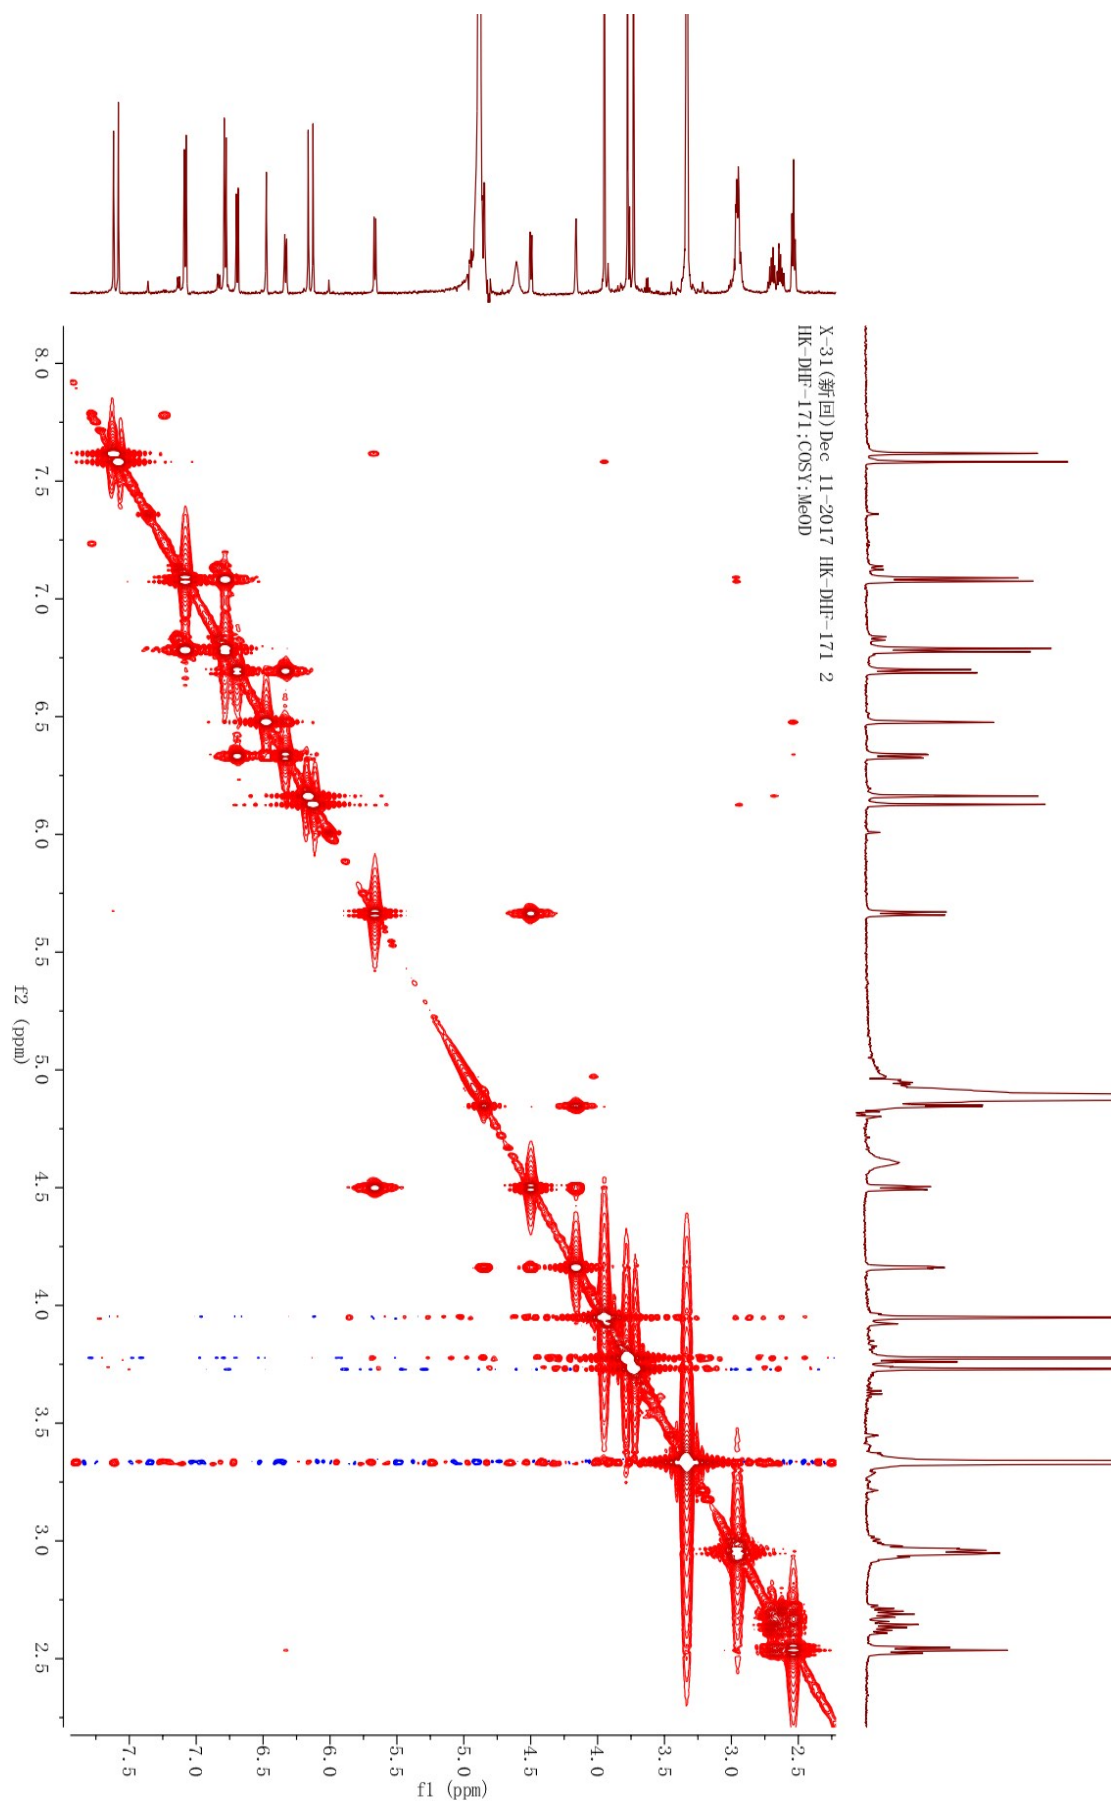

**Figure S27.**  $^1\text{H}$ - $^1\text{H}$  COSY spectrum of compound **4** in  $\text{CD}_3\text{OD}$ .

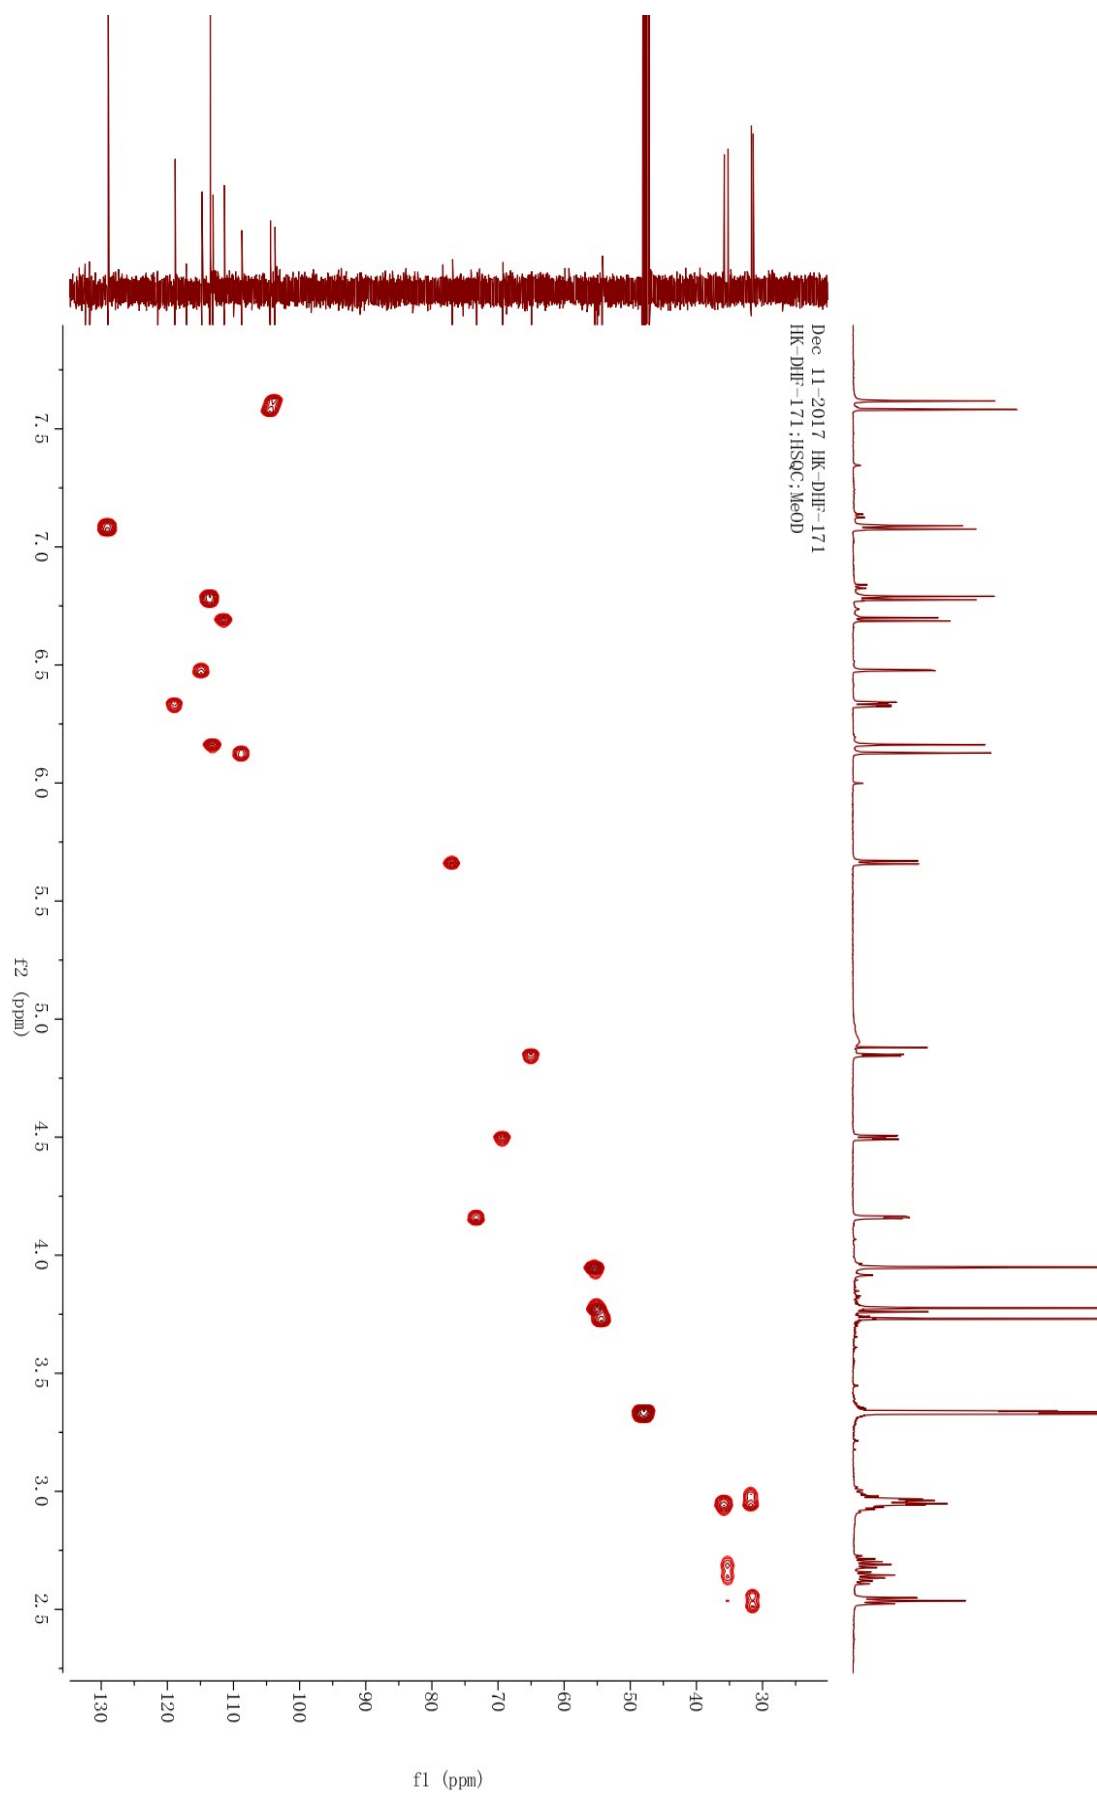

**Figure S28.** HSQC spectrum of compound **4** in  $\text{CD}_3\text{OD}$ .



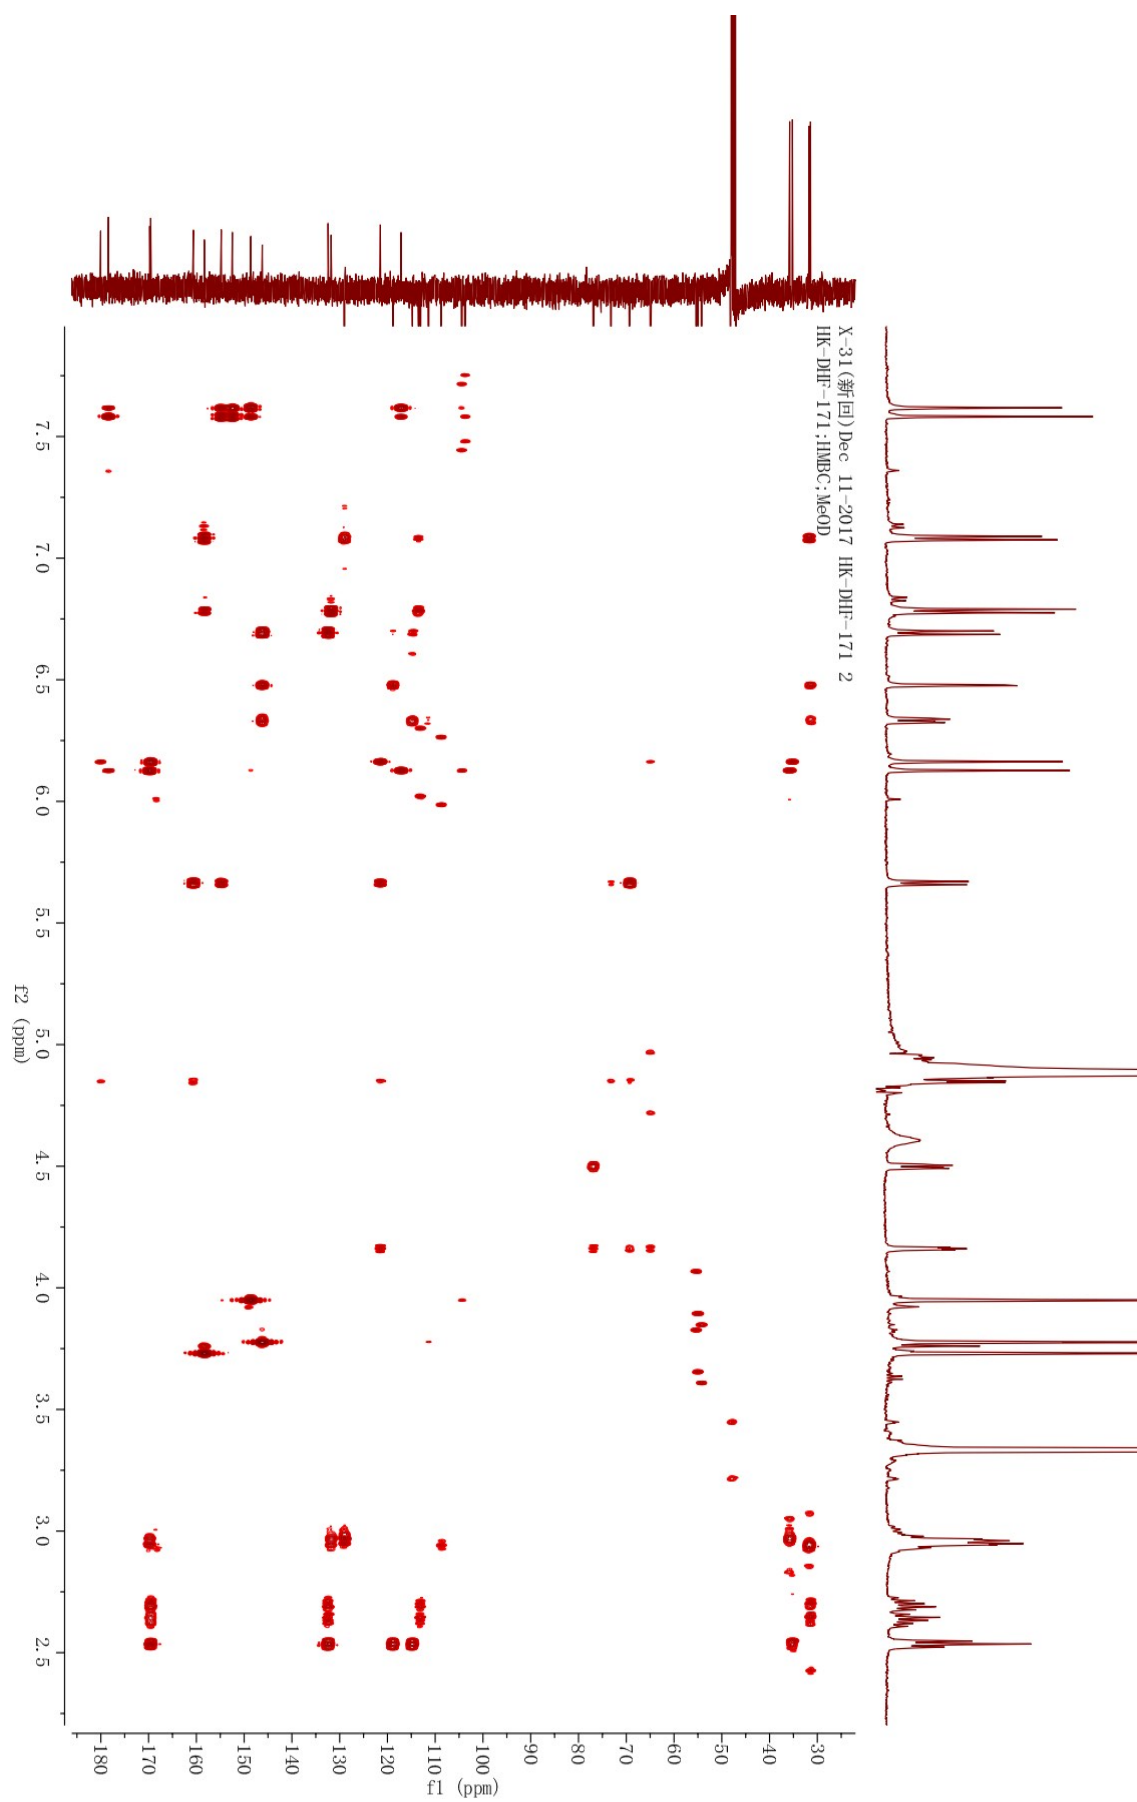

**Figure S29.** HMBC spectrum of compound **4** in CD<sub>3</sub>OD.

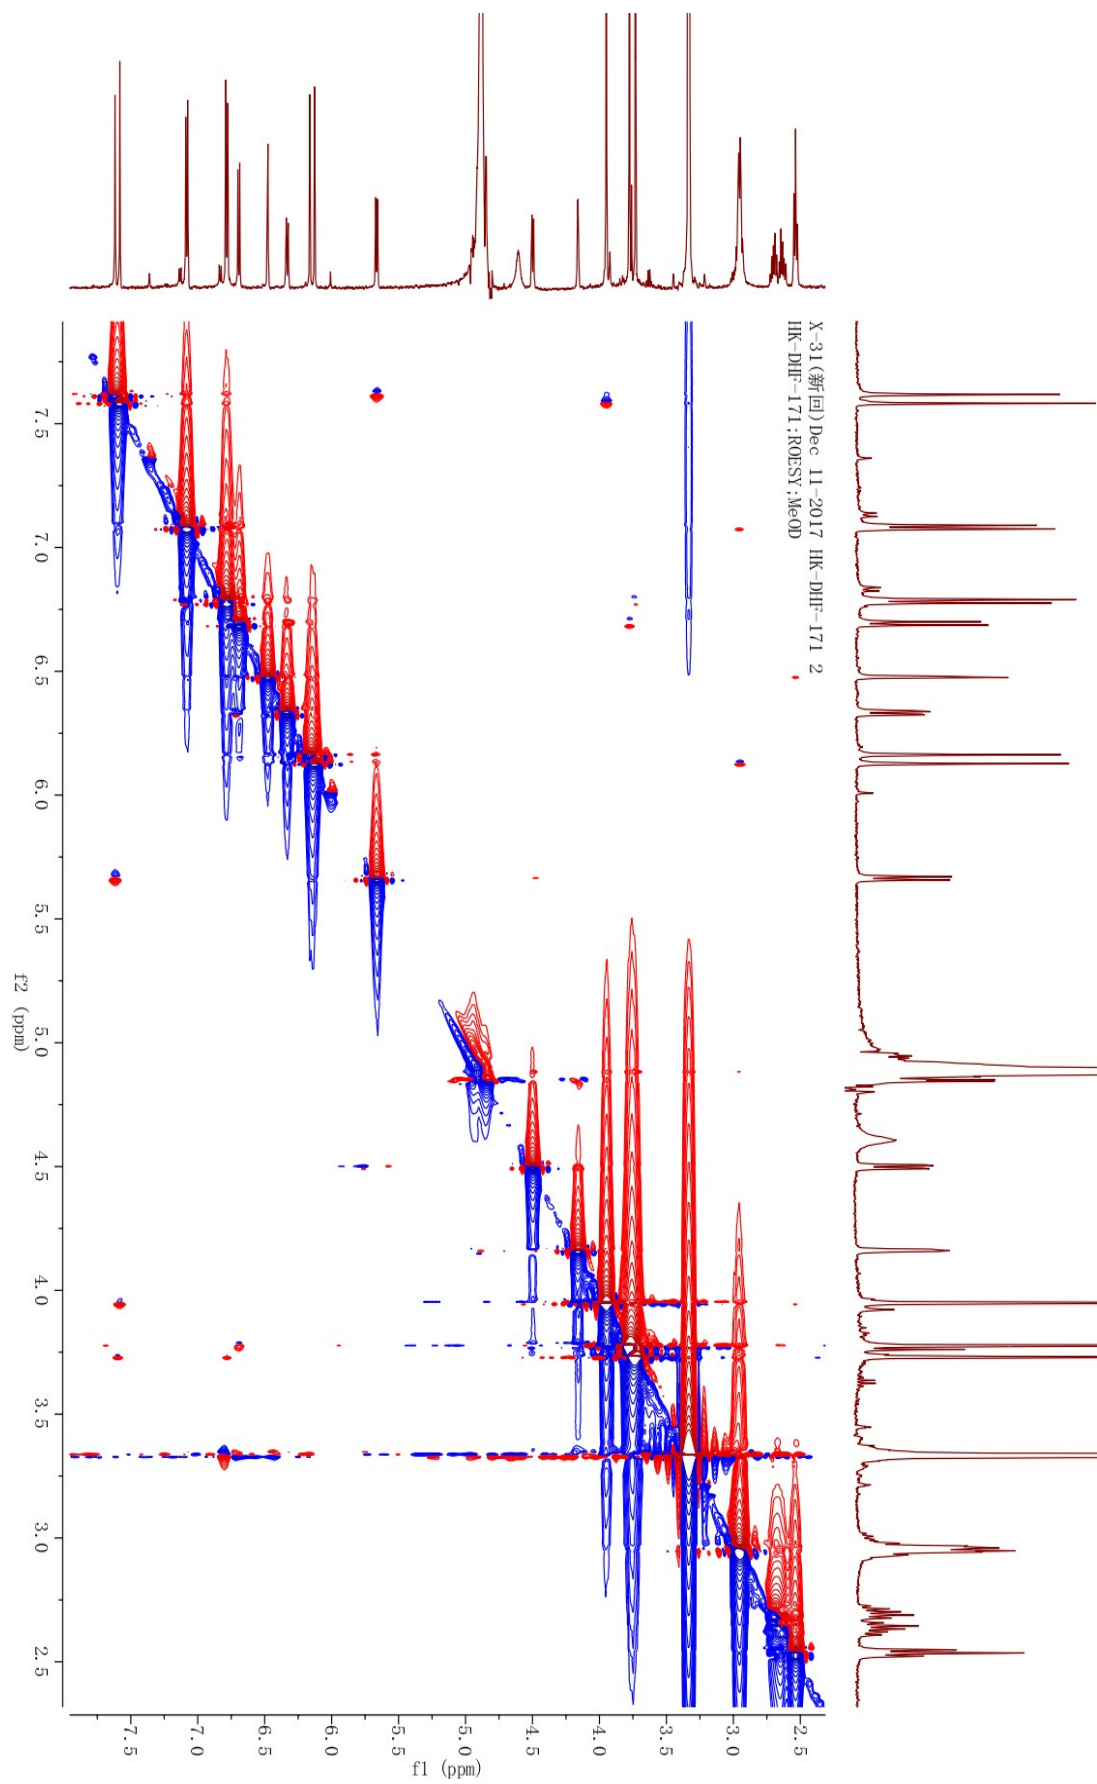

**Figure S30.** ROESY spectrum of compound **4** in CD<sub>3</sub>OD.

## Qualitative Analysis Report

|                        |              |               |                     |
|------------------------|--------------|---------------|---------------------|
| Data Filename          | HK-DHF-73.d  | Sample Name   | HK-DHF-73           |
| Sample Type            | Sample       | Position      | P1-D1               |
| Instrument Name        | Instrument 1 | User Name     |                     |
| Acq Method             | SIBU.m       | Acquired Time | 2/1/2018 2:35:03 PM |
| IRM Calibration Status | Success      | DA Method     | Default.m           |
| Comment                |              |               |                     |

|                |                             |       |
|----------------|-----------------------------|-------|
| Sample Group   |                             | Info. |
| Acquisition SW | 6200 series TOF/6500 series |       |
| Version        | Q-TOF B.05.01 (85125.2)     |       |

### User Spectra

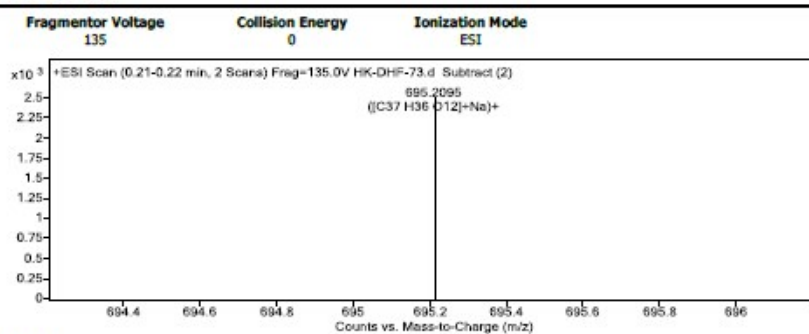

#### Peak List

| m/z      | z | Abund    |
|----------|---|----------|
| 407.7925 | 2 | 6024.41  |
| 418.7835 | 2 | 5888.34  |
| 475.3261 | 2 | 5912.81  |
| 701.4931 | 1 | 18174.44 |
| 702.4971 | 1 | 7817.4   |
| 814.5776 | 1 | 16452.2  |
| 815.5804 | 1 | 7787.79  |
| 927.661  | 1 | 4873.8   |

#### Formula Calculator Element Limits

| Element | Min | Max |
|---------|-----|-----|
| C       | 3   | 60  |
| H       | 0   | 120 |
| O       | 0   | 30  |

#### Formula Calculator Results

| Formula     | CalculatedMass | CalculatedMz | Mz       | Diff. (mDa) | Diff. (ppm) | DBE     |
|-------------|----------------|--------------|----------|-------------|-------------|---------|
| C37 H36 O12 | 672.2207       | 695.2099     | 695.2095 | 0.40        | 0.58        | 20.0000 |

--- End Of Report ---

**Figure S31.** HRESIMS spectrum of compound 4.

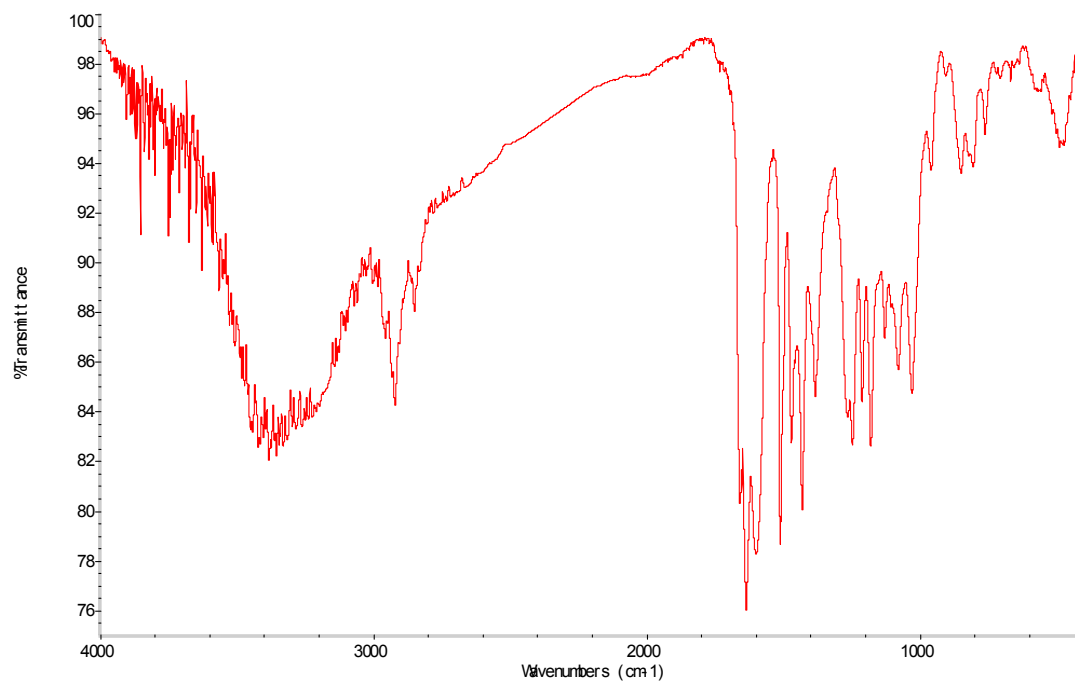

**Figure S32.** IR spectrum of compound 4.

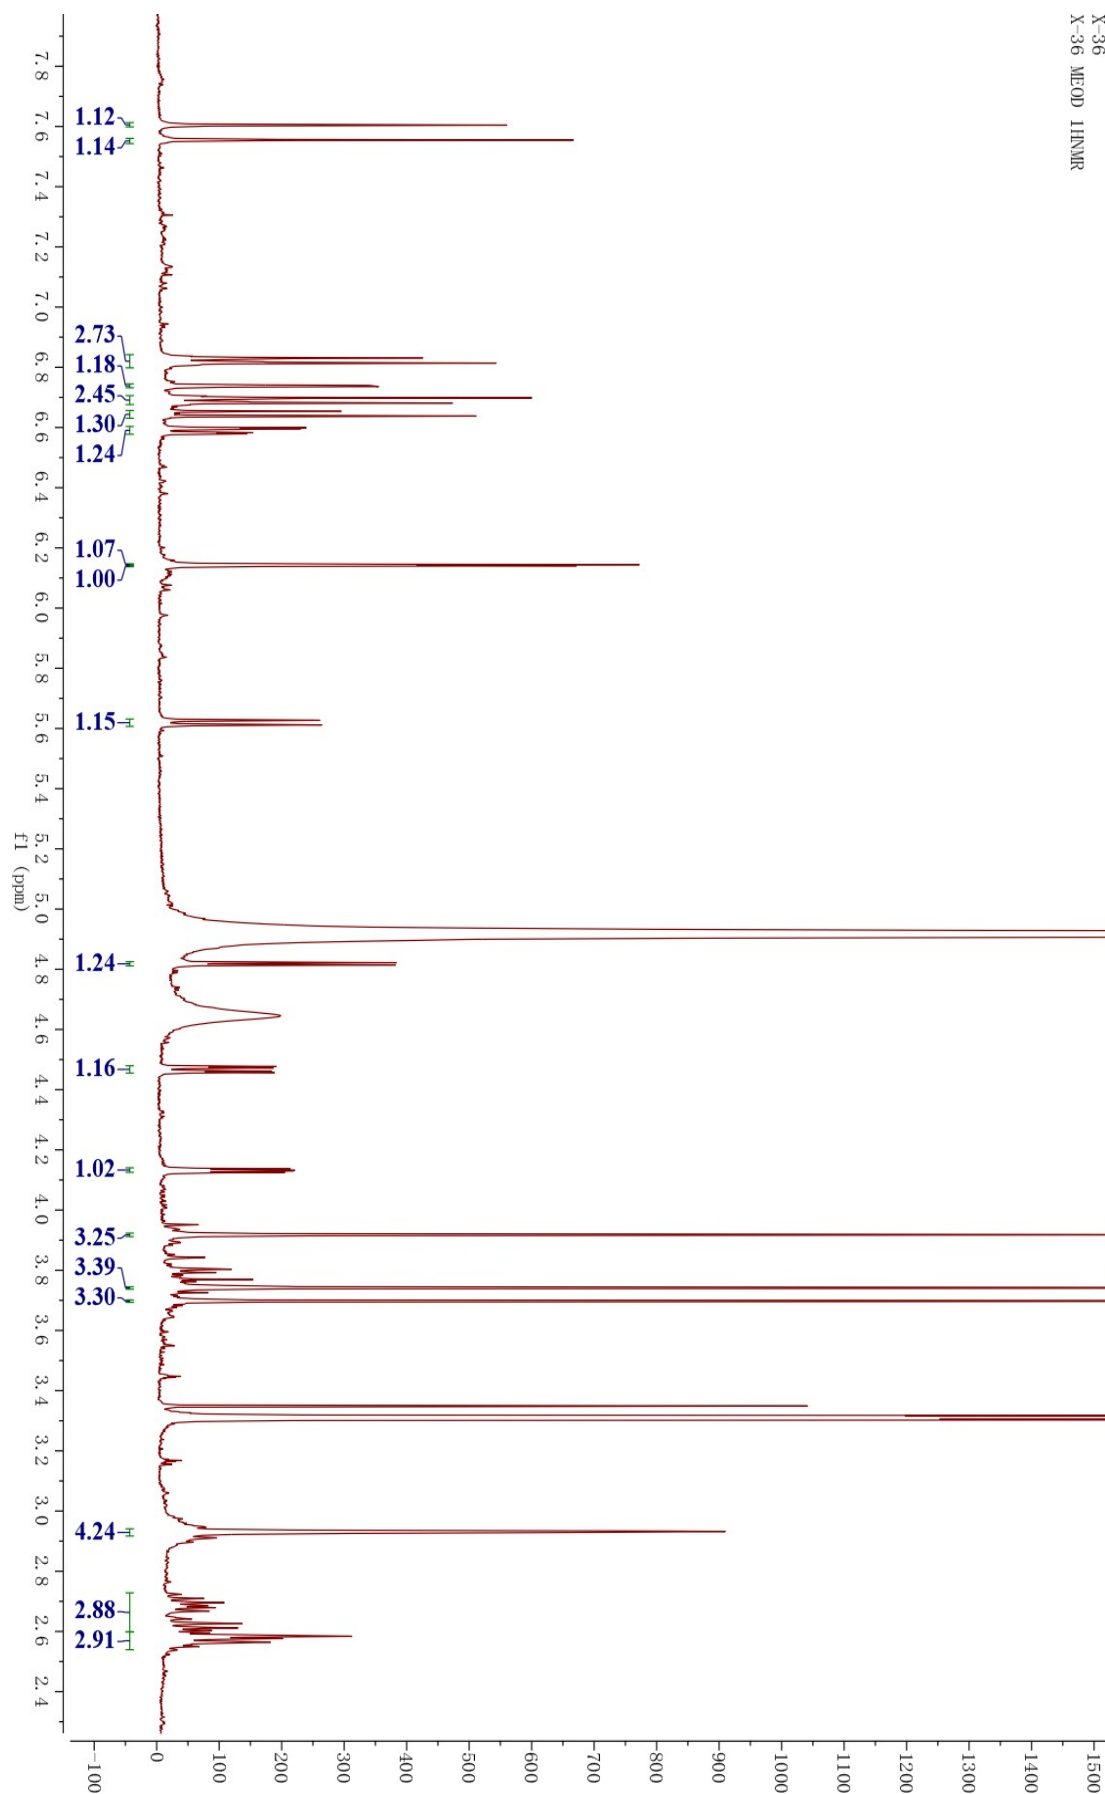

Figure S33. <sup>1</sup>H NMR spectrum (500 MHz) of compound 5 in CD<sub>3</sub>OD.

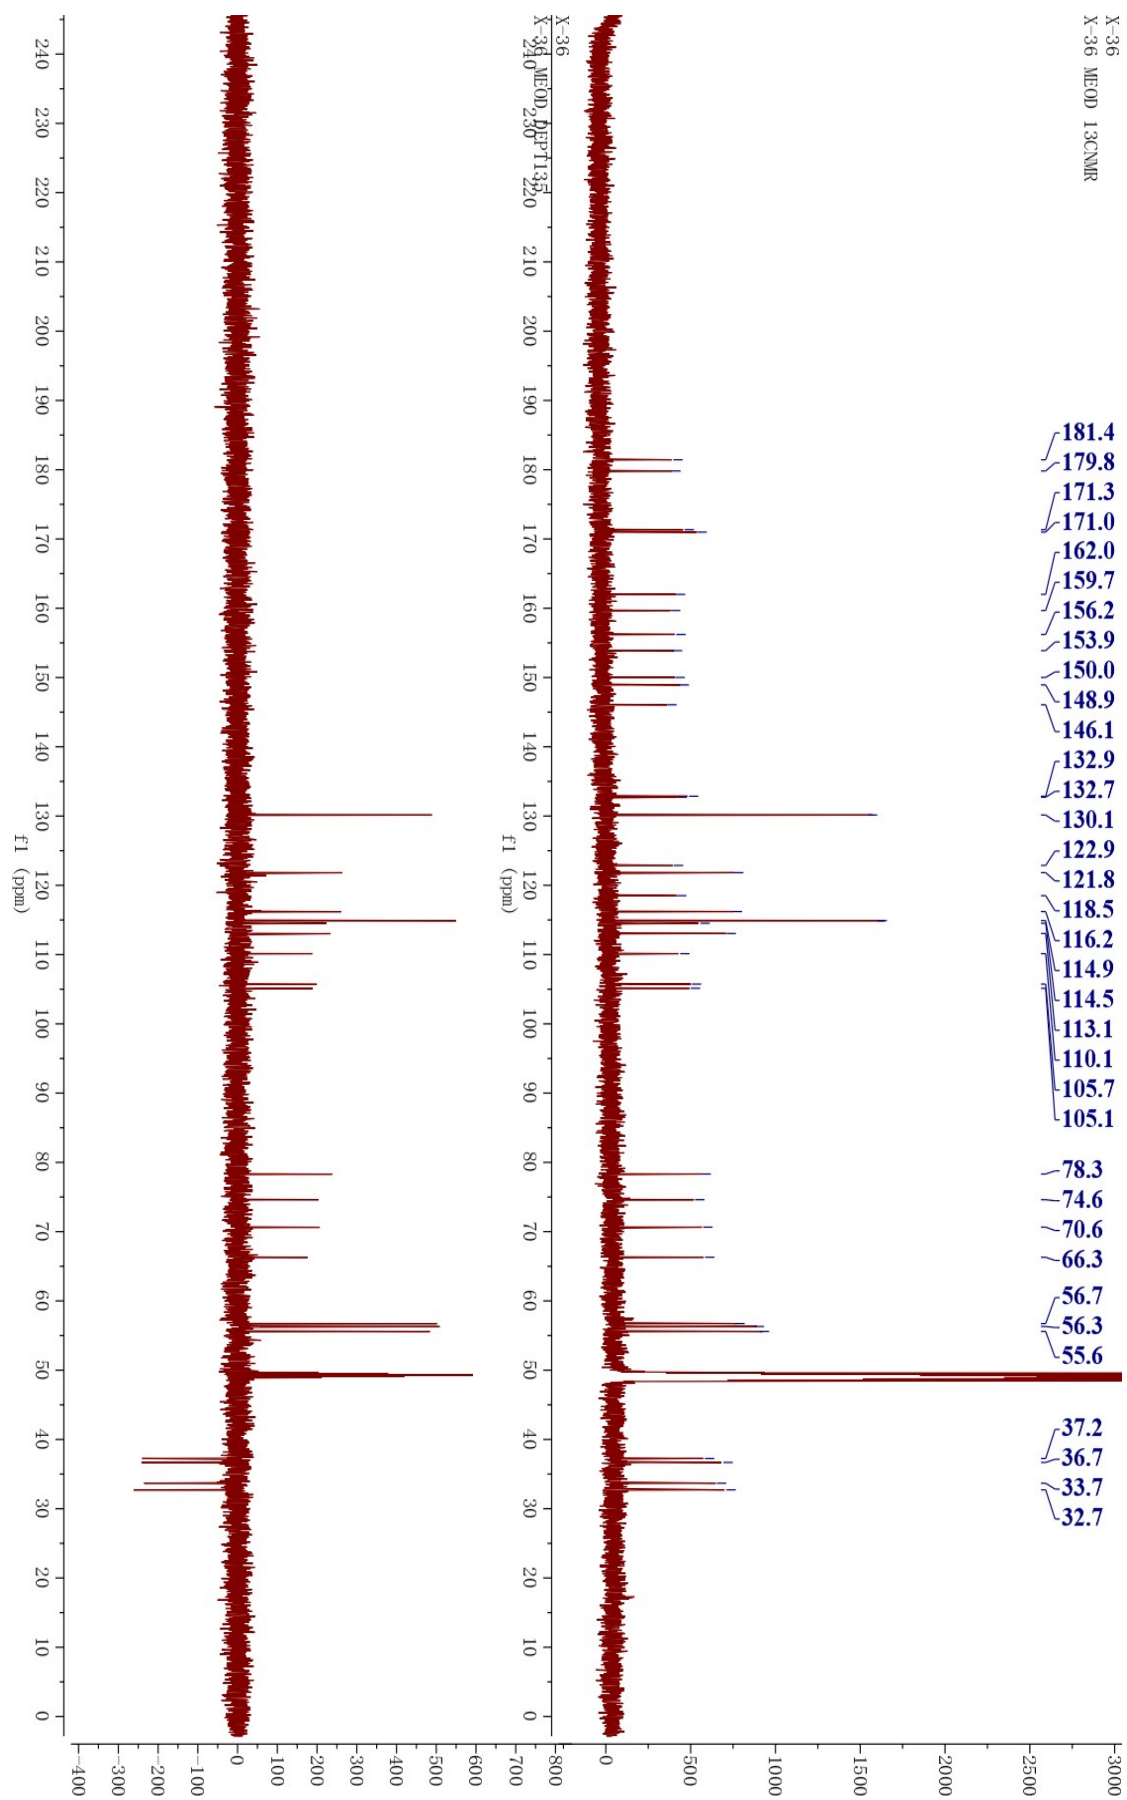

**Figure S34.**  $^{13}\text{C}$  NMR spectrum (125 MHz) of compound **5** in  $\text{CD}_3\text{OD}$ .

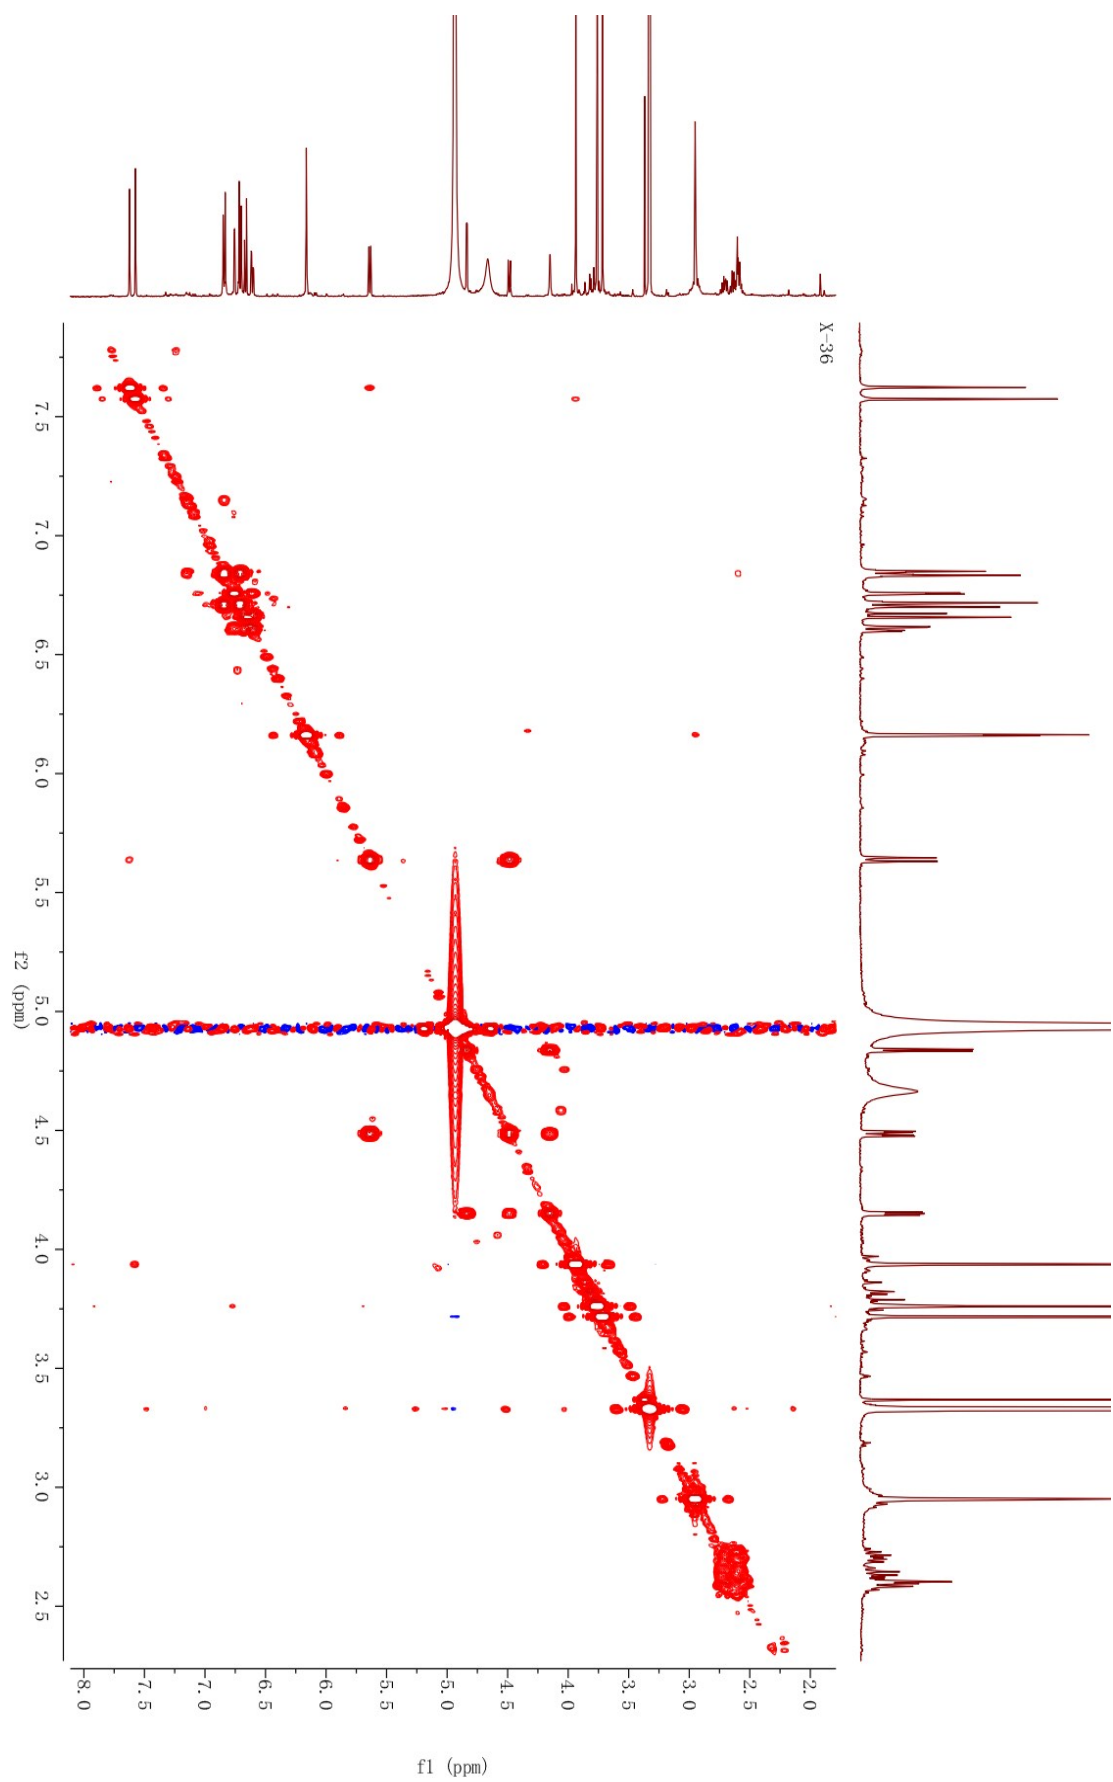

**Figure S35.**  $^1\text{H}$ - $^1\text{H}$  COSY spectrum of compound **5** in  $\text{CD}_3\text{OD}$ .

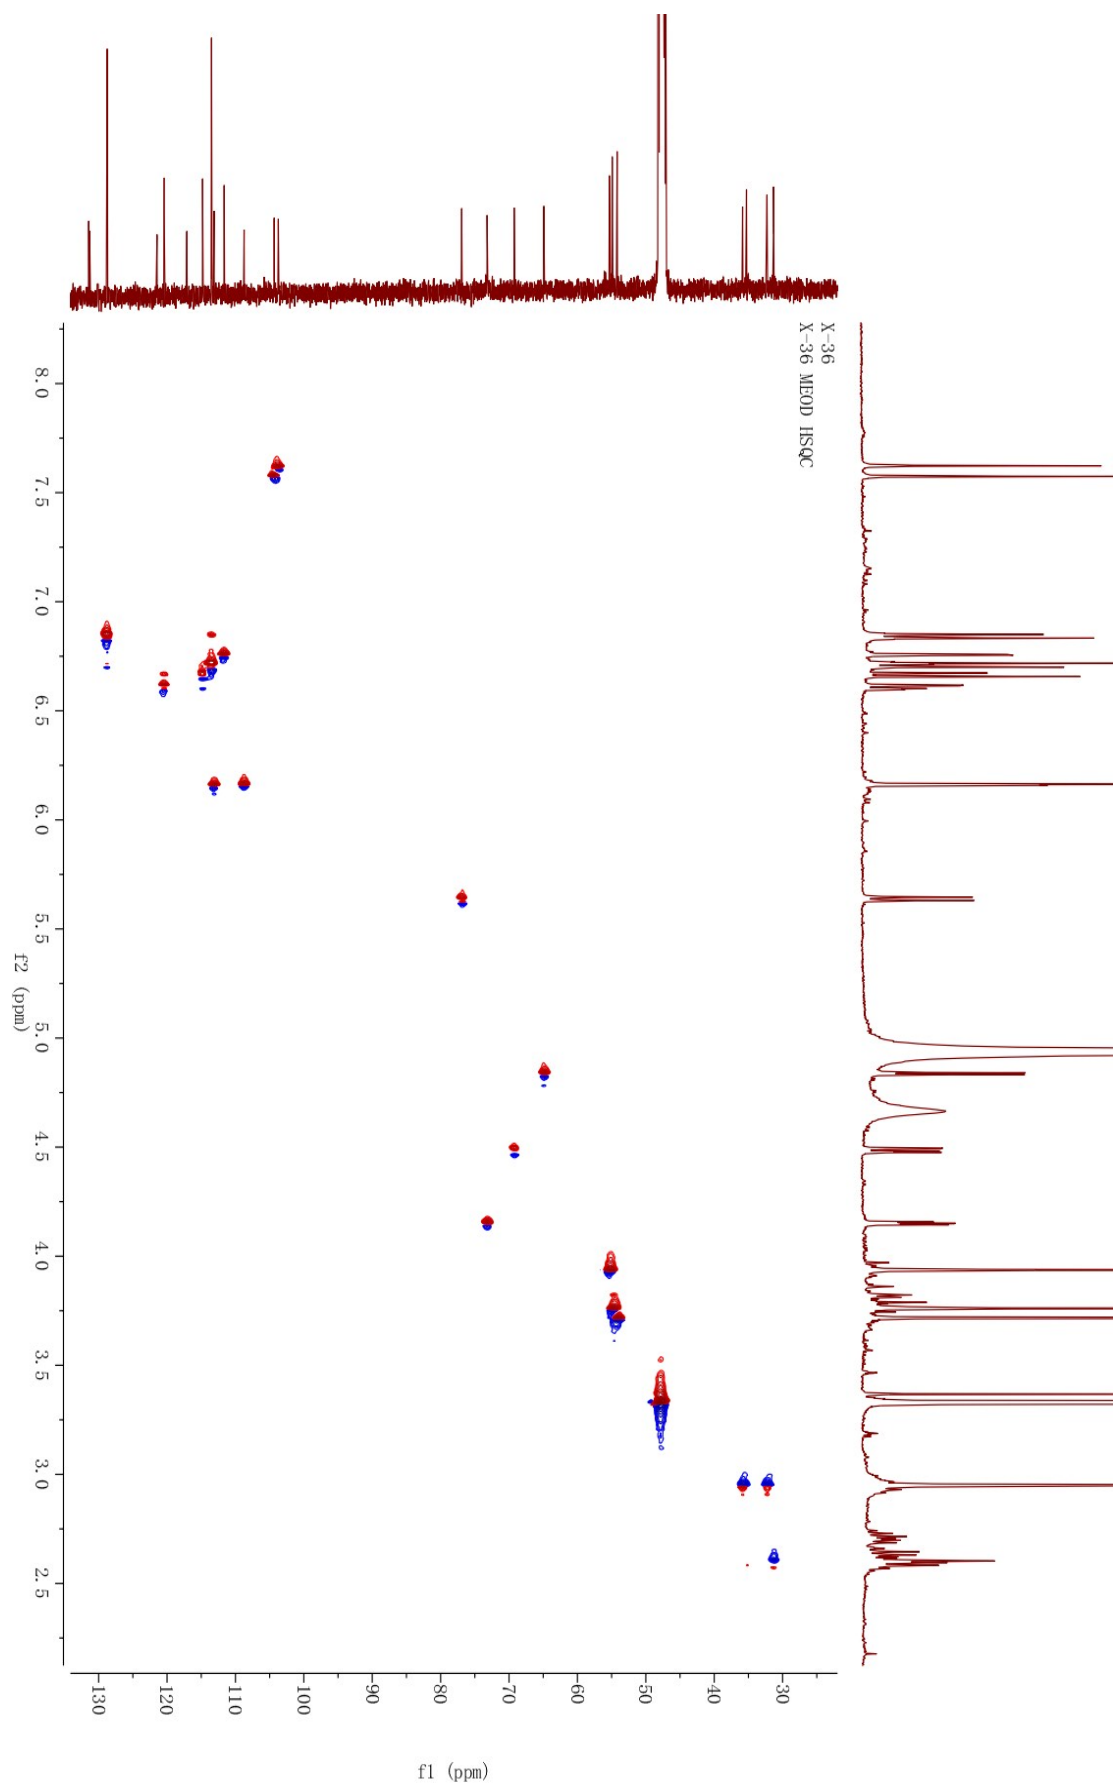

**Figure S36.** HSQC spectrum of compound **5** in CD<sub>3</sub>OD.



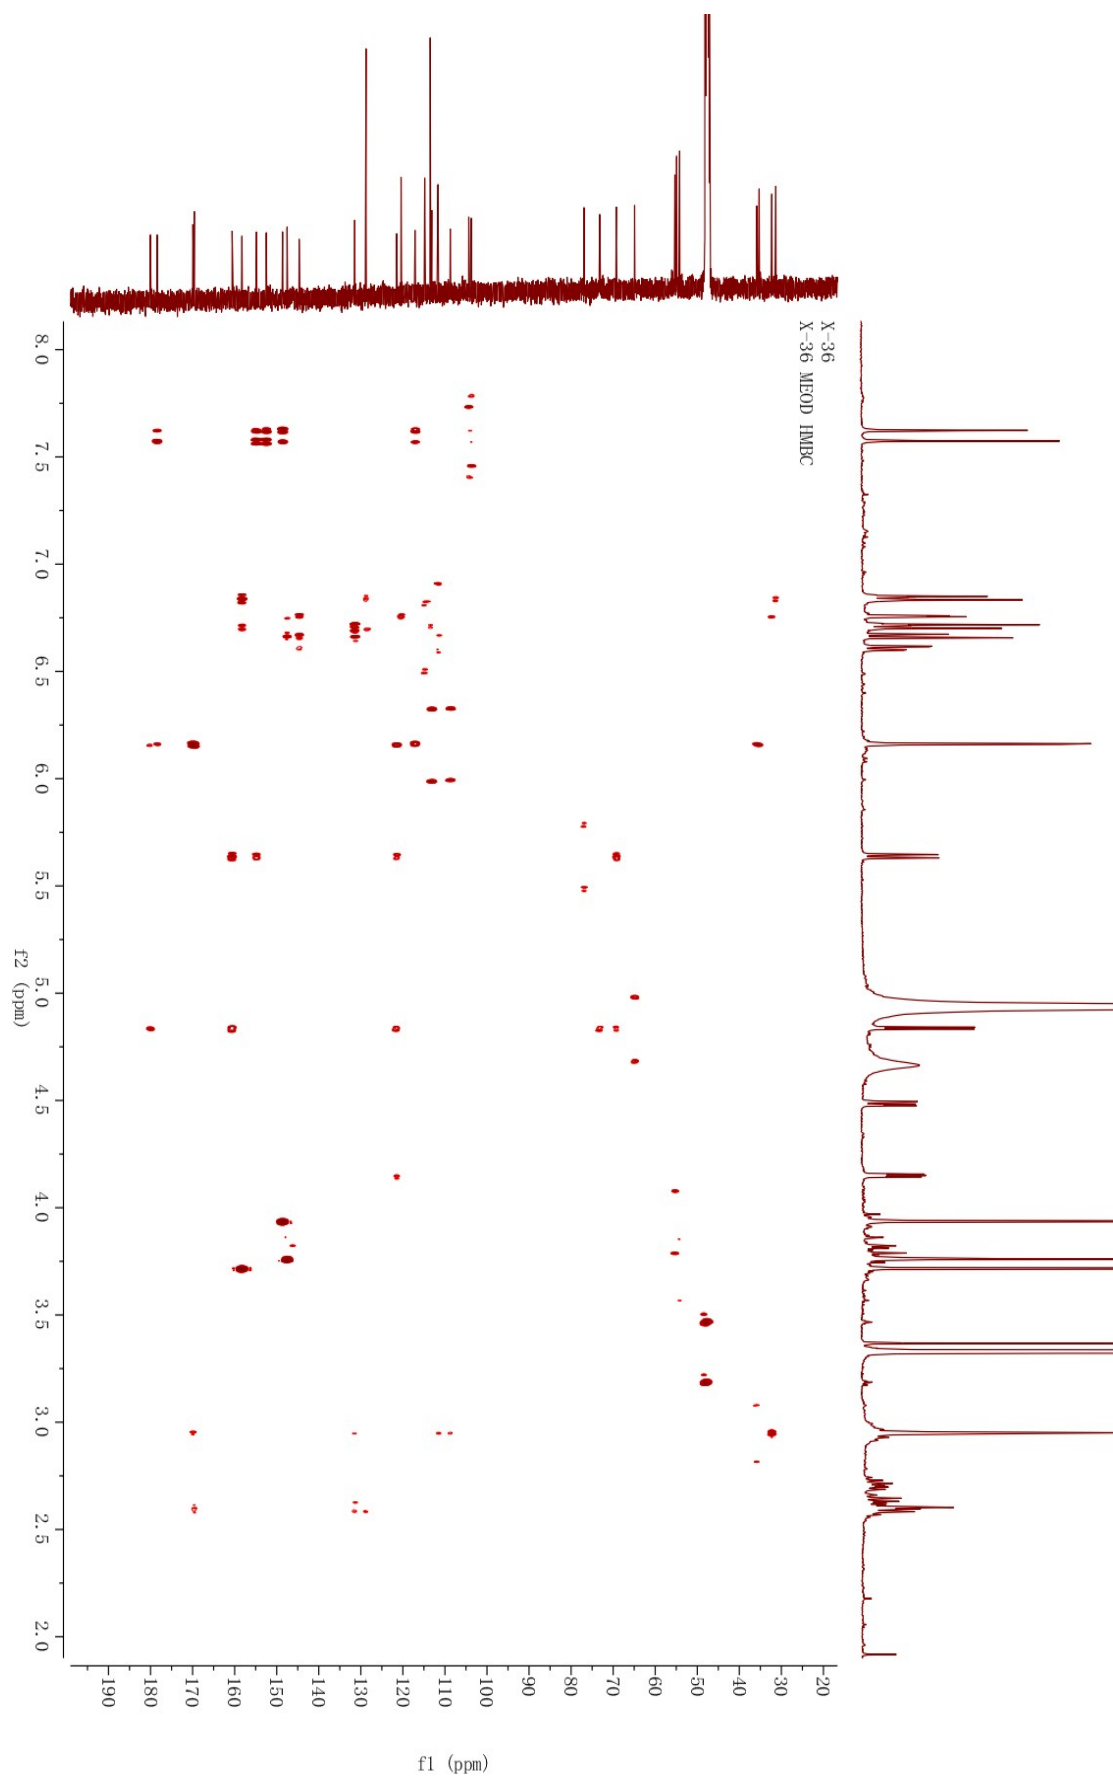

**Figure S37.** HMBC spectrum of compound **5** in CD<sub>3</sub>OD.

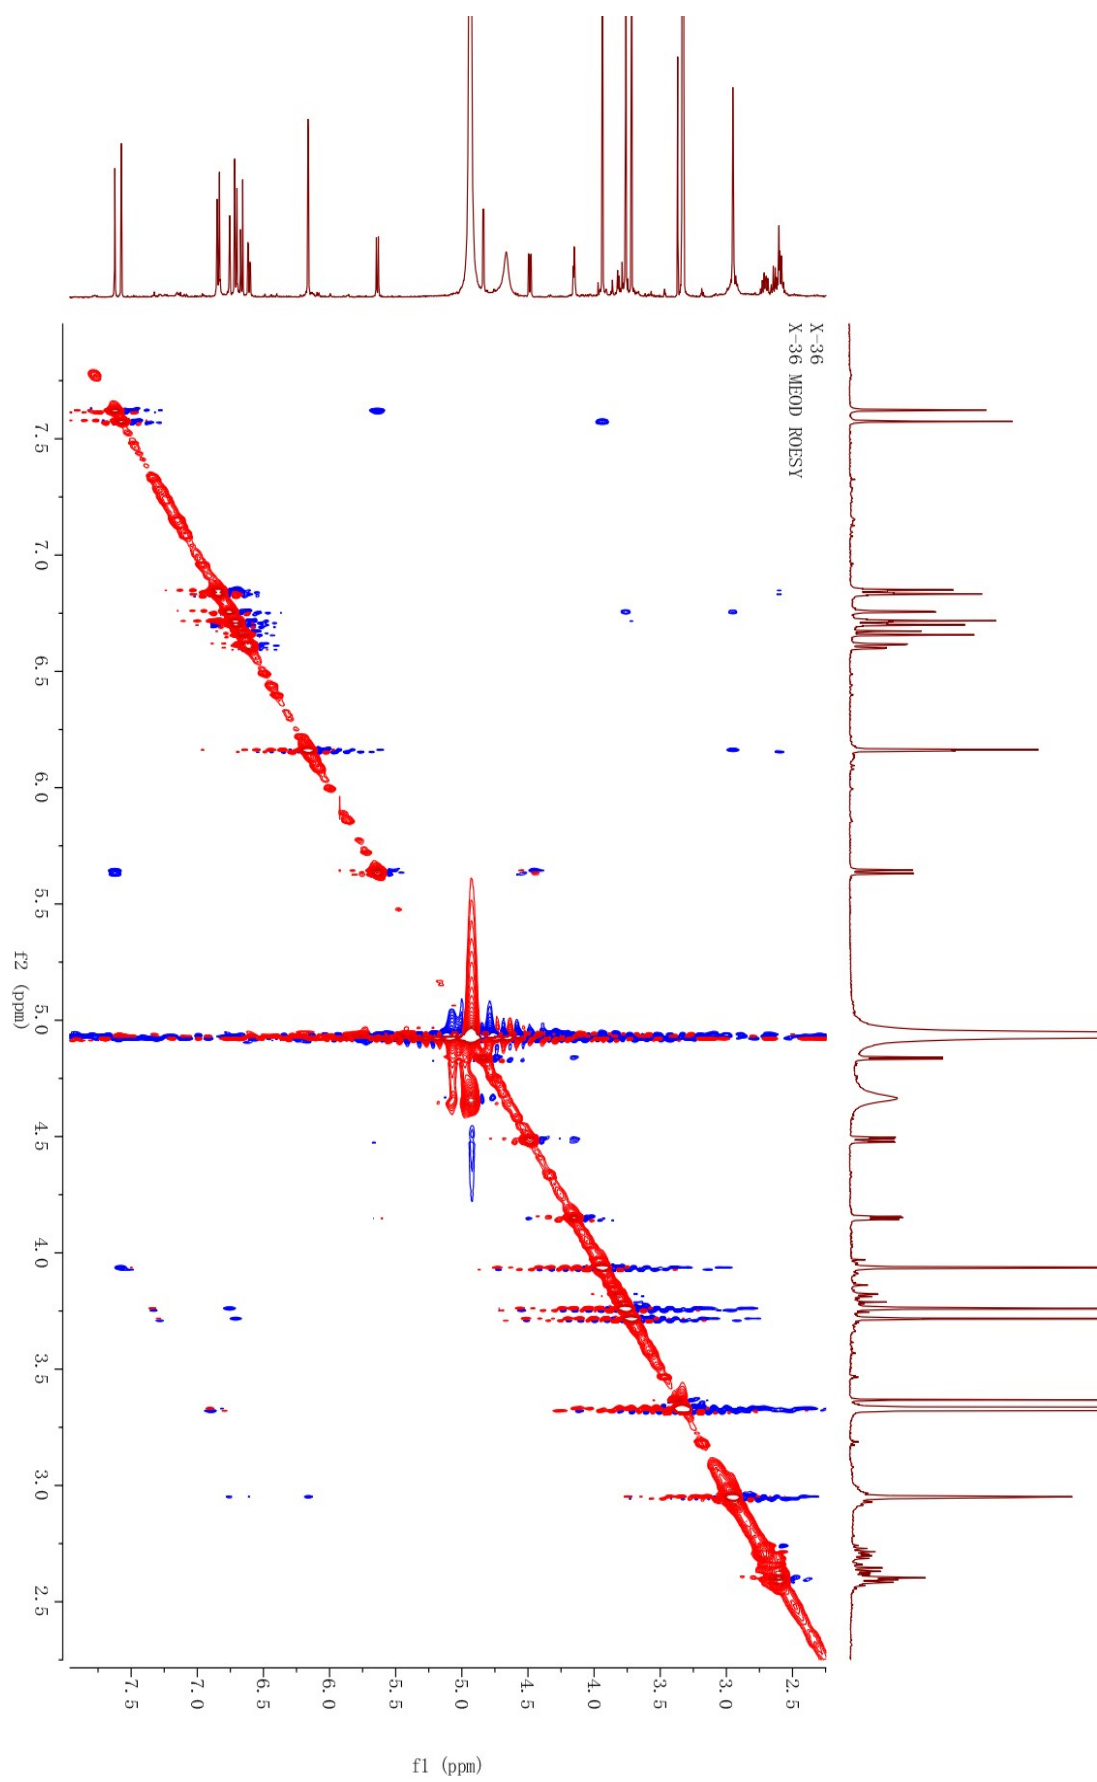

**Figure S38.** ROESY spectrum of compound **5** in CD<sub>3</sub>OD.

## Qualitative Analysis Report

|                        |                             |               |                     |
|------------------------|-----------------------------|---------------|---------------------|
| Data Filename          | HK-DHF-74.d                 | Sample Name   | HK-DHF-74           |
| Sample Type            | Sample                      | Position      | P1-D2               |
| Instrument Name        | Instrument 1                | User Name     |                     |
| Acq Method             | SIBU.m                      | Acquired Time | 2/1/2018 2:36:25 PM |
| IRM Calibration Status | Success                     | DA Method     | Default.m           |
| Comment                |                             |               |                     |
| Sample Group           |                             | Info.         |                     |
| Acquisition SW         | 6200 series TOF/6500 series |               |                     |
| Version                | Q-TOF B.05.01 (B5125.2)     |               |                     |

### User Spectra

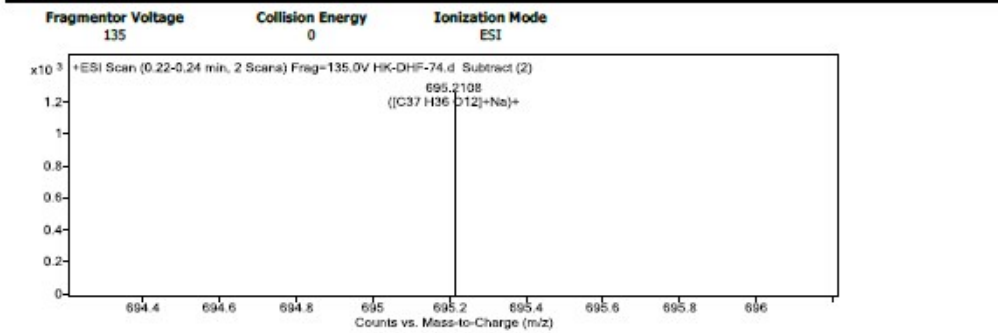

#### Peak List

| m/z      | z | Abund    |
|----------|---|----------|
| 212.116  | 1 | 3340.93  |
| 246.2423 |   | 2541.65  |
| 274.2739 | 1 | 21890.75 |
| 275.2766 | 1 | 3753.26  |
| 302.3051 | 1 | 3578.05  |
| 318.3004 | 1 | 10426.92 |
| 507.2717 | 1 | 2470.15  |
| 523.2463 | 1 | 4448.28  |

#### Formula Calculator Element Limits

| Element | Min | Max |
|---------|-----|-----|
| C       | 3   | 60  |
| H       | 0   | 120 |
| O       | 0   | 30  |

#### Formula Calculator Results

| Formula     | CalculatedMass | CalculatedMz | Mz       | Diff. (mDa) | Diff. (ppm) | DBE     |
|-------------|----------------|--------------|----------|-------------|-------------|---------|
| C37 H36 O12 | 672.2207       | 695.2099     | 695.2108 | -0.90       | -1.29       | 20.0000 |

--- End Of Report ---

**Figure S39.** HRESIMS spectrum of compound **5**.

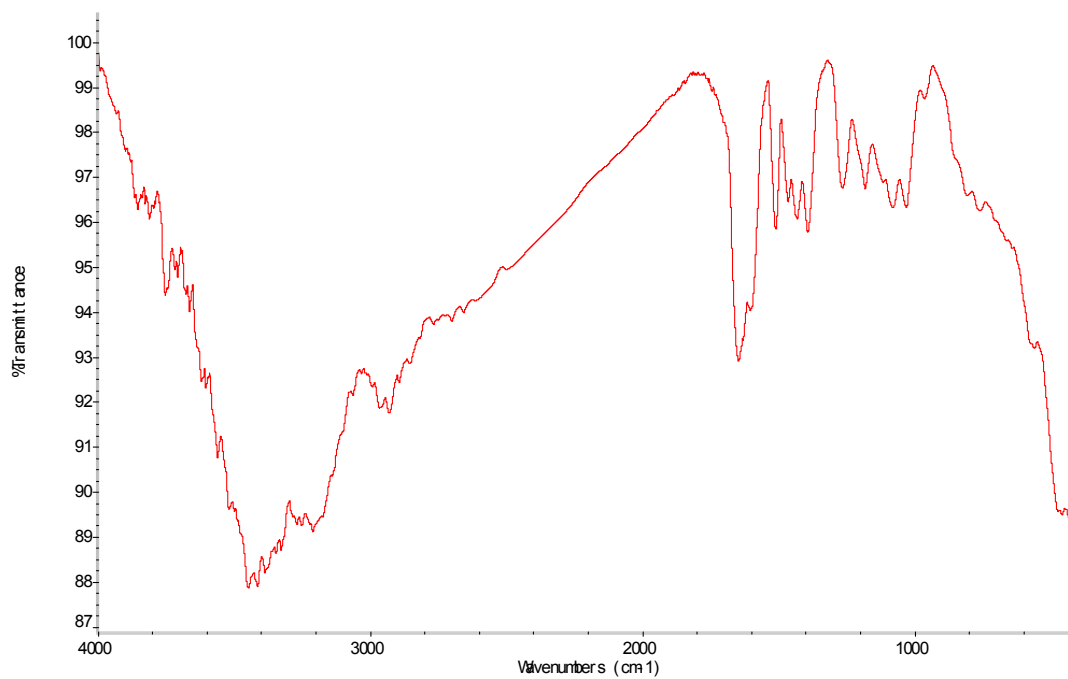

**Figure S40.** IR spectrum of compound **5**.

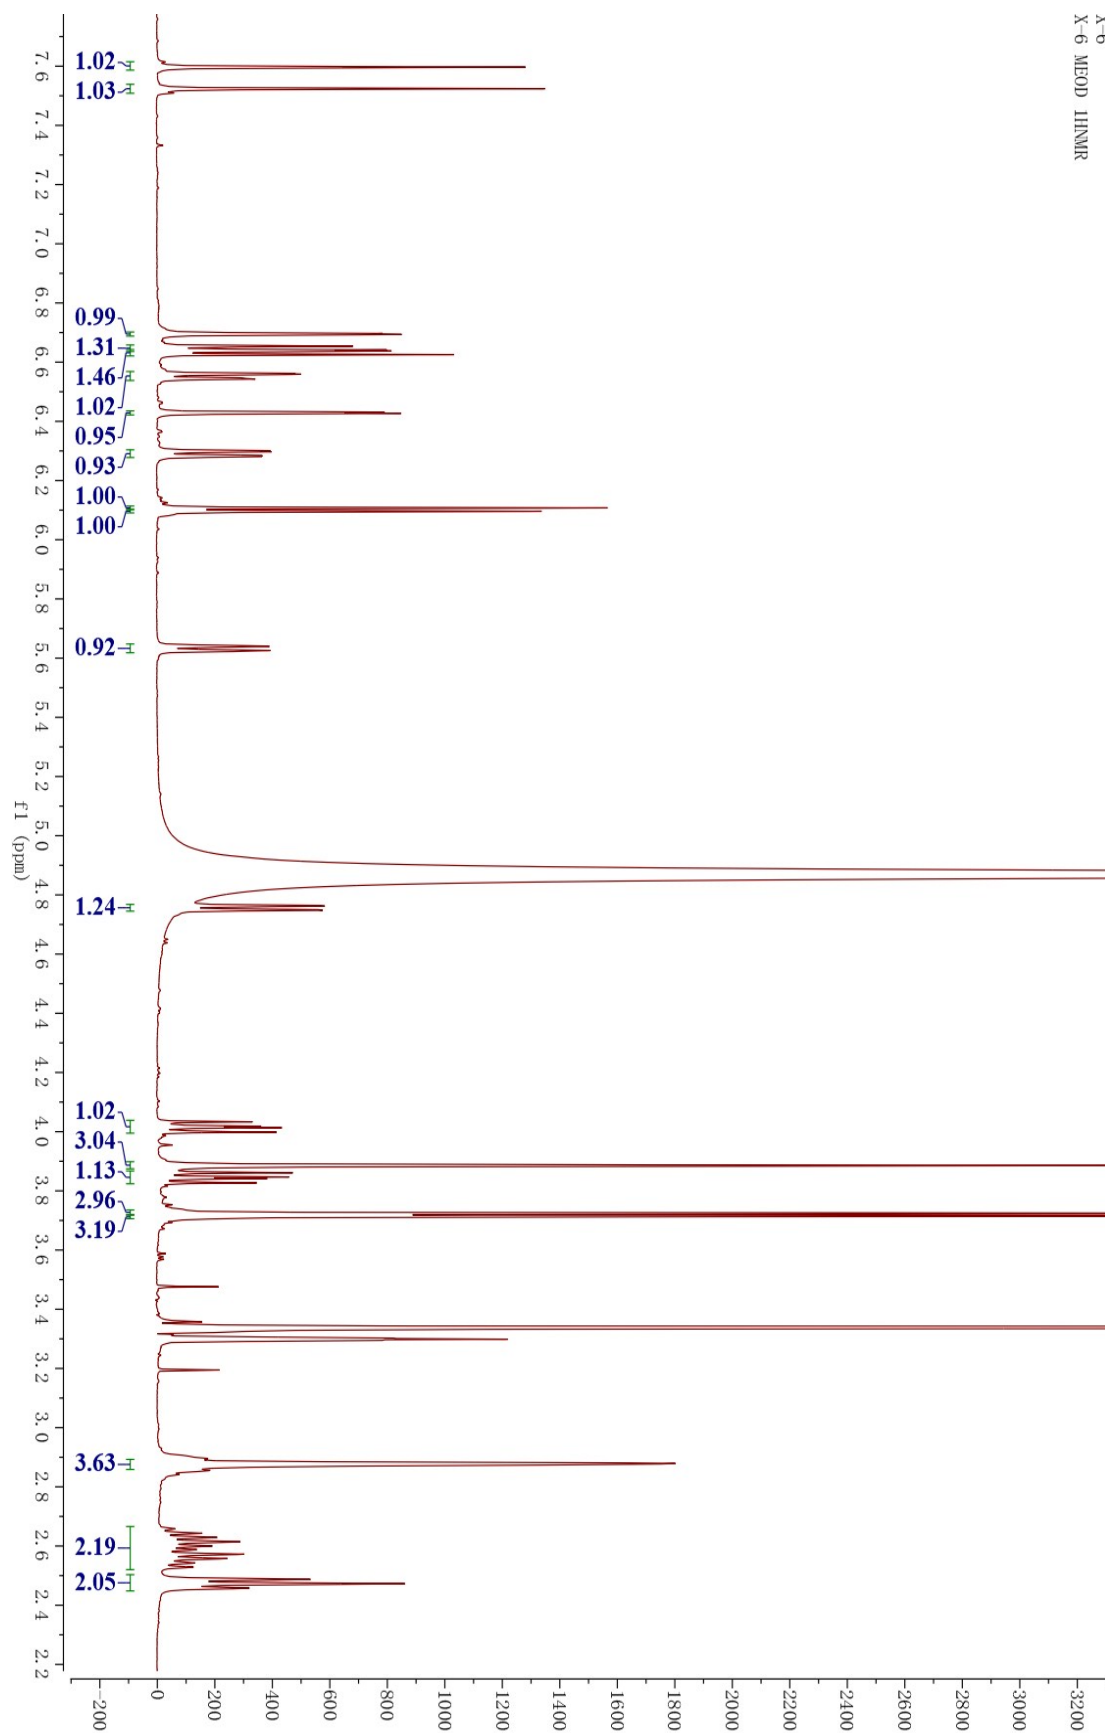

Figure S41. <sup>1</sup>H NMR spectrum (500 MHz) of compound 6 in CD<sub>3</sub>OD.

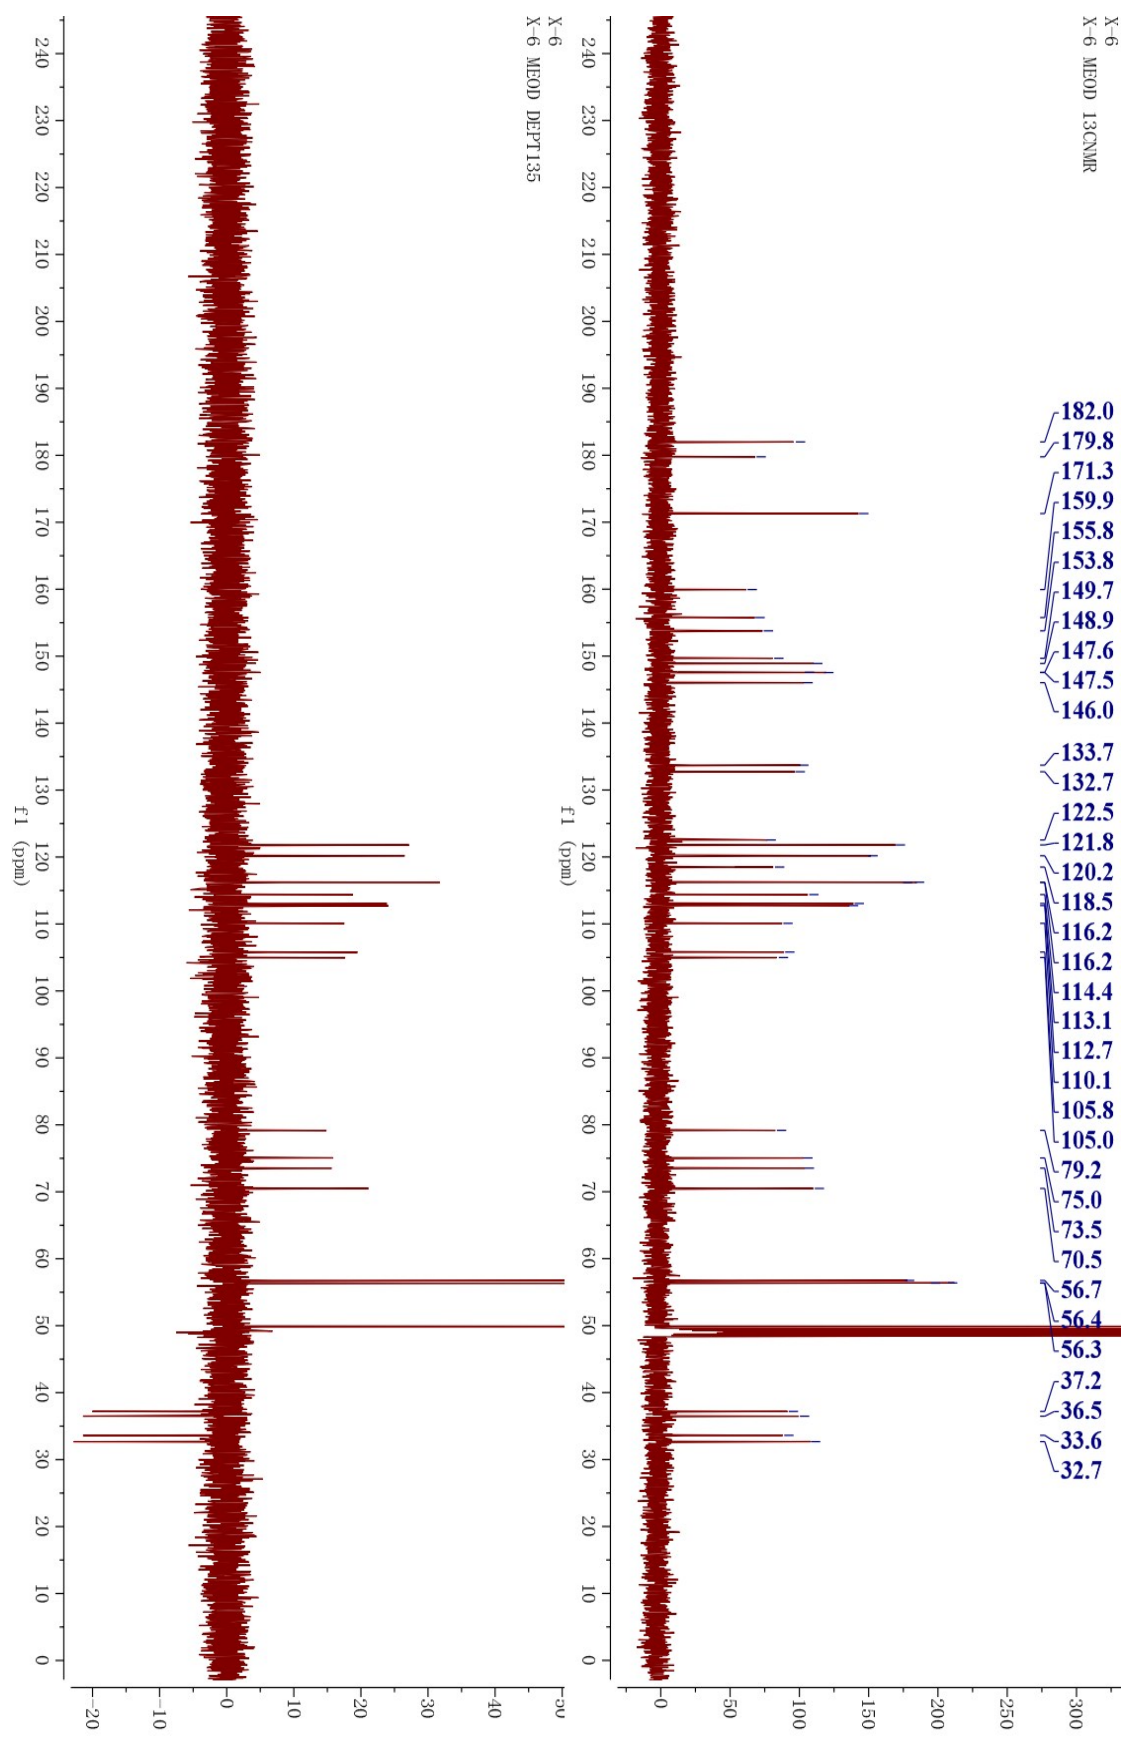

**Figure S42.**  $^{13}\text{C}$  NMR spectrum (125 MHz) of compound **6** in  $\text{CD}_3\text{OD}$ .

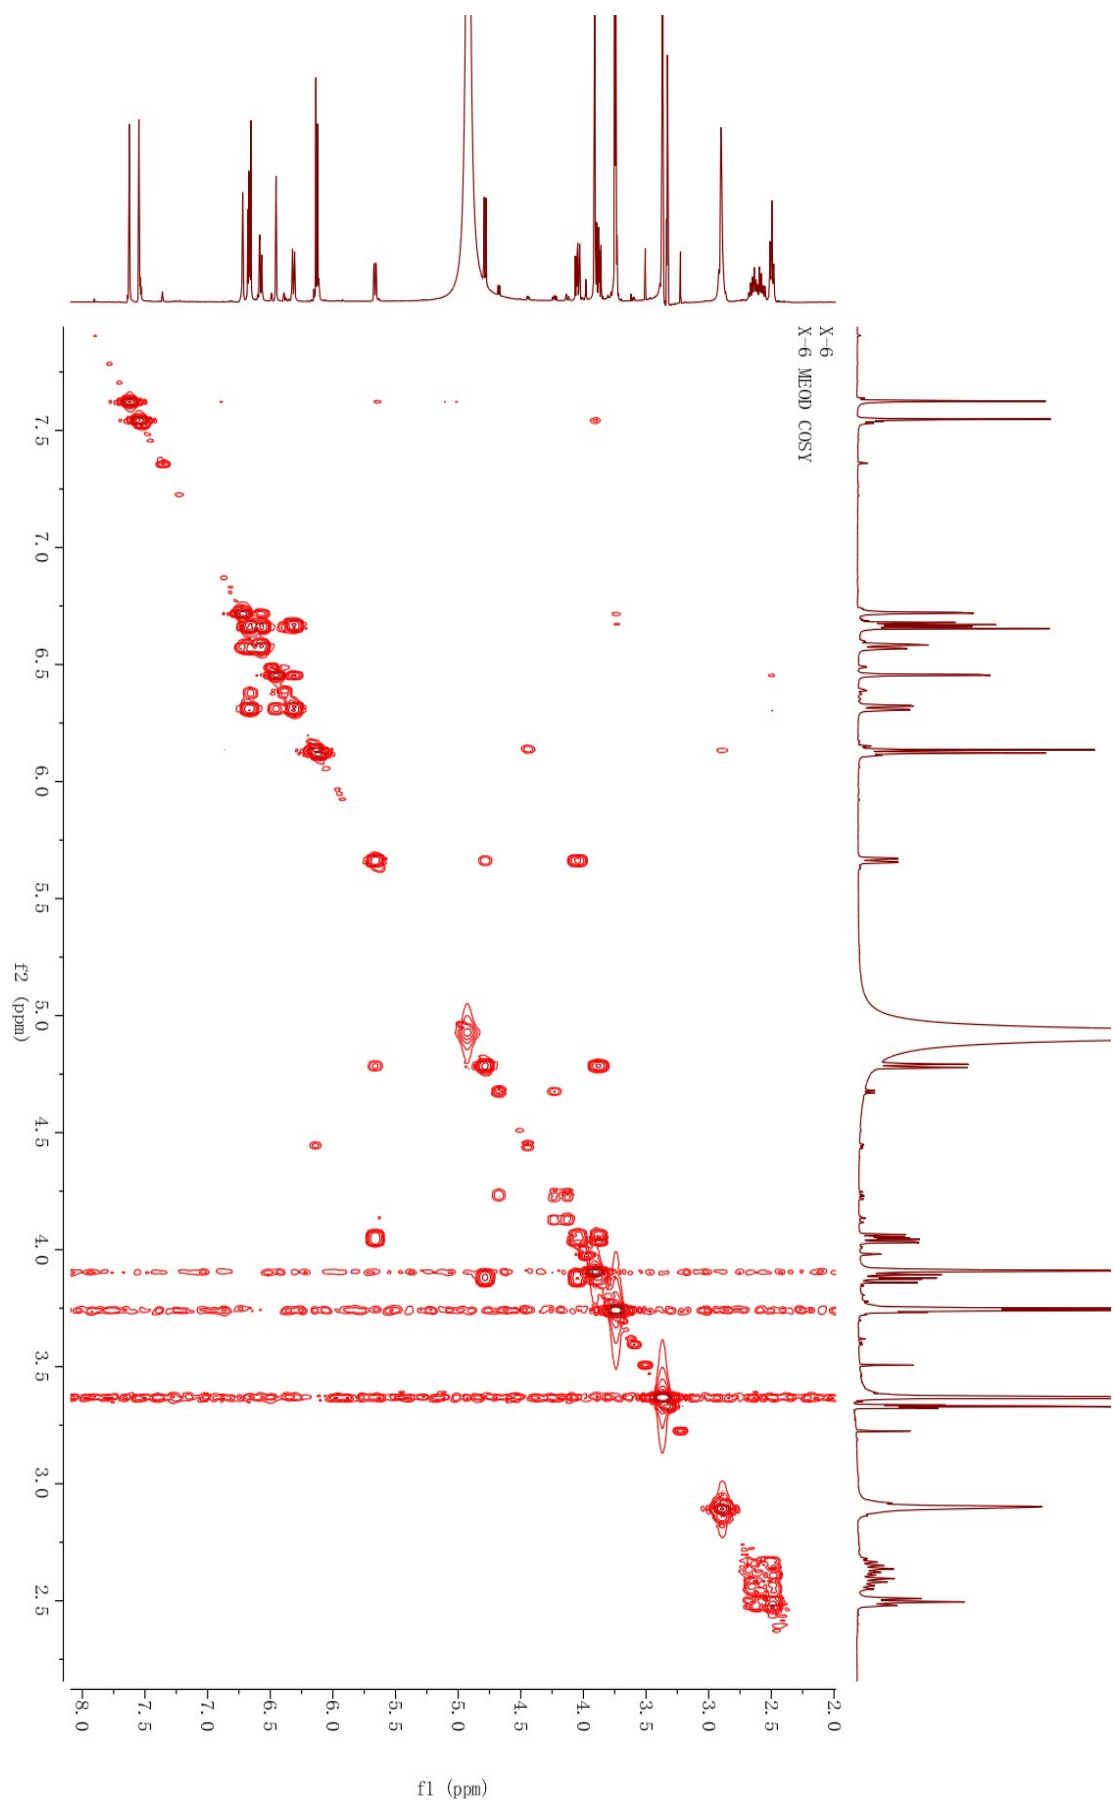

**Figure S43.**  $^1\text{H}$ - $^1\text{H}$  COSY spectrum of compound **6** in  $\text{CD}_3\text{OD}$ .

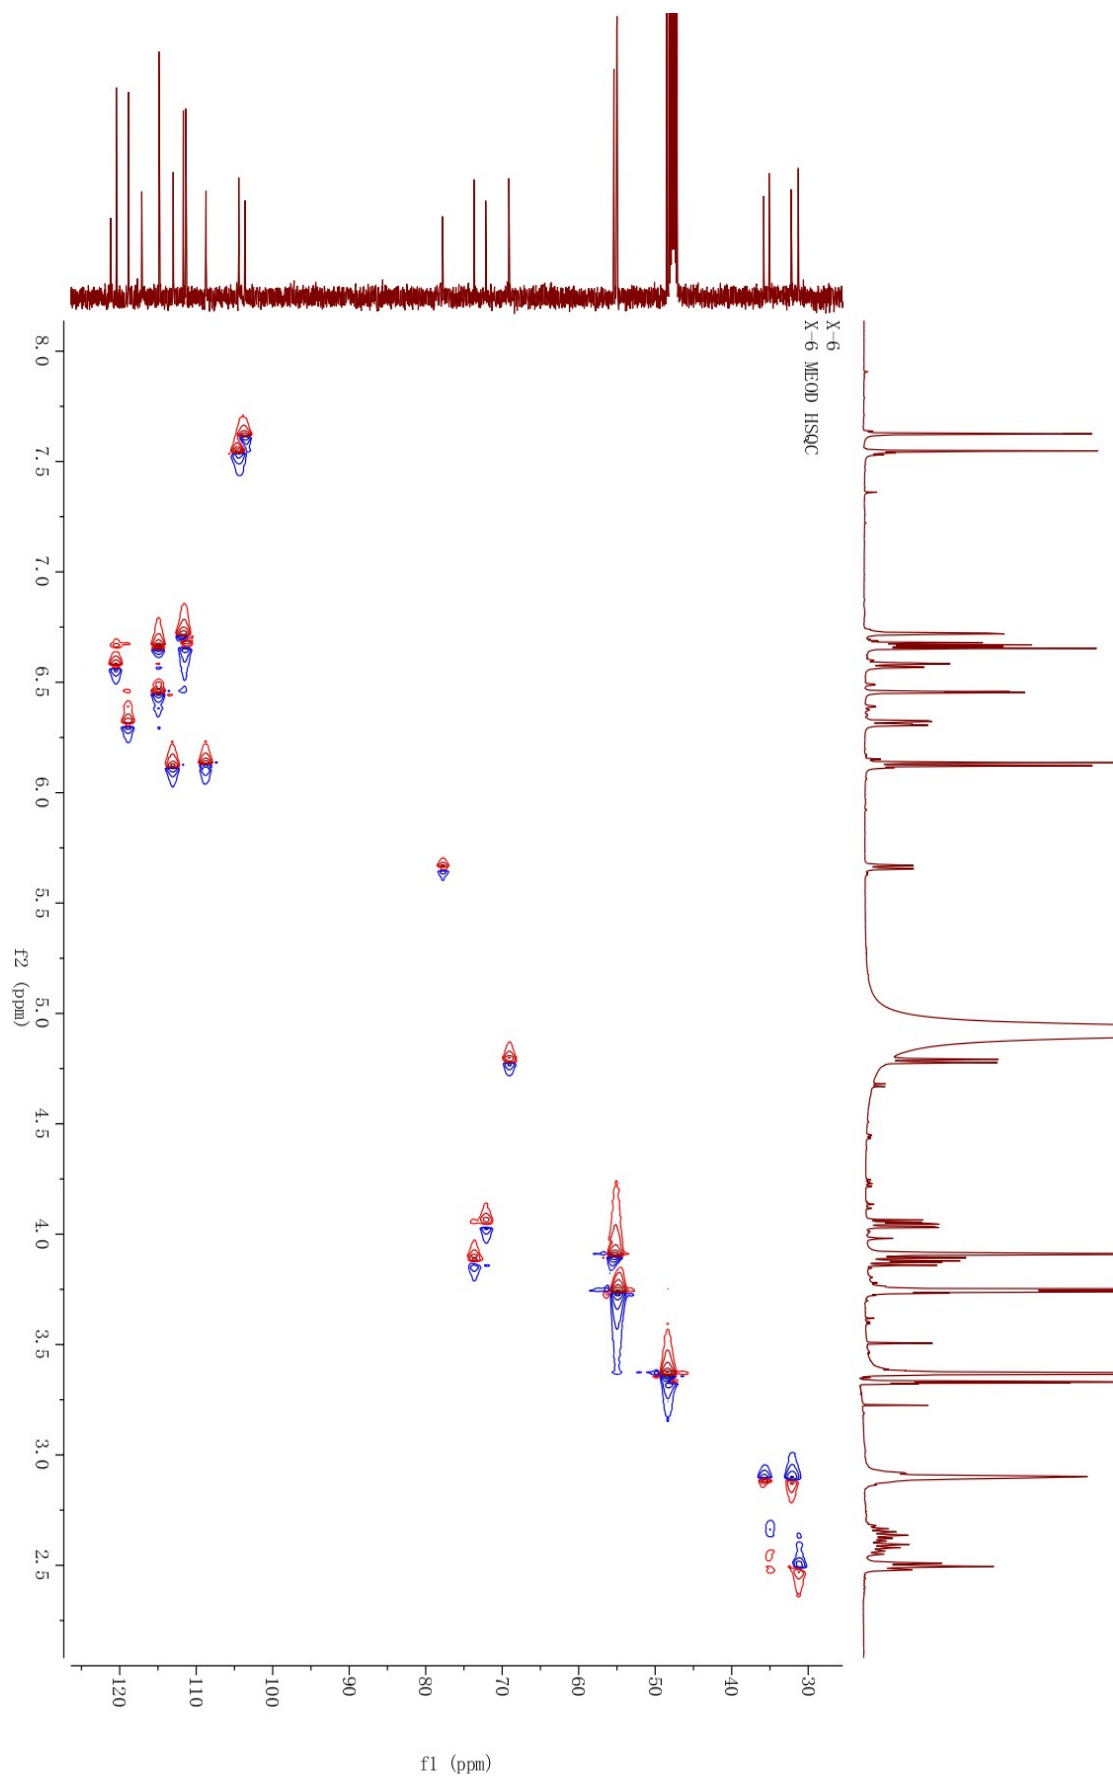

**Figure S44.** HSQC spectrum of compound **6** in CD<sub>3</sub>OD.



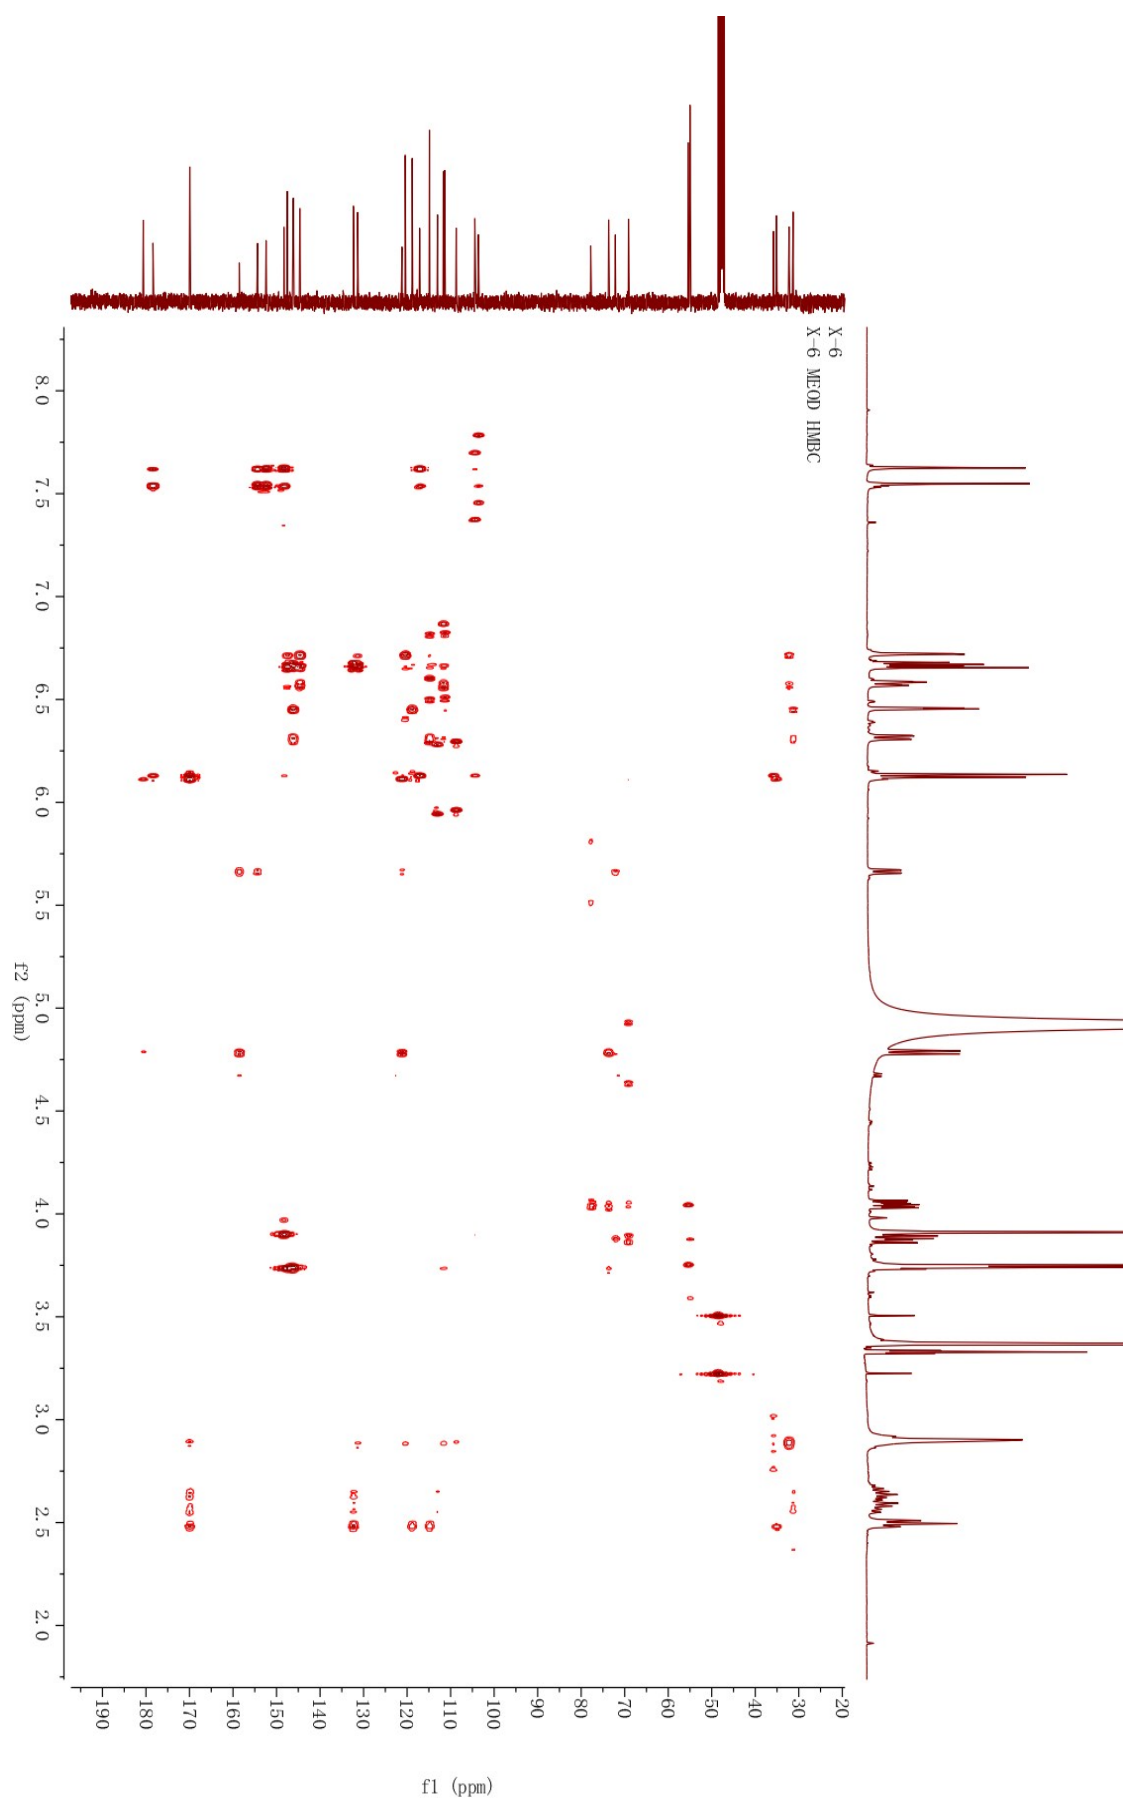

**Figure S45.** HMBC spectrum of compound **6** in CD<sub>3</sub>OD.

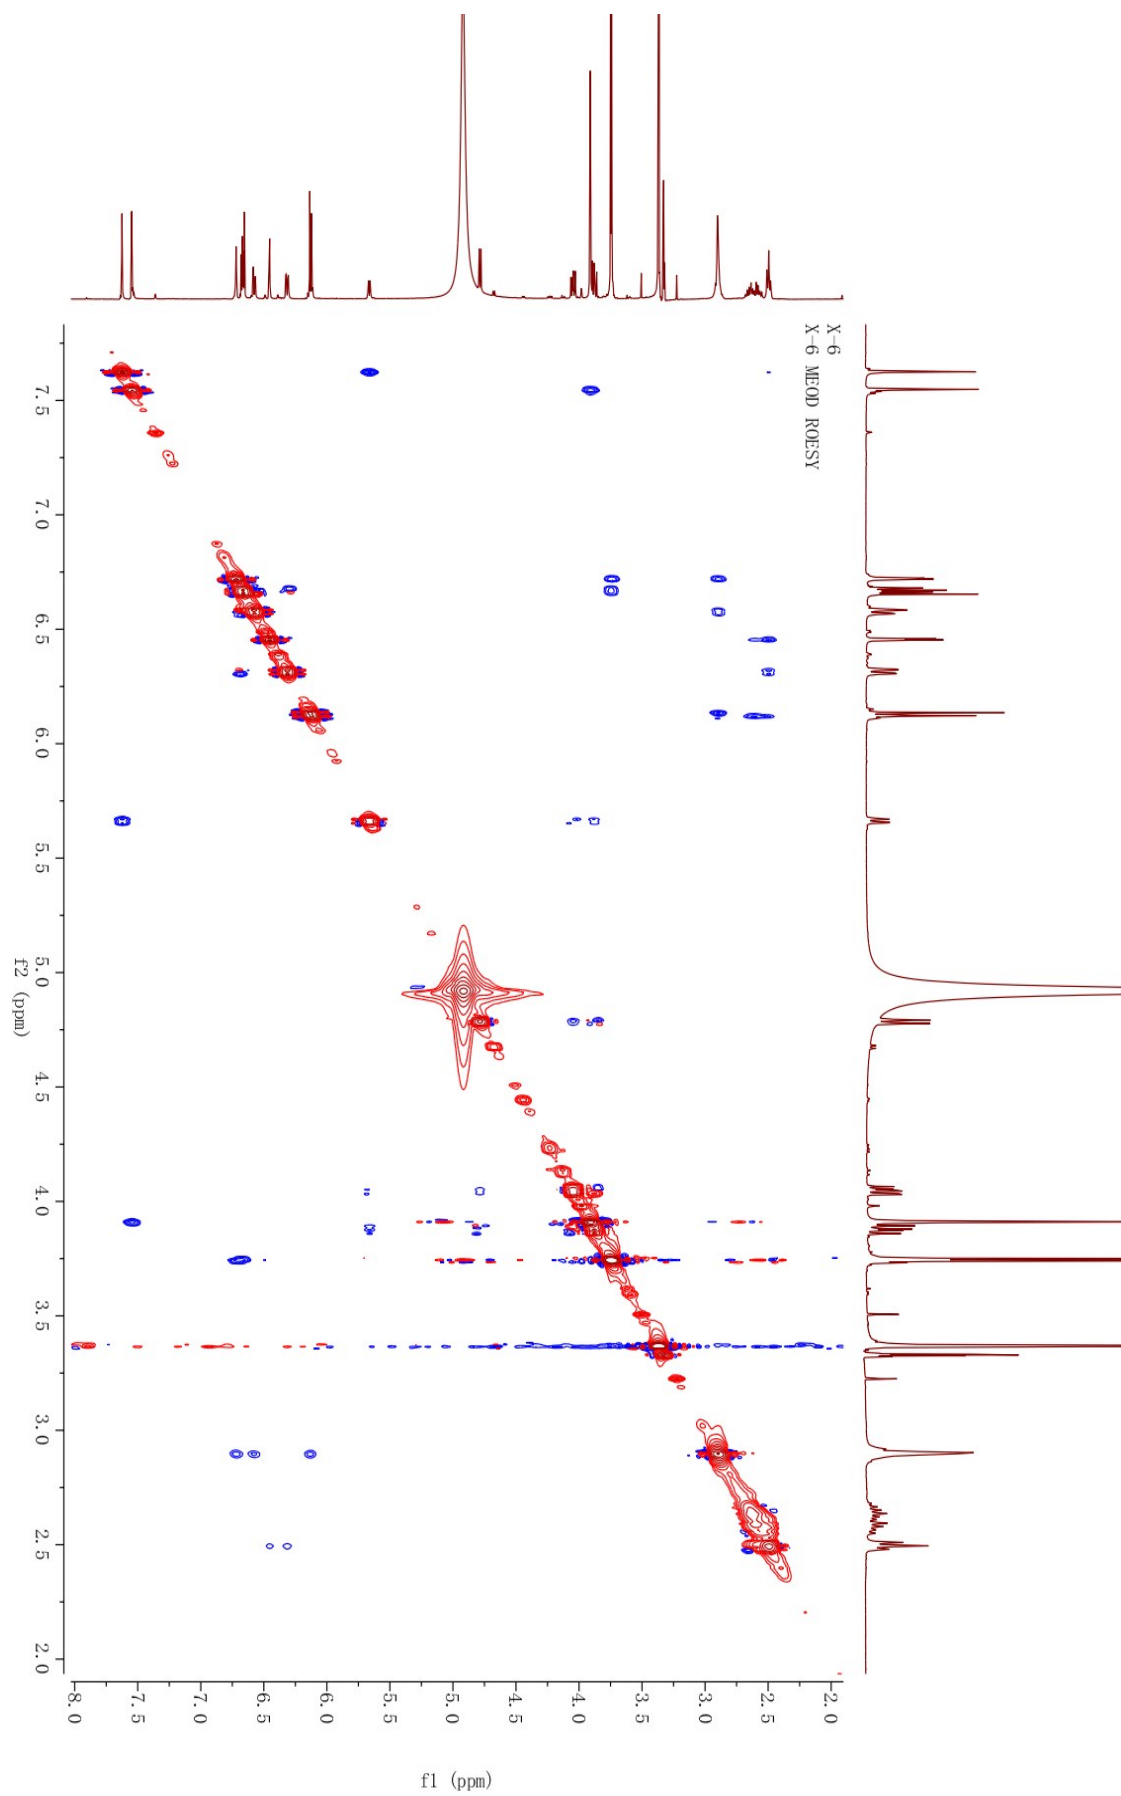

**Figure S46.** ROESY spectrum of compound **6** in CD<sub>3</sub>OD.

## Mass Spectrum SmartFormula Report

| Analysis Info |                                  | Acquisition Date    |                       |
|---------------|----------------------------------|---------------------|-----------------------|
| Analysis Name | D:\Data\A501\Wanghui\X-6.d       | 2017-12-15 18:12:03 |                       |
| Method        | DirectInfusion - MS - positive.m | Operator            | Demo User             |
| Sample Name   | kfd-6-25                         | Instrument          | compact 8255754.20156 |
| Comment       |                                  |                     |                       |

| Acquisition Parameter |            |                      |          |                  |           |
|-----------------------|------------|----------------------|----------|------------------|-----------|
| Source Type           | ESI        | Ion Polarity         | Positive | Set Nebulizer    | 0.4 Bar   |
| Focus                 | Not active | Set Capillary        | 4500 V   | Set Dry Heater   | 180 °C    |
| Scan Begin            | 50 m/z     | Set End Plate Offset | -500 V   | Set Dry Gas      | 4.0 l/min |
| Scan End              | 1300 m/z   | Set Charging Voltage | 2000 V   | Set Divert Valve | Source    |
|                       |            | Set Corona           | 0 nA     | Set APCI Heater  | 0 °C      |

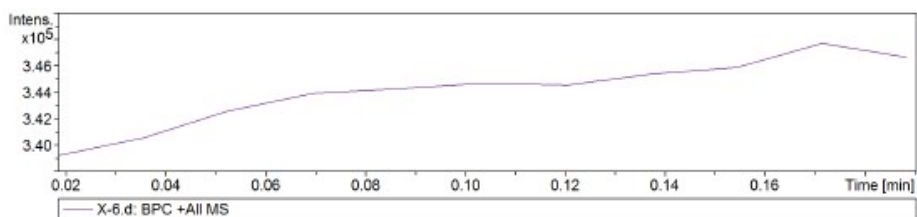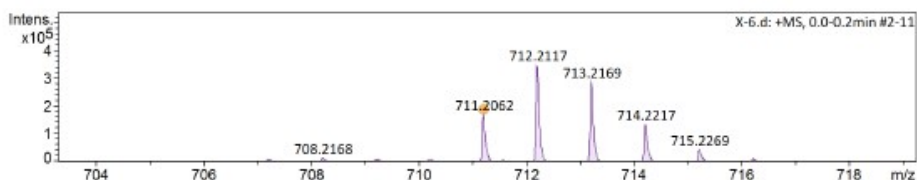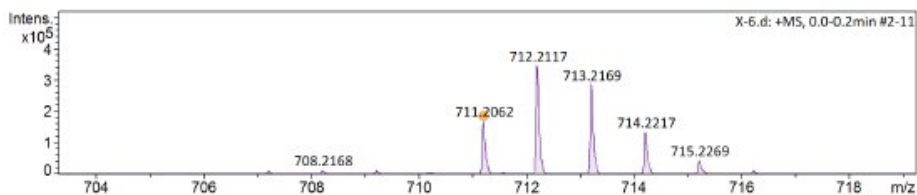

| # | Ion Formula | m/z      | err [mDa] | err [ppm] | mSigma | rdb  | e <sup>-</sup> Conf | N-Rule | Adduct |
|---|-------------|----------|-----------|-----------|--------|------|---------------------|--------|--------|
| 1 | C37H36NaO13 | 711.2048 | -1.3      | -1.9      | 559.8  | 20.0 | even                | ok     | M+Na   |

X-6.d

Bruker Compass DataAnalysis 4.4

printed: 2019-02-14 09:30:22

by: demo

Page 1 of 1

**Figure S47.** HRESIMS spectrum of compound 6.

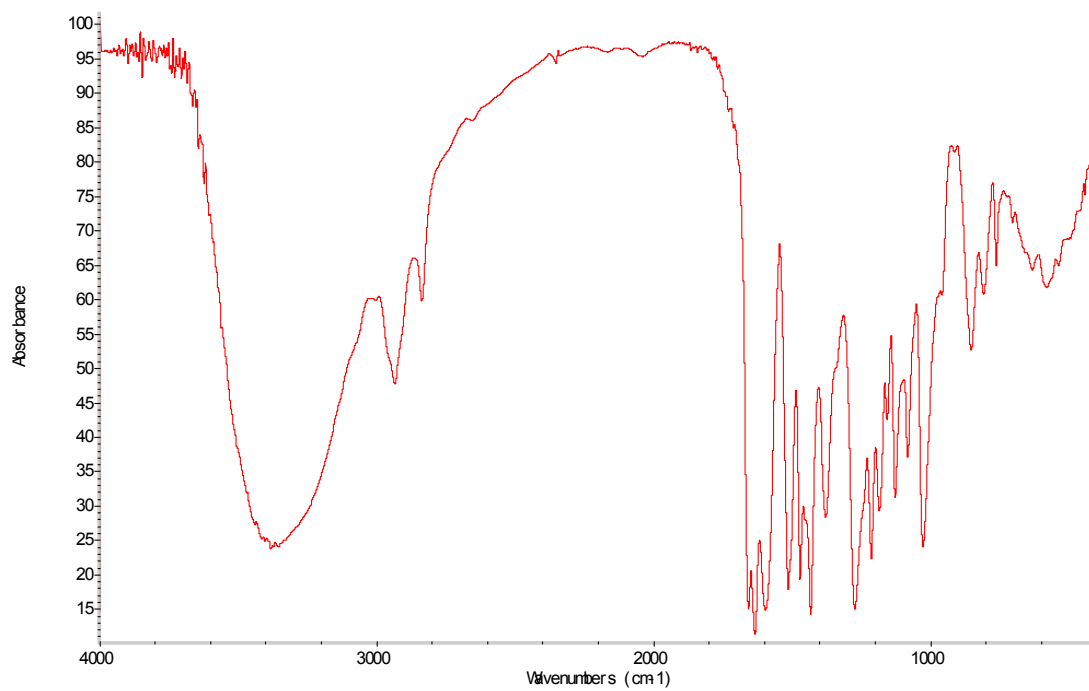

**Figure S48.** IR spectrum of compound 6.

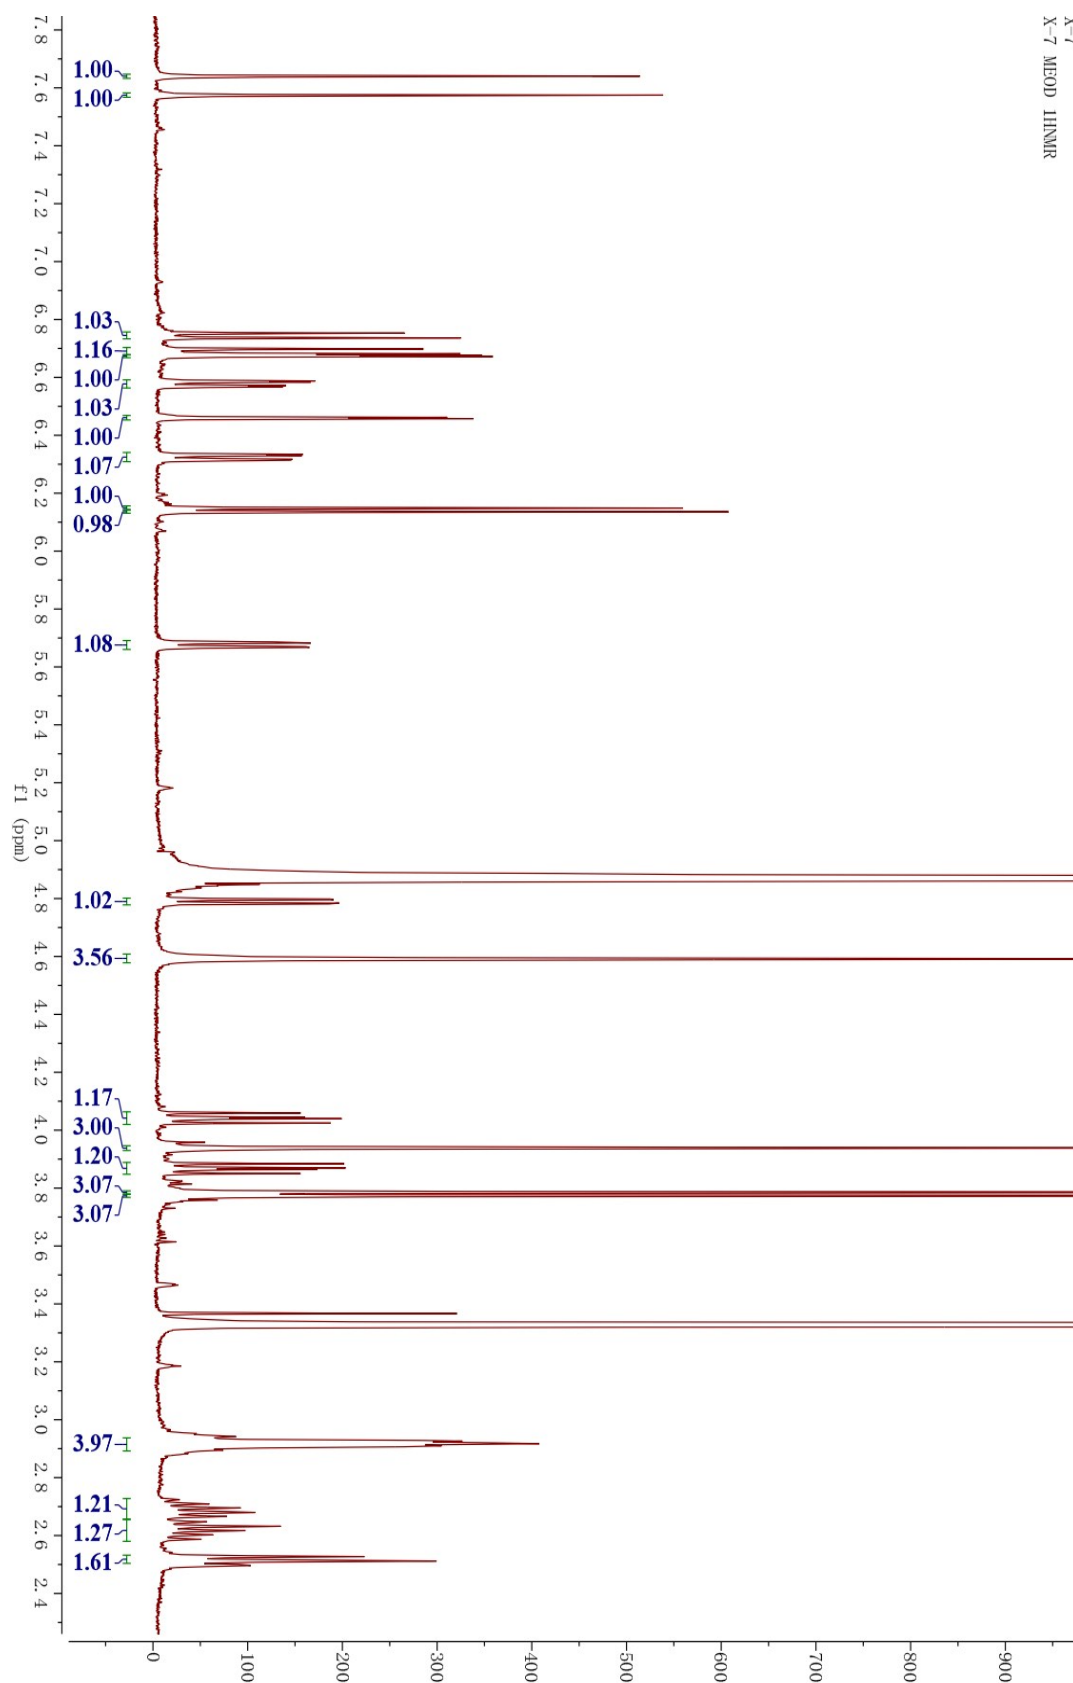

Figure S49. <sup>1</sup>H NMR spectrum (500 MHz) of compound 7 in CD<sub>3</sub>OD.

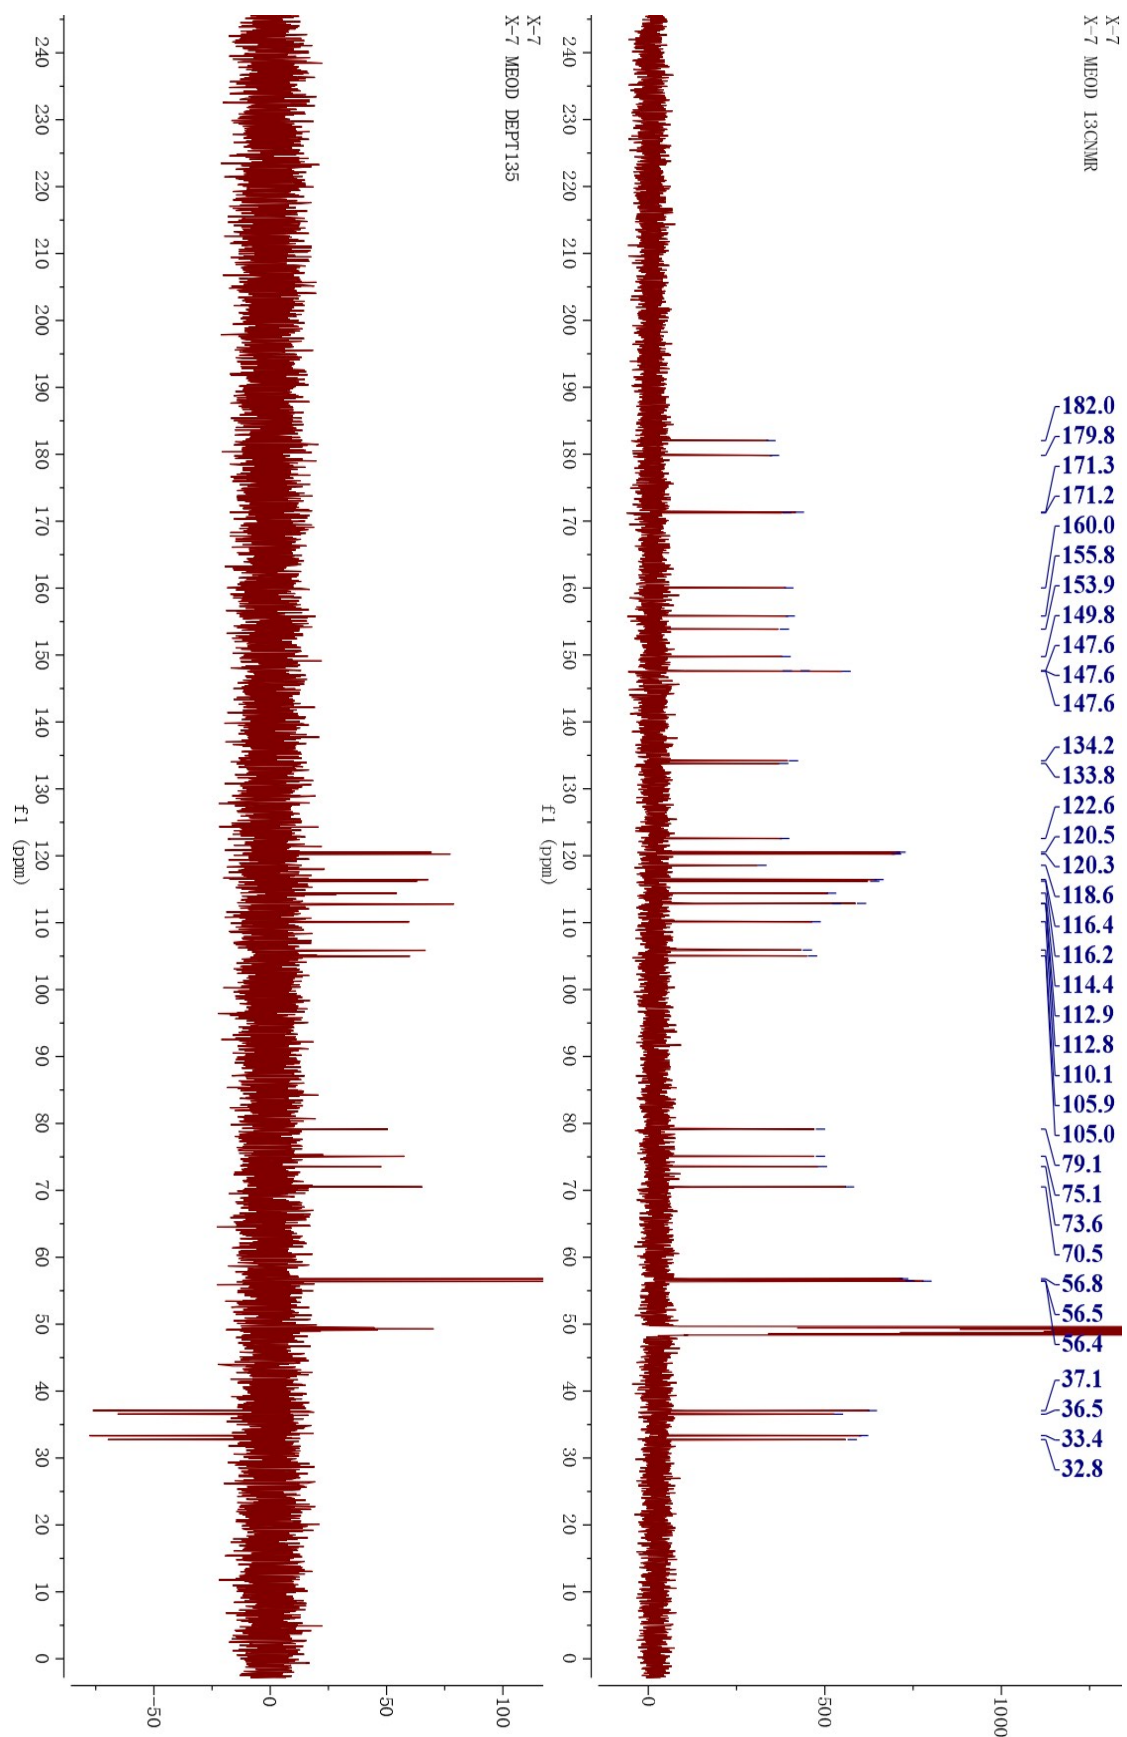

**Figure S50.**  $^{13}\text{C}$  NMR spectrum (125 MHz) of compound **7** in  $\text{CD}_3\text{OD}$ .

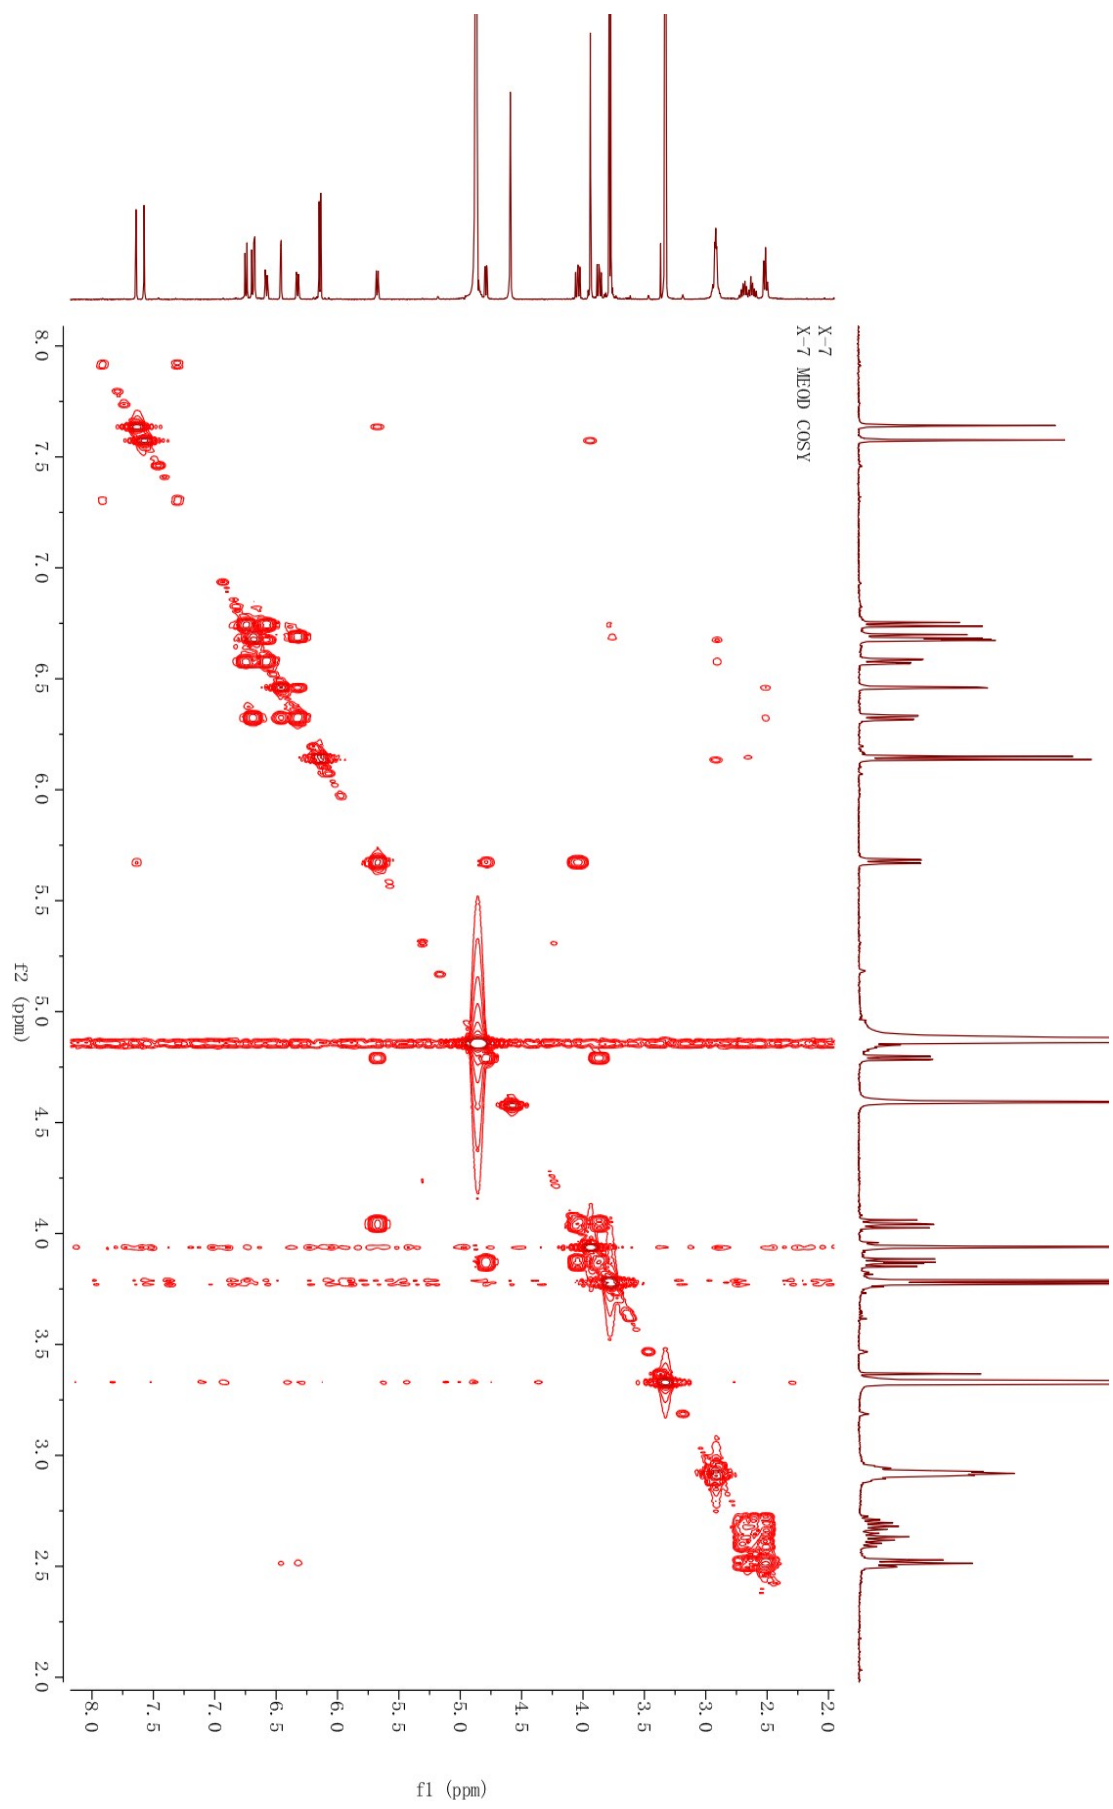

**Figure S51.**  $^1\text{H}$ - $^1\text{H}$  COSY spectrum of compound **7** in  $\text{CD}_3\text{OD}$ .

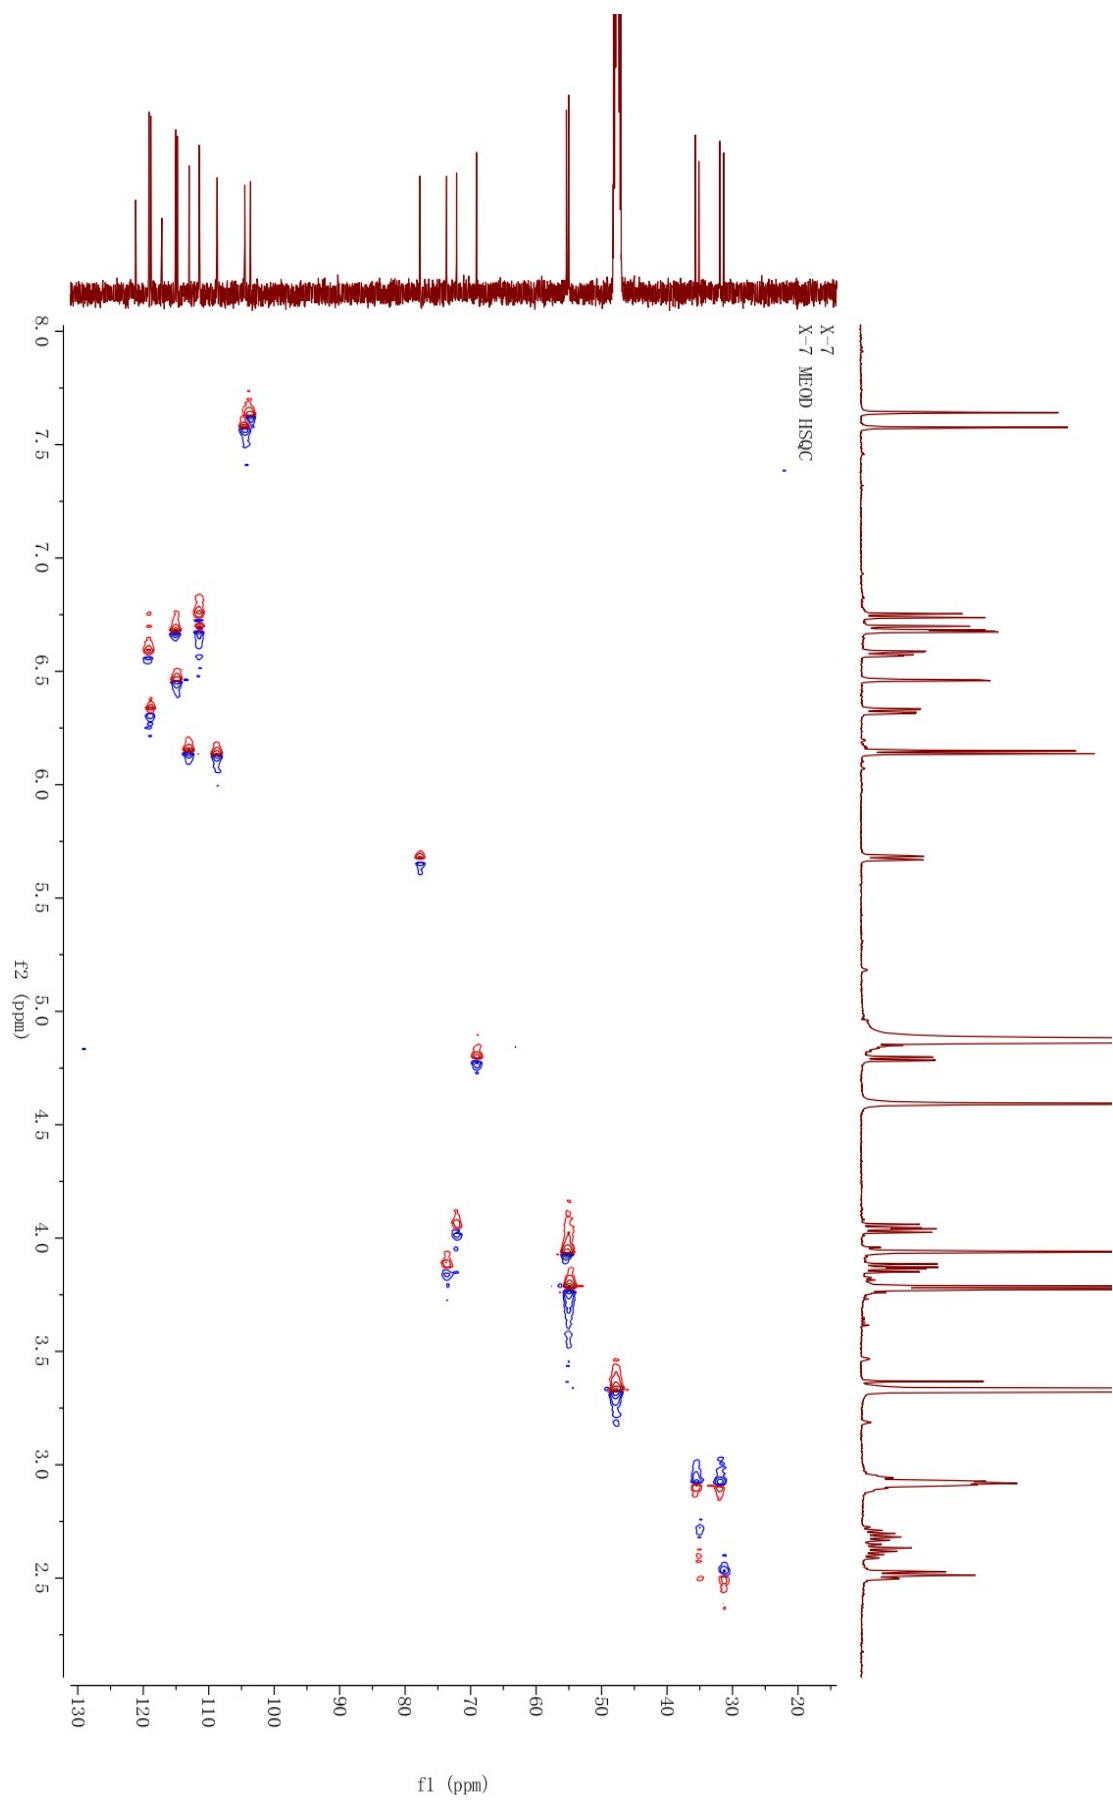

**Figure S52.** HSQC spectrum of compound **7** in  $\text{CD}_3\text{OD}$ .



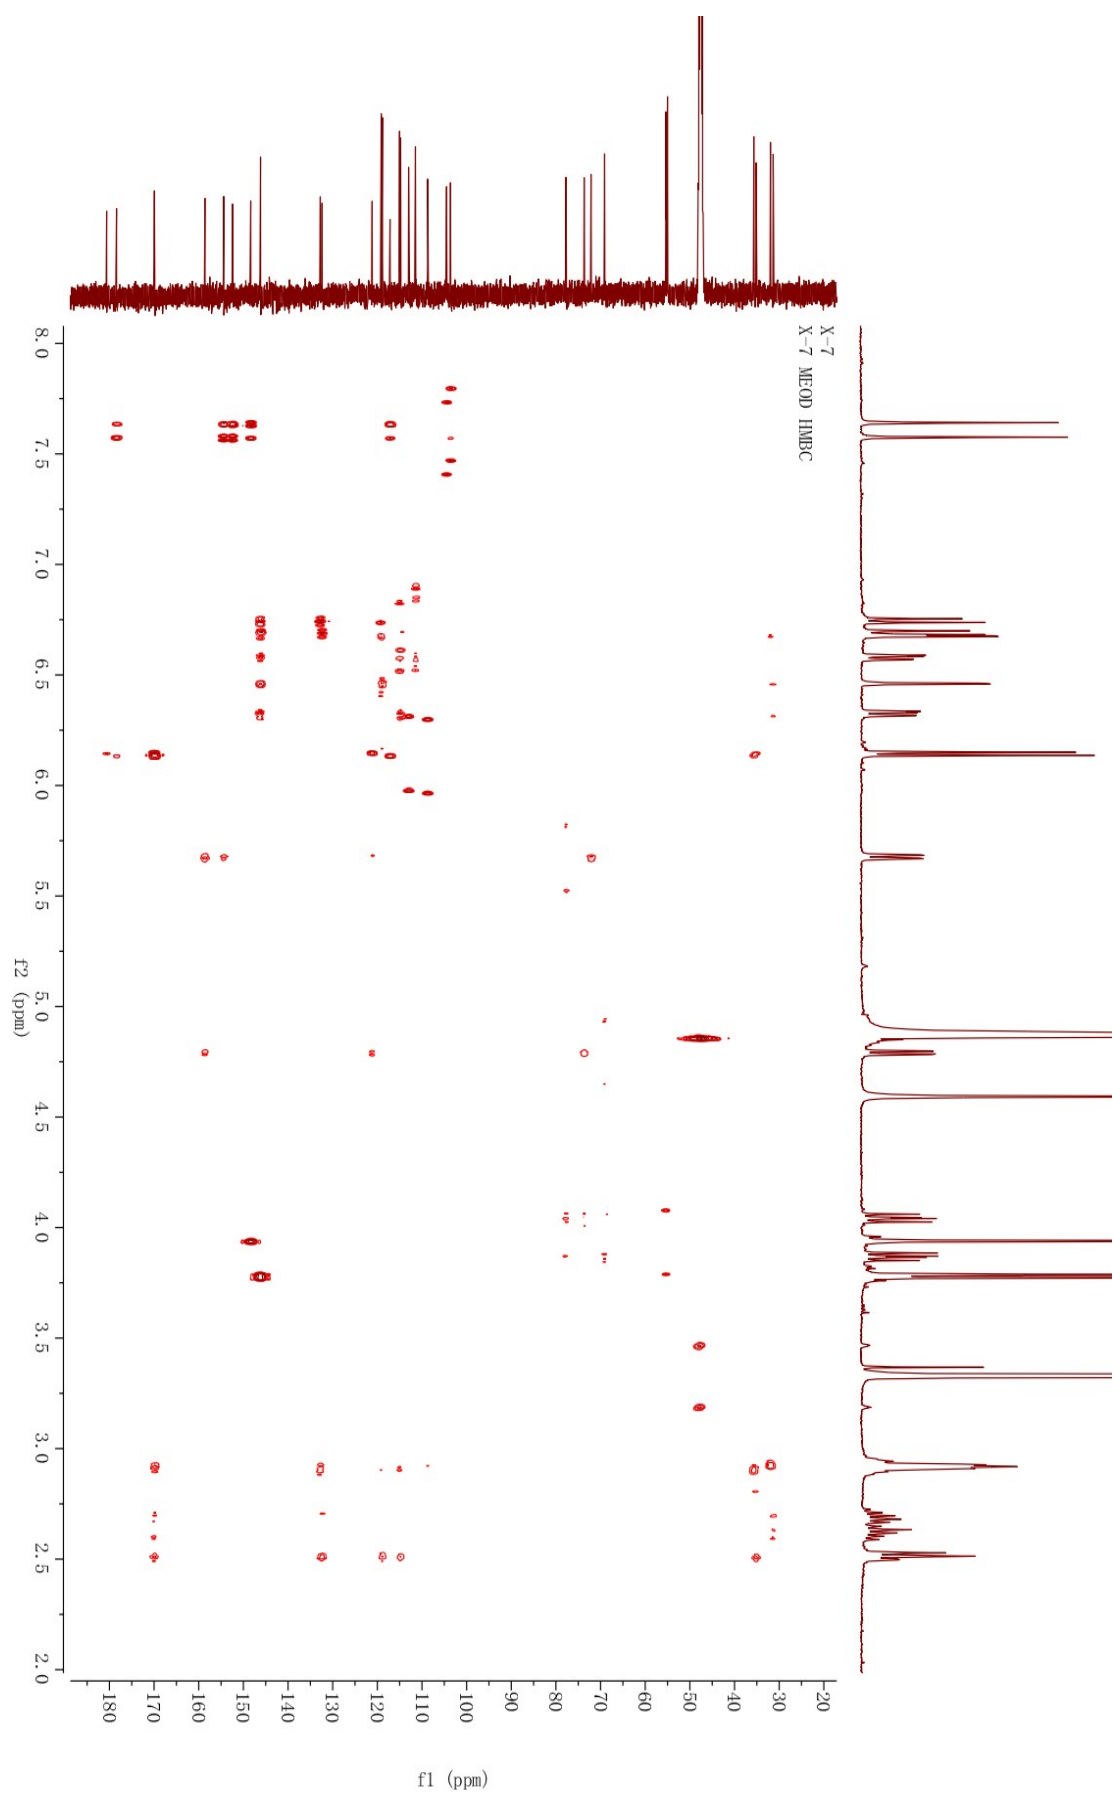

**Figure S53.** HMBC spectrum of compound **7** in CD<sub>3</sub>OD.

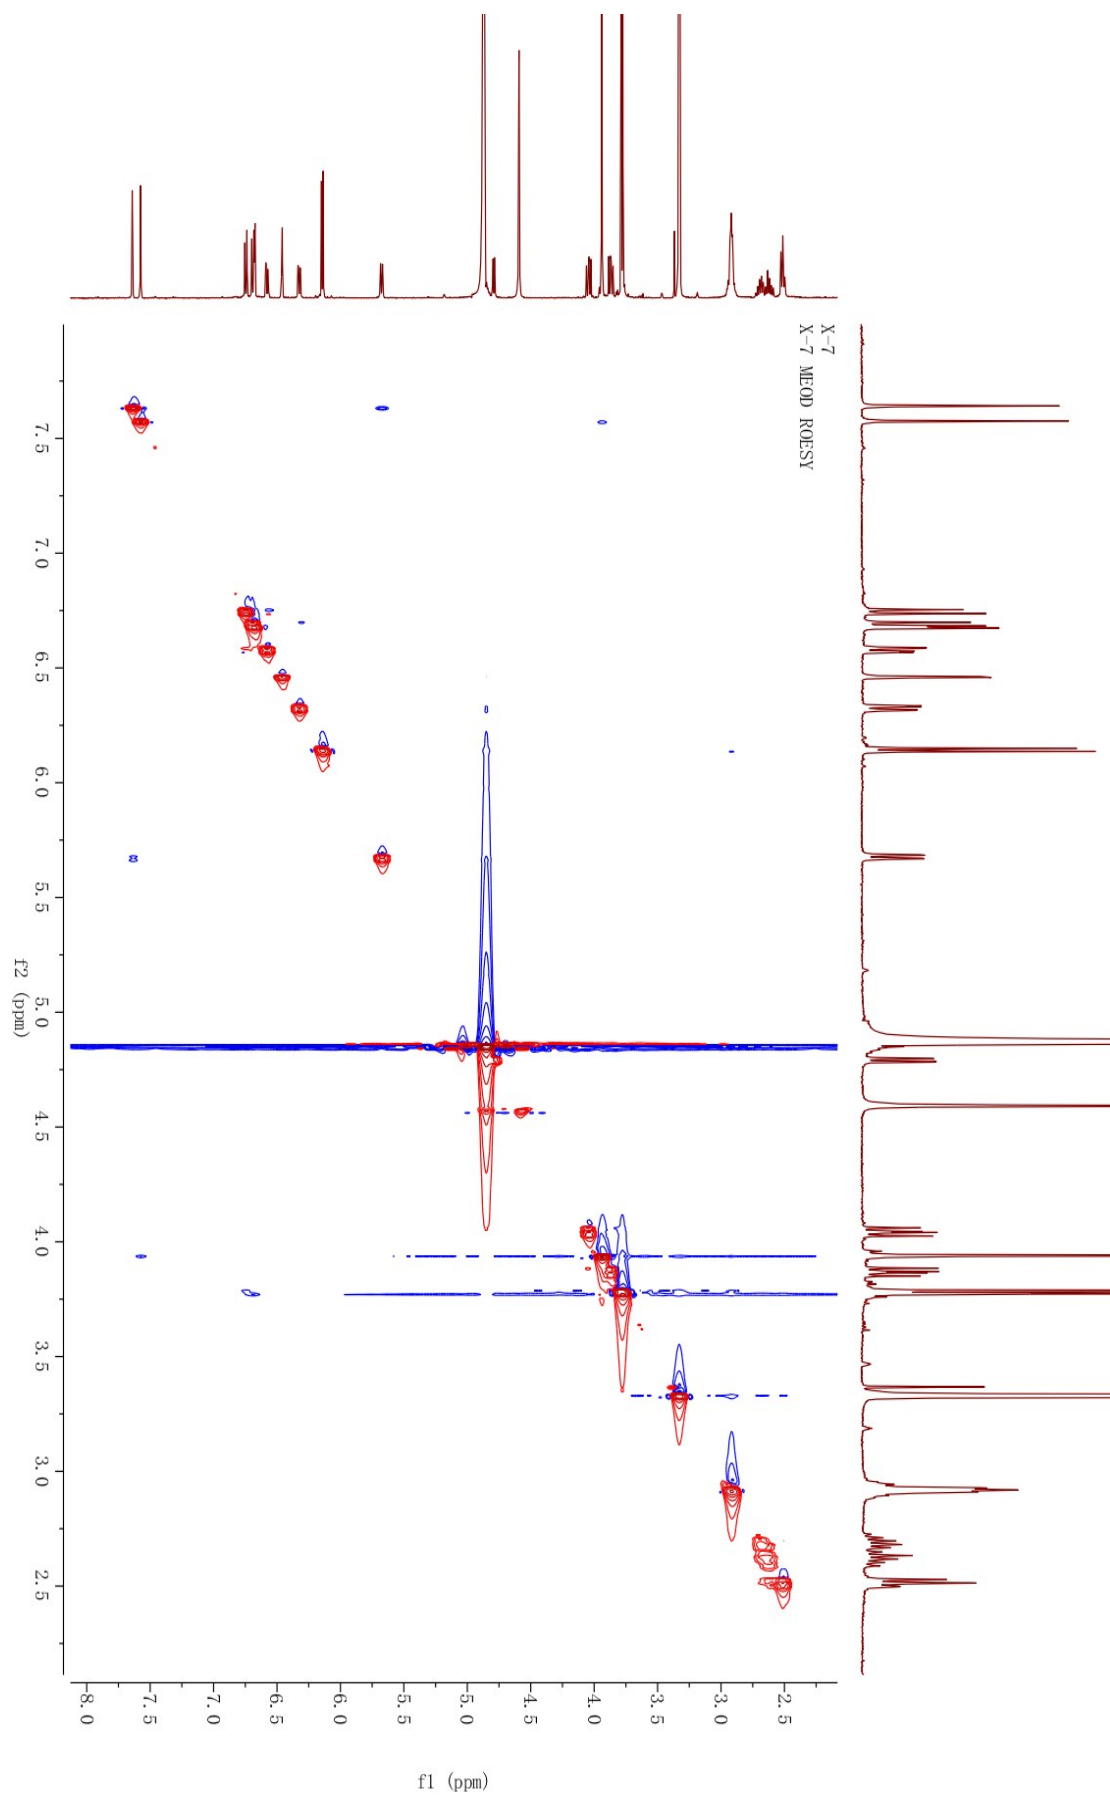

**Figure S54.** ROESY spectrum of compound **7** in CD<sub>3</sub>OD.

## Mass Spectrum SmartFormula Report

| Analysis Info         |                                  | Acquisition Date 2017-12-15 17:52:55 |           |                  |           |
|-----------------------|----------------------------------|--------------------------------------|-----------|------------------|-----------|
| Analysis Name         | D:\Data\A501\Wanghui\X-7B.d      | Operator                             | Demo User |                  |           |
| Method                | DirectInfusion - MS - positive.m | Instrument                           | compact   | 8255754.20158    |           |
| Sample Name           | kfd-8-25                         | Comment                              |           |                  |           |
| Acquisition Parameter |                                  |                                      |           |                  |           |
| Source Type           | ESI                              | Ion Polarity                         | Positive  | Set Nebulizer    | 0.4 Bar   |
| Focus                 | Not active                       | Set Capillary                        | 4500 V    | Set Dry Heater   | 180 °C    |
| Scan Begin            | 50 m/z                           | Set End Plate Offset                 | -500 V    | Set Dry Gas      | 4.0 l/min |
| Scan End              | 1300 m/z                         | Set Charging Voltage                 | 2000 V    | Set Divert Valve | Source    |
|                       |                                  | Set Corona                           | 0 nA      | Set APCI Heater  | 0 °C      |

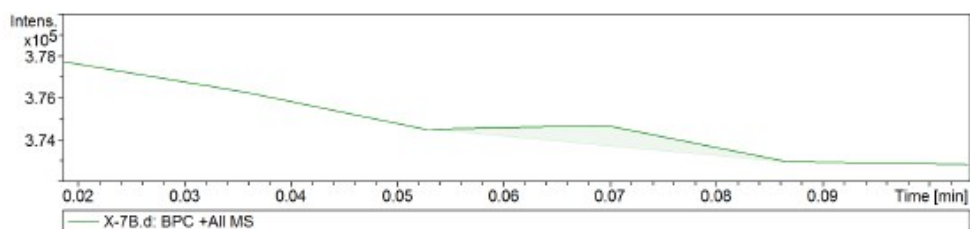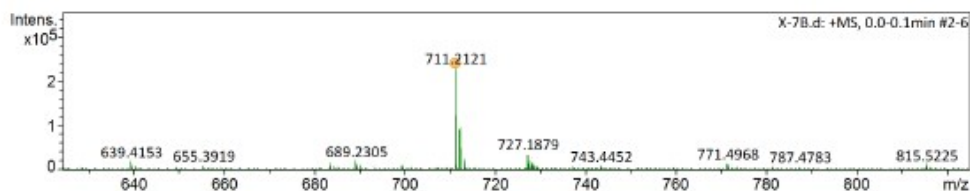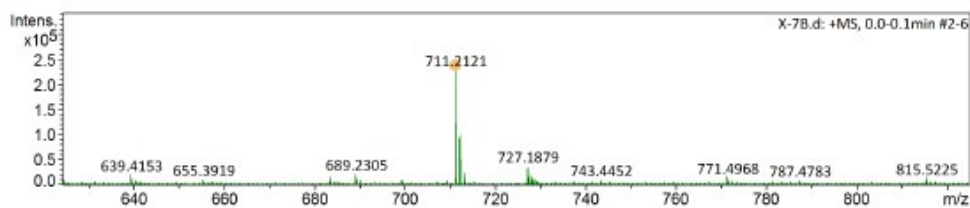

| # | Ion Formula | m/z      | err [mDa] | err [ppm] | mSigma | rdb  | e <sup>-</sup> Conf | N-Rule | Adduct |
|---|-------------|----------|-----------|-----------|--------|------|---------------------|--------|--------|
| 1 | C37H36NaO13 | 711.2048 | -7.3      | -10.3     | 3.0    | 20.0 | even                | ok     | M+Na   |

X-7B.d

Bruker Compass DataAnalysis 4.4

printed: 2019-02-14 09:32:13

by: demo

Page 1 of 1

**Figure S55.** HRESIMS spectrum of compound 7.

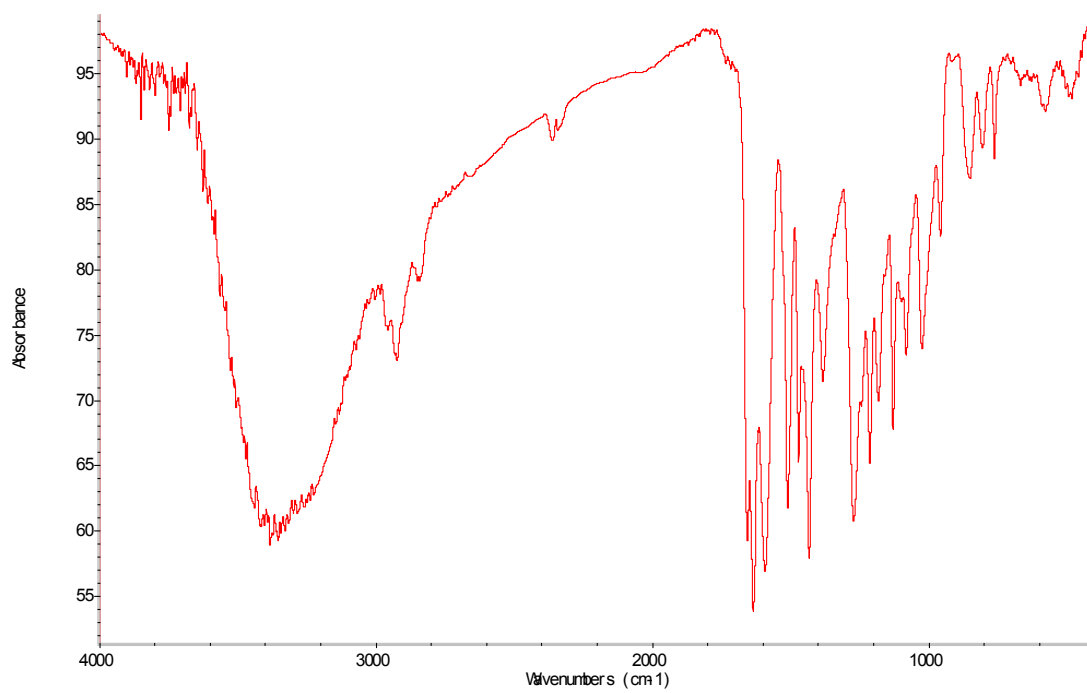

**Figure S56.** IR spectrum of compound 7.

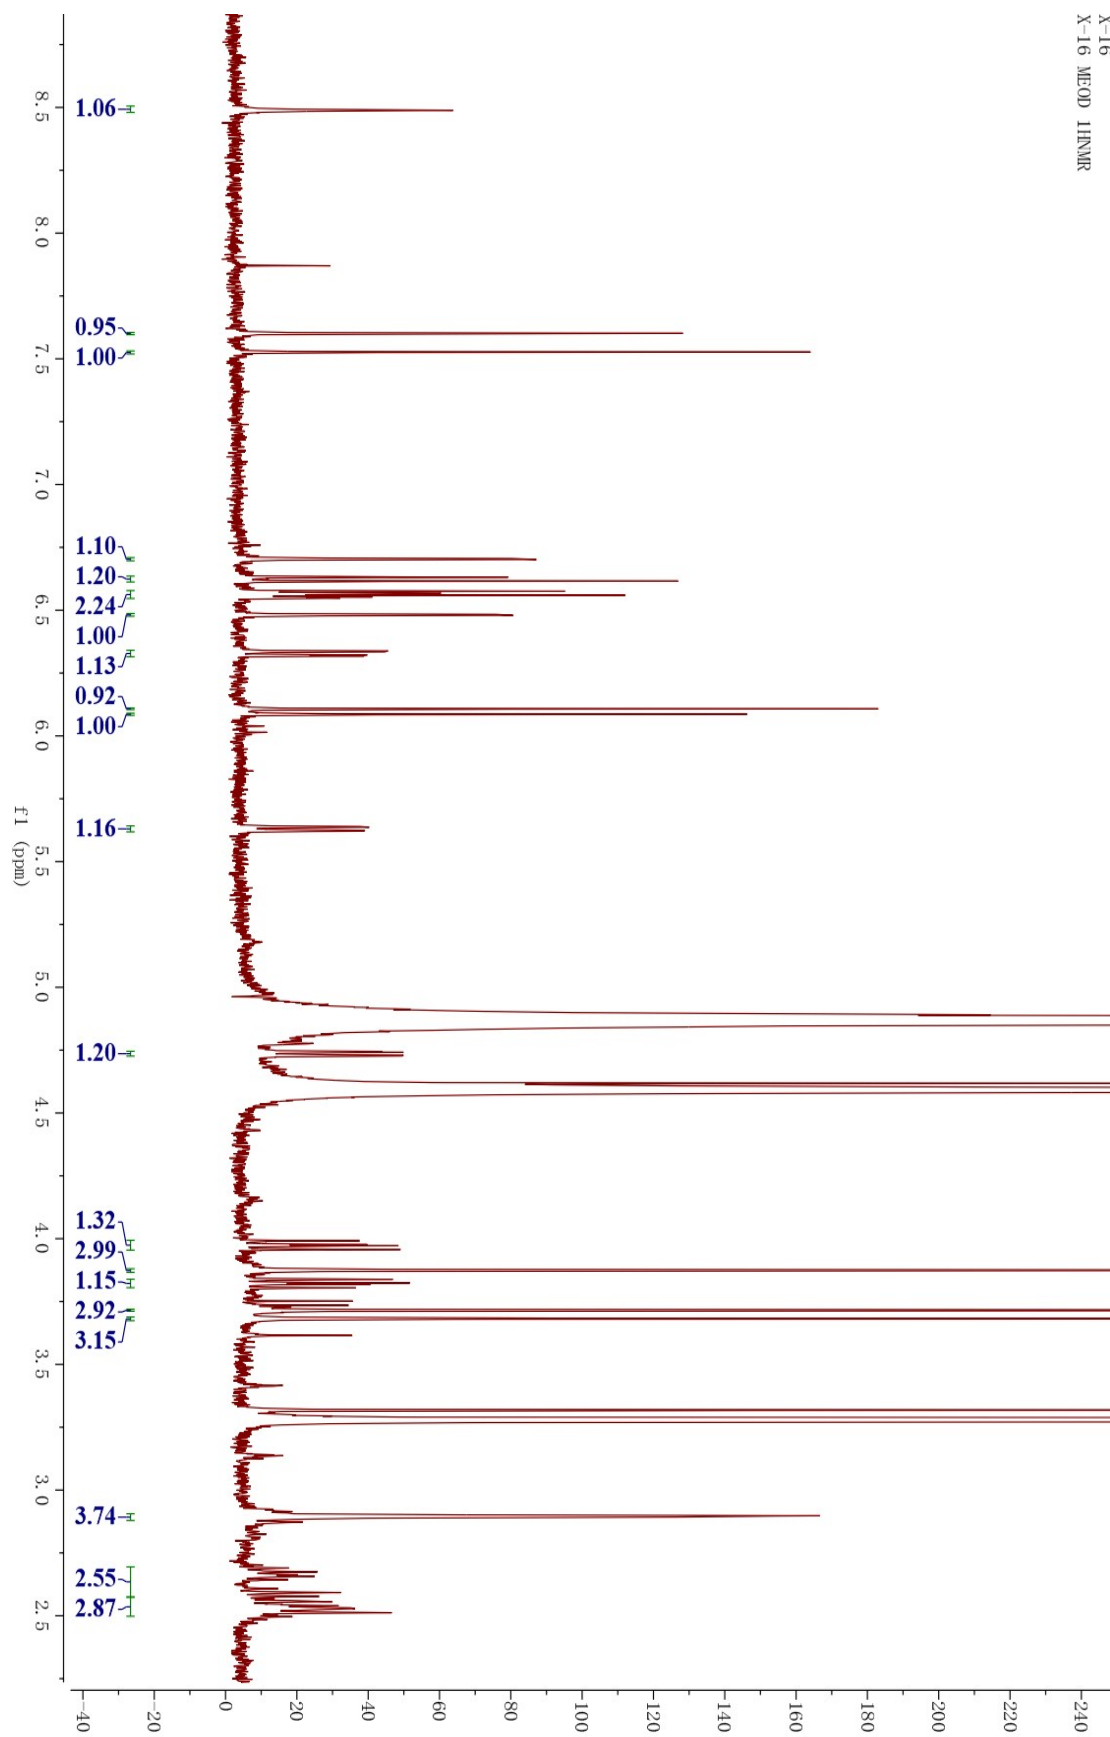

**Figure S57.** <sup>1</sup>H NMR spectrum (600 MHz) of compound **8** in CD<sub>3</sub>OD.

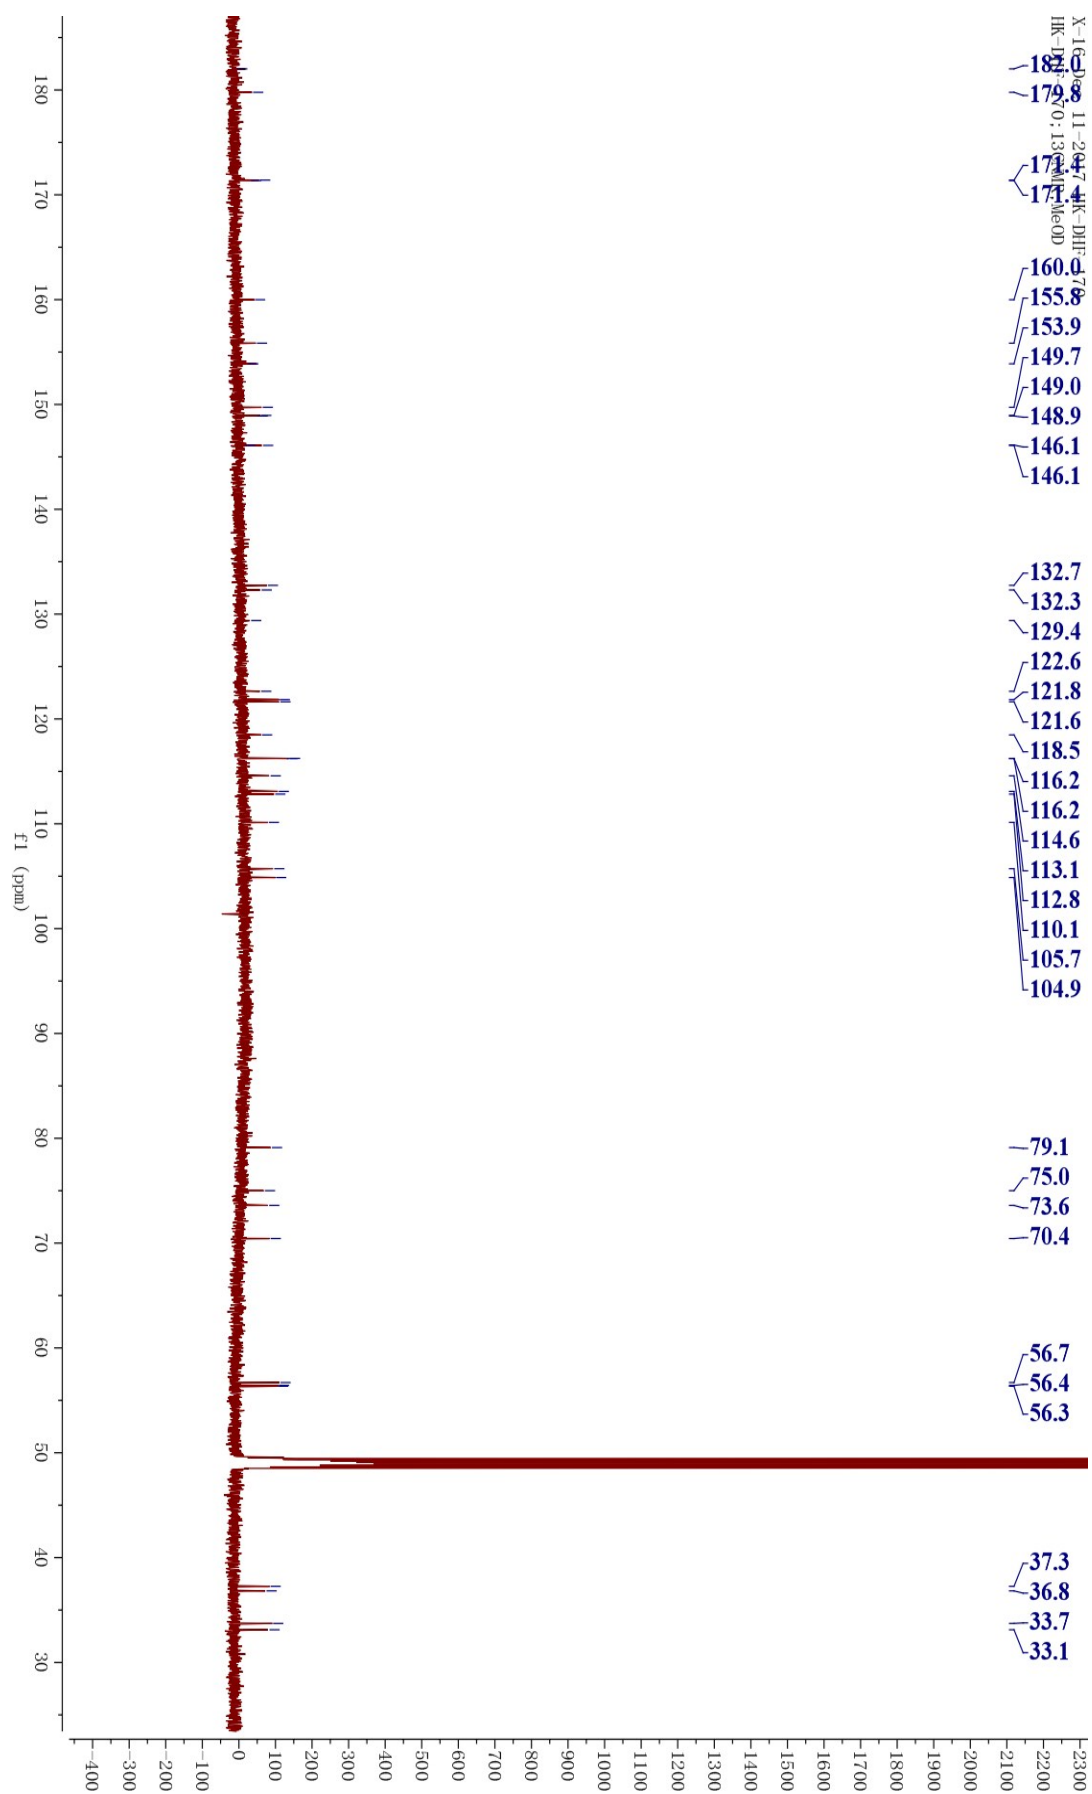

Figure S58.  $^{13}\text{C}$  NMR spectrum (150 MHz) of compound **8** in  $\text{CD}_3\text{OD}$ .

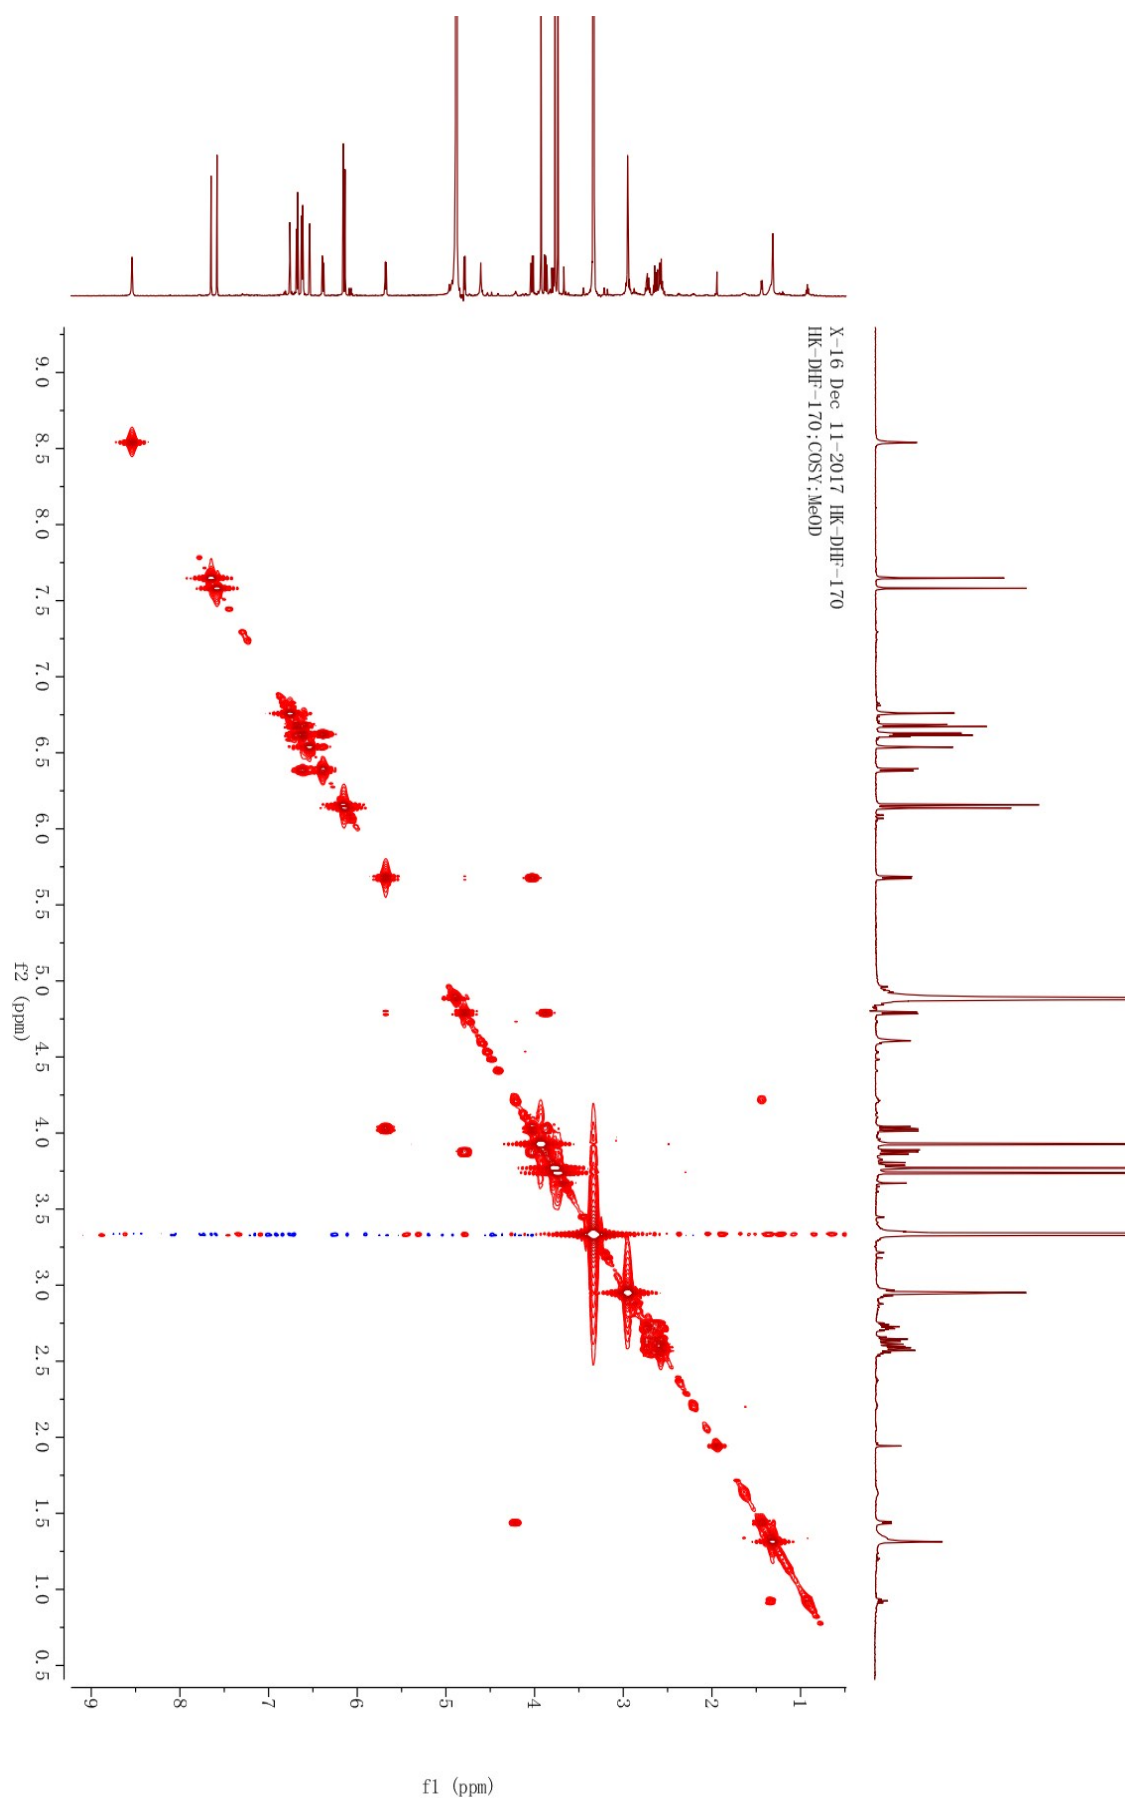

**Figure S59.**  $^1\text{H}$ - $^1\text{H}$  COSY spectrum of compound **8** in  $\text{CD}_3\text{OD}$ .

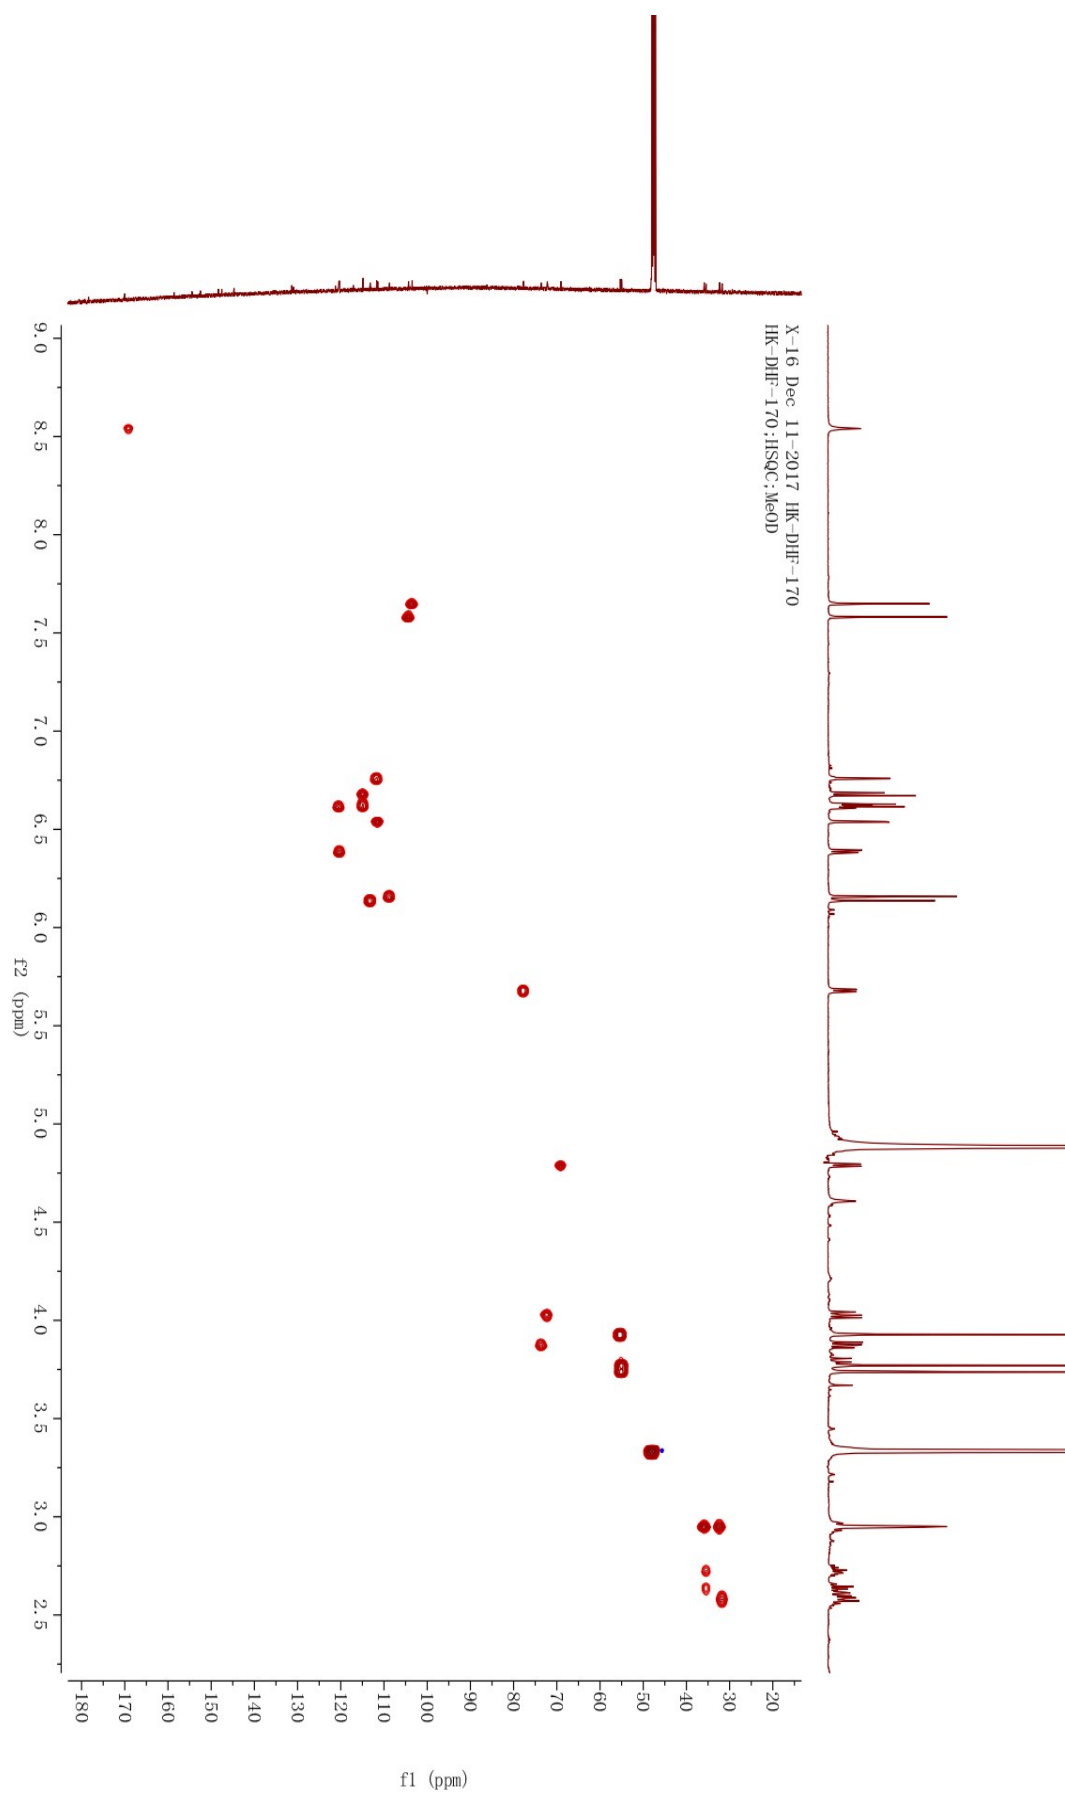

**Figure S60.** HSQC spectrum of compound **8** in  $\text{CD}_3\text{OD}$ .



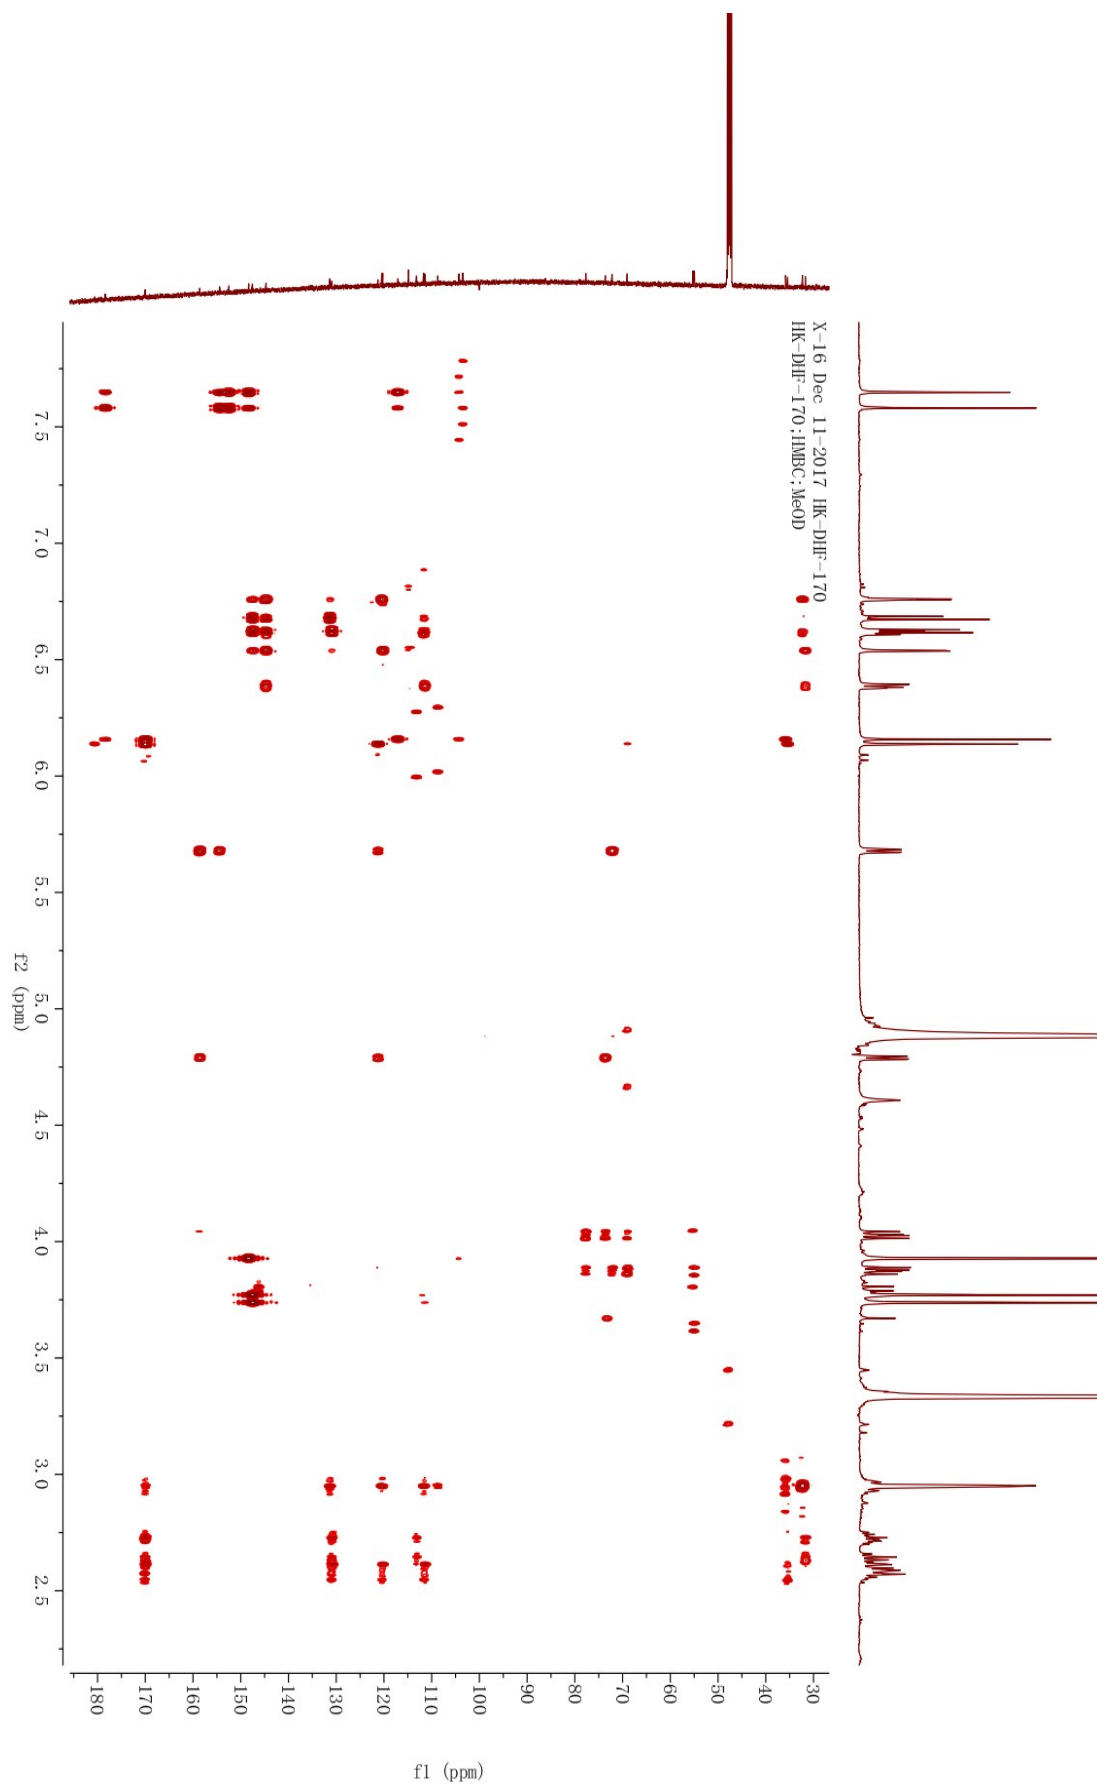

**Figure S61.** HMBC spectrum of compound **8** in CD<sub>3</sub>OD.

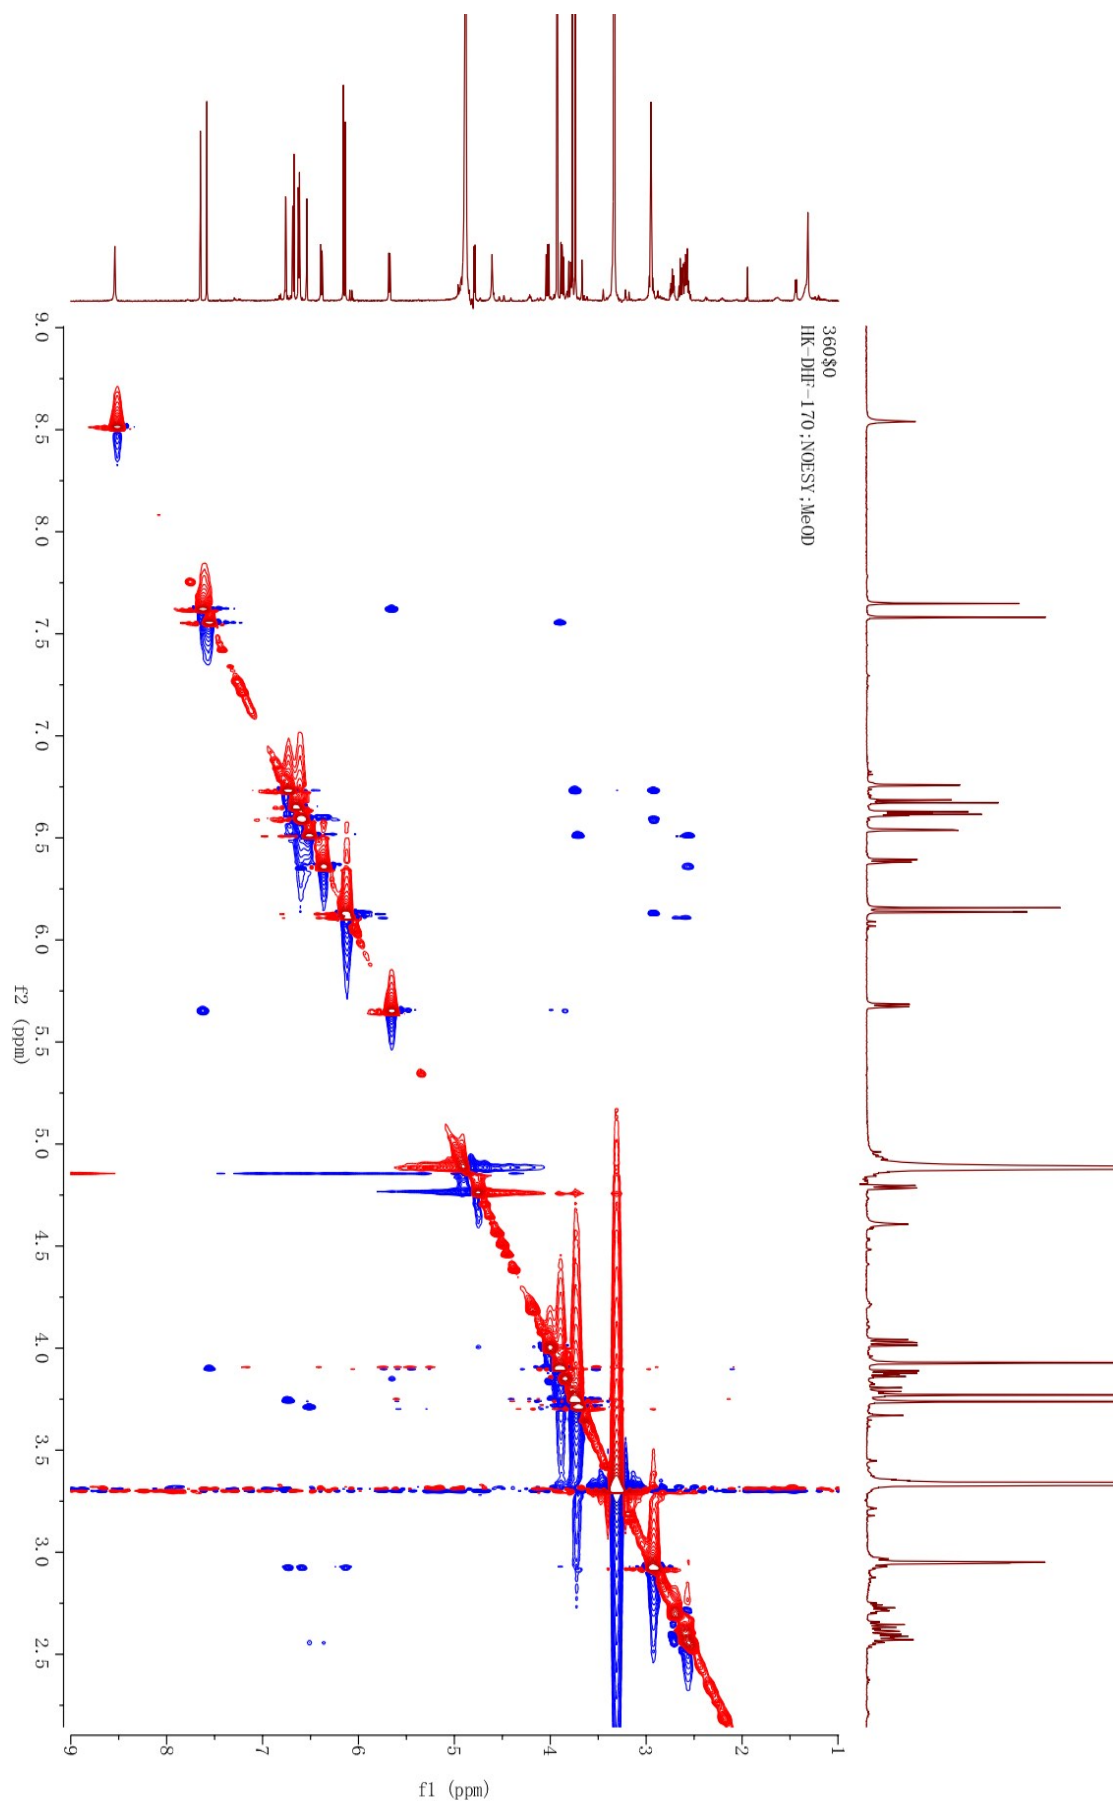

**Figure S62.** NOESY spectrum of compound **8** in CD<sub>3</sub>OD.

## Mass Spectrum SmartFormula Report

|                      |                                    |                  |                     |               |
|----------------------|------------------------------------|------------------|---------------------|---------------|
| <b>Analysis Info</b> |                                    | Acquisition Date | 2018-05-07 16:53:28 |               |
| Analysis Name        | D:\Data\A5011\YZ\2018.05.07\X-16.d | Operator         | Demo User           |               |
| Method               | DirectInfusion - MS - positive.m   | Instrument       | compact             | 8255754.20158 |
| Sample Name          | X-16                               | Comment          |                     |               |

|                              |            |                      |          |                  |           |
|------------------------------|------------|----------------------|----------|------------------|-----------|
| <b>Acquisition Parameter</b> |            |                      |          |                  |           |
| Source Type                  | ESI        | Ion Polarity         | Positive | Set Nebulizer    | 0.4 Bar   |
| Focus                        | Not active | Set Capillary        | 4500 V   | Set Dry Heater   | 180 °C    |
| Scan Begin                   | 50 m/z     | Set End Plate Offset | -500 V   | Set Dry Gas      | 4.0 l/min |
| Scan End                     | 1300 m/z   | Set Charging Voltage | 2000 V   | Set Divert Valve | Source    |
|                              |            | Set Corona           | 0 nA     | Set APCI Heater  | 0 °C      |

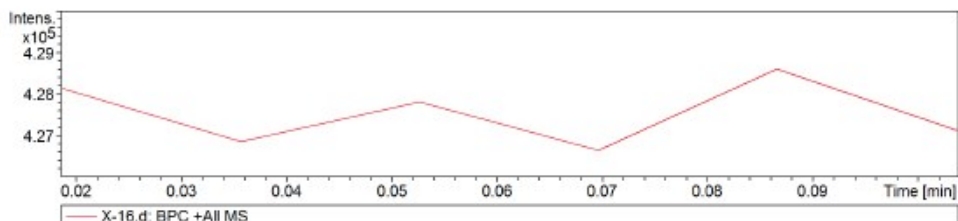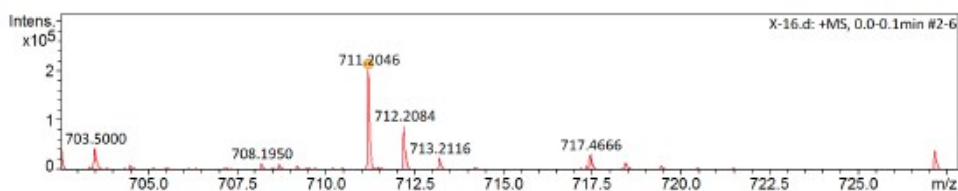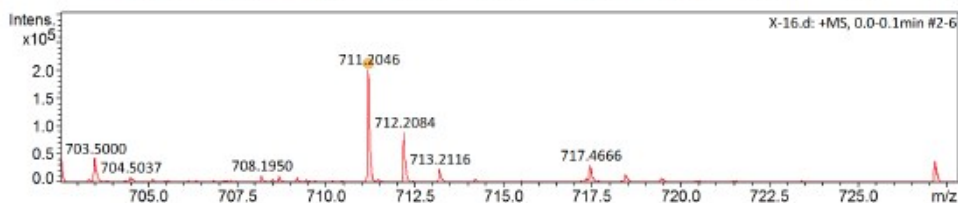

| Meas. m/z | # | Ion Formula                                       | m/z      | err [ppm] | mSigma | # mSigma | Score  | rdb  | e <sup>-</sup> Conf | N-Rule | Adduct |
|-----------|---|---------------------------------------------------|----------|-----------|--------|----------|--------|------|---------------------|--------|--------|
| 711.2046  | 1 | C <sub>37</sub> H <sub>36</sub> NaO <sub>13</sub> | 711.2048 | 0.3       | 14.2   | 1        | 100.00 | 20.0 | even                | ok     | M+Na   |

X-16.d

Bruker Compass DataAnalysis 4.4

printed: 2019-02-14 09:33:28

by: demo

Page 1 of 1

**Figure S63.** HRESIMS spectrum of compound **8**.

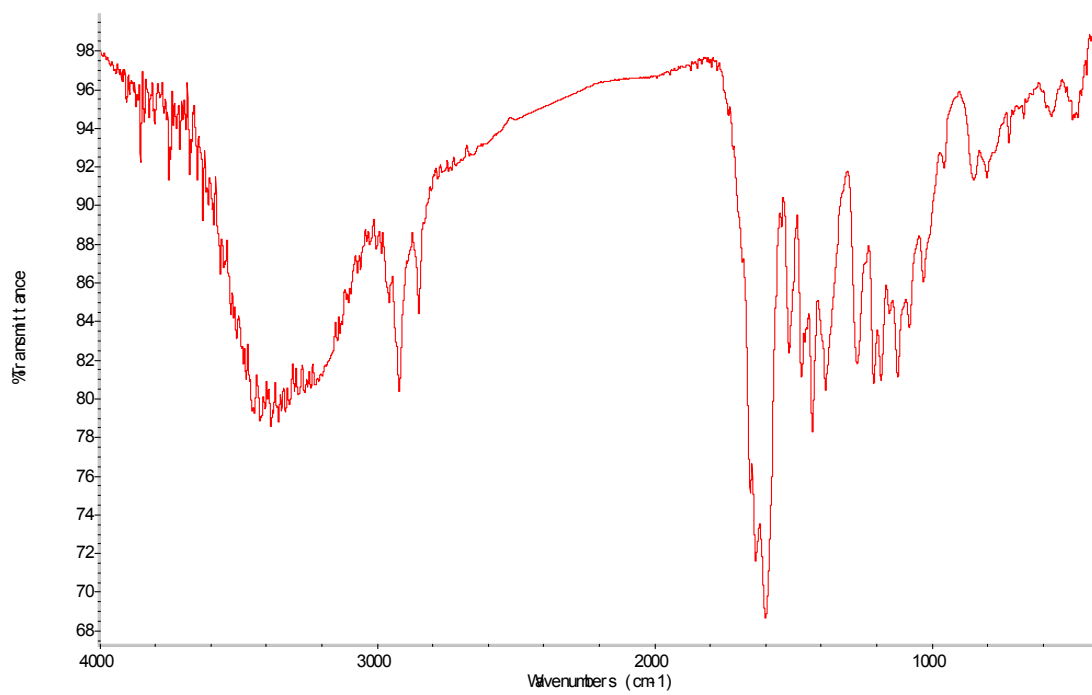

**Figure S64.** IR spectrum of compound **8**.

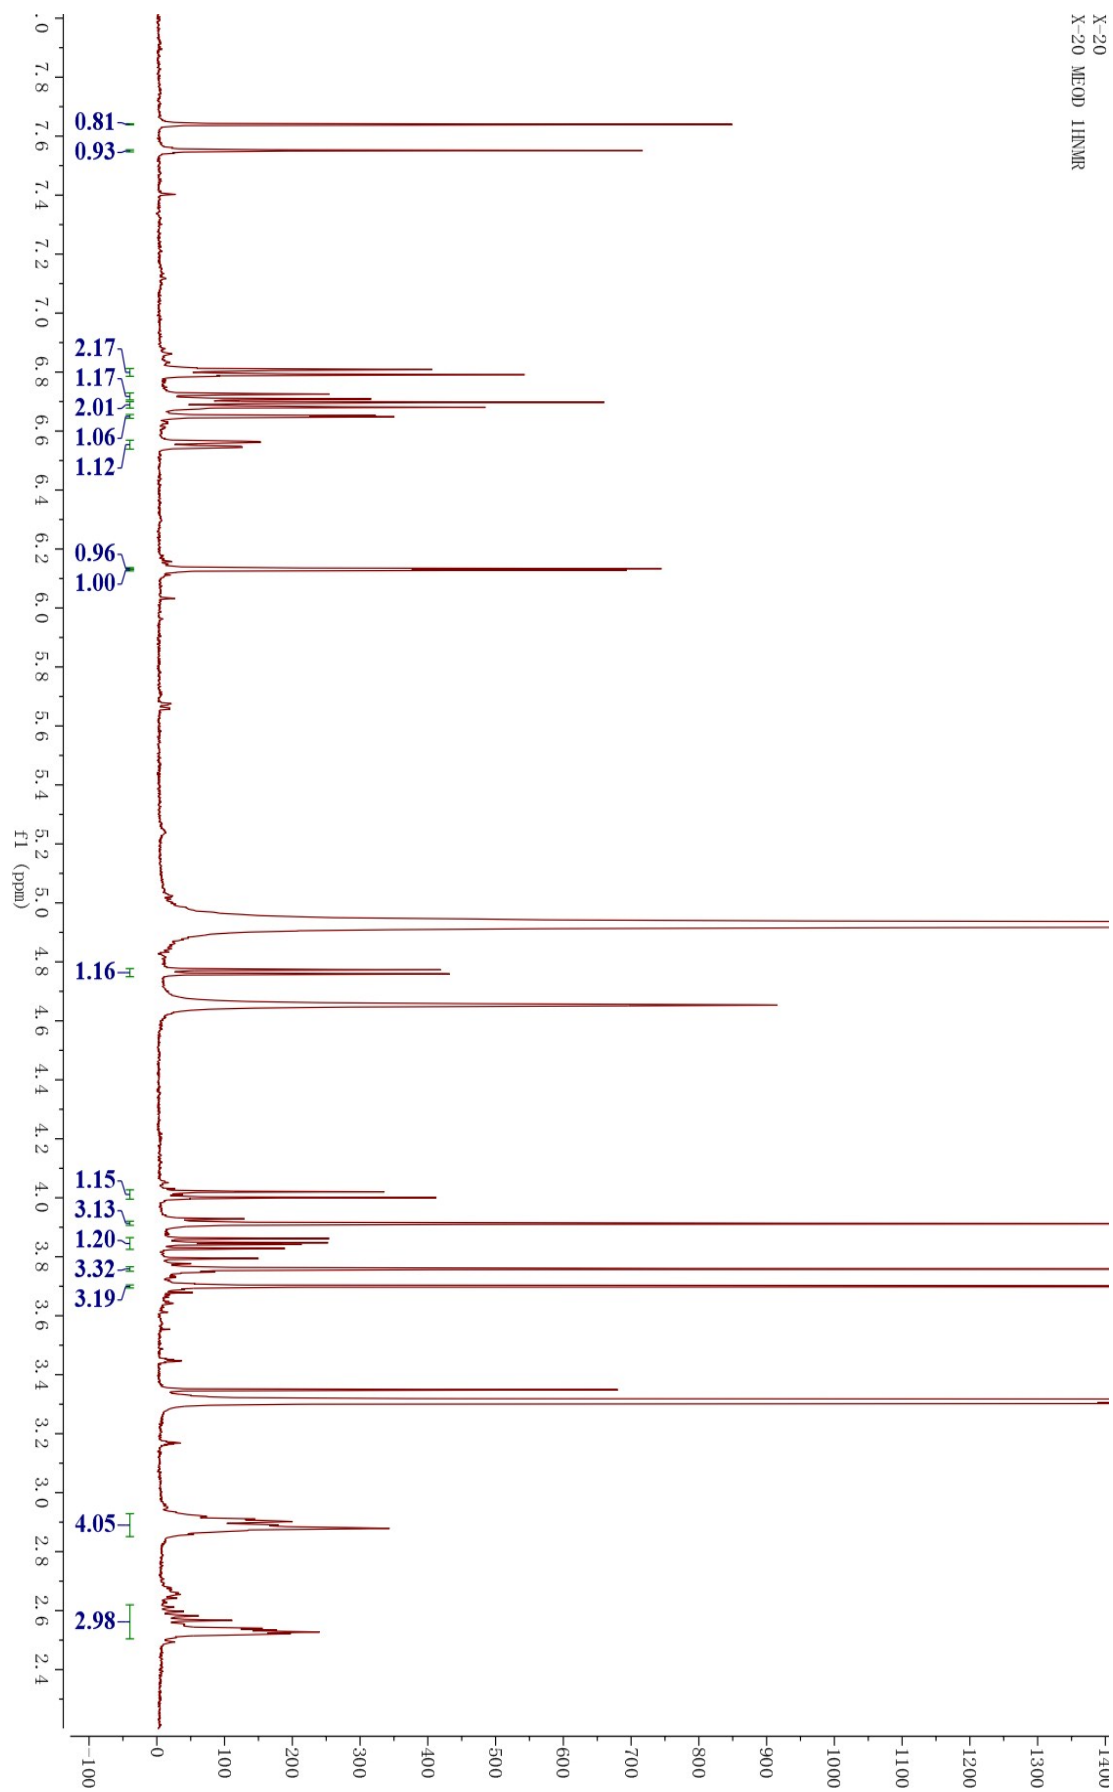

Figure S65. <sup>1</sup>H NMR spectrum (500 MHz) of compound 9 in CD<sub>3</sub>OD.

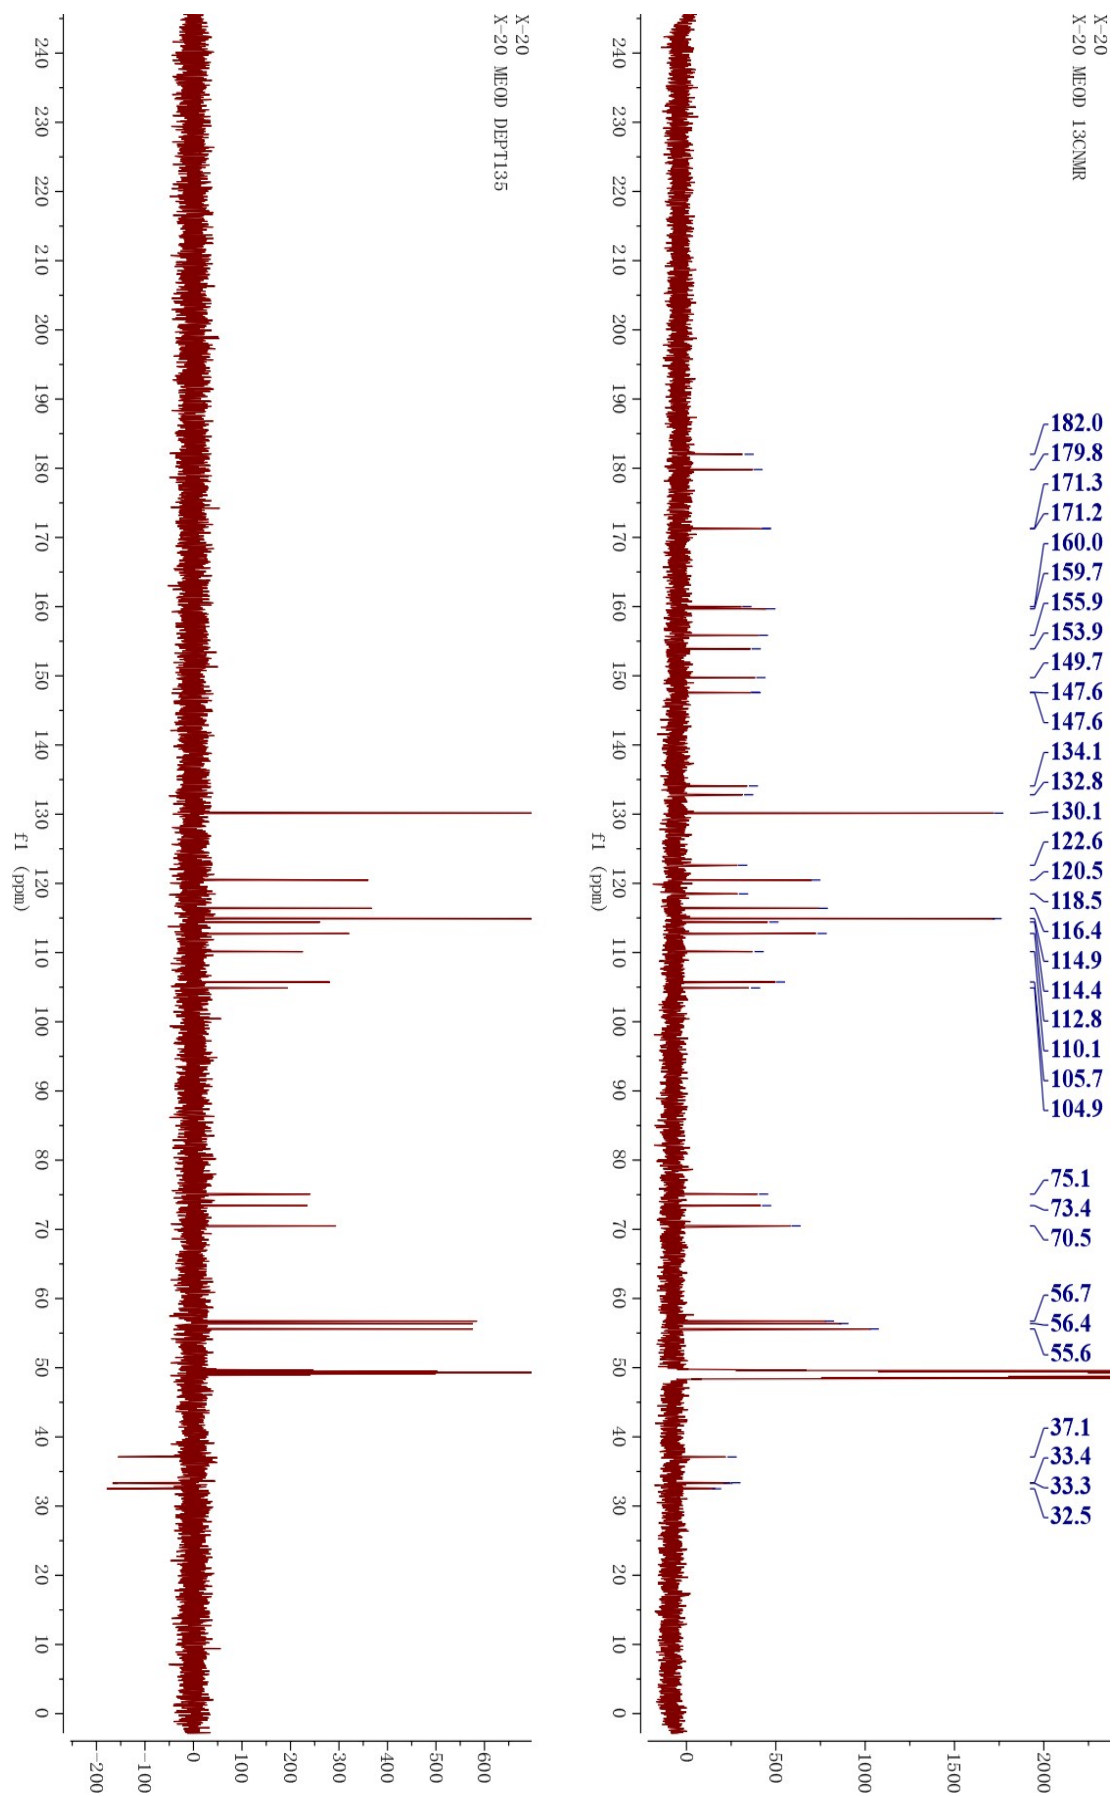

**Figure S66.**  $^{13}\text{C}$  NMR spectrum (125 MHz) of compound **9** in  $\text{CD}_3\text{OD}$ .

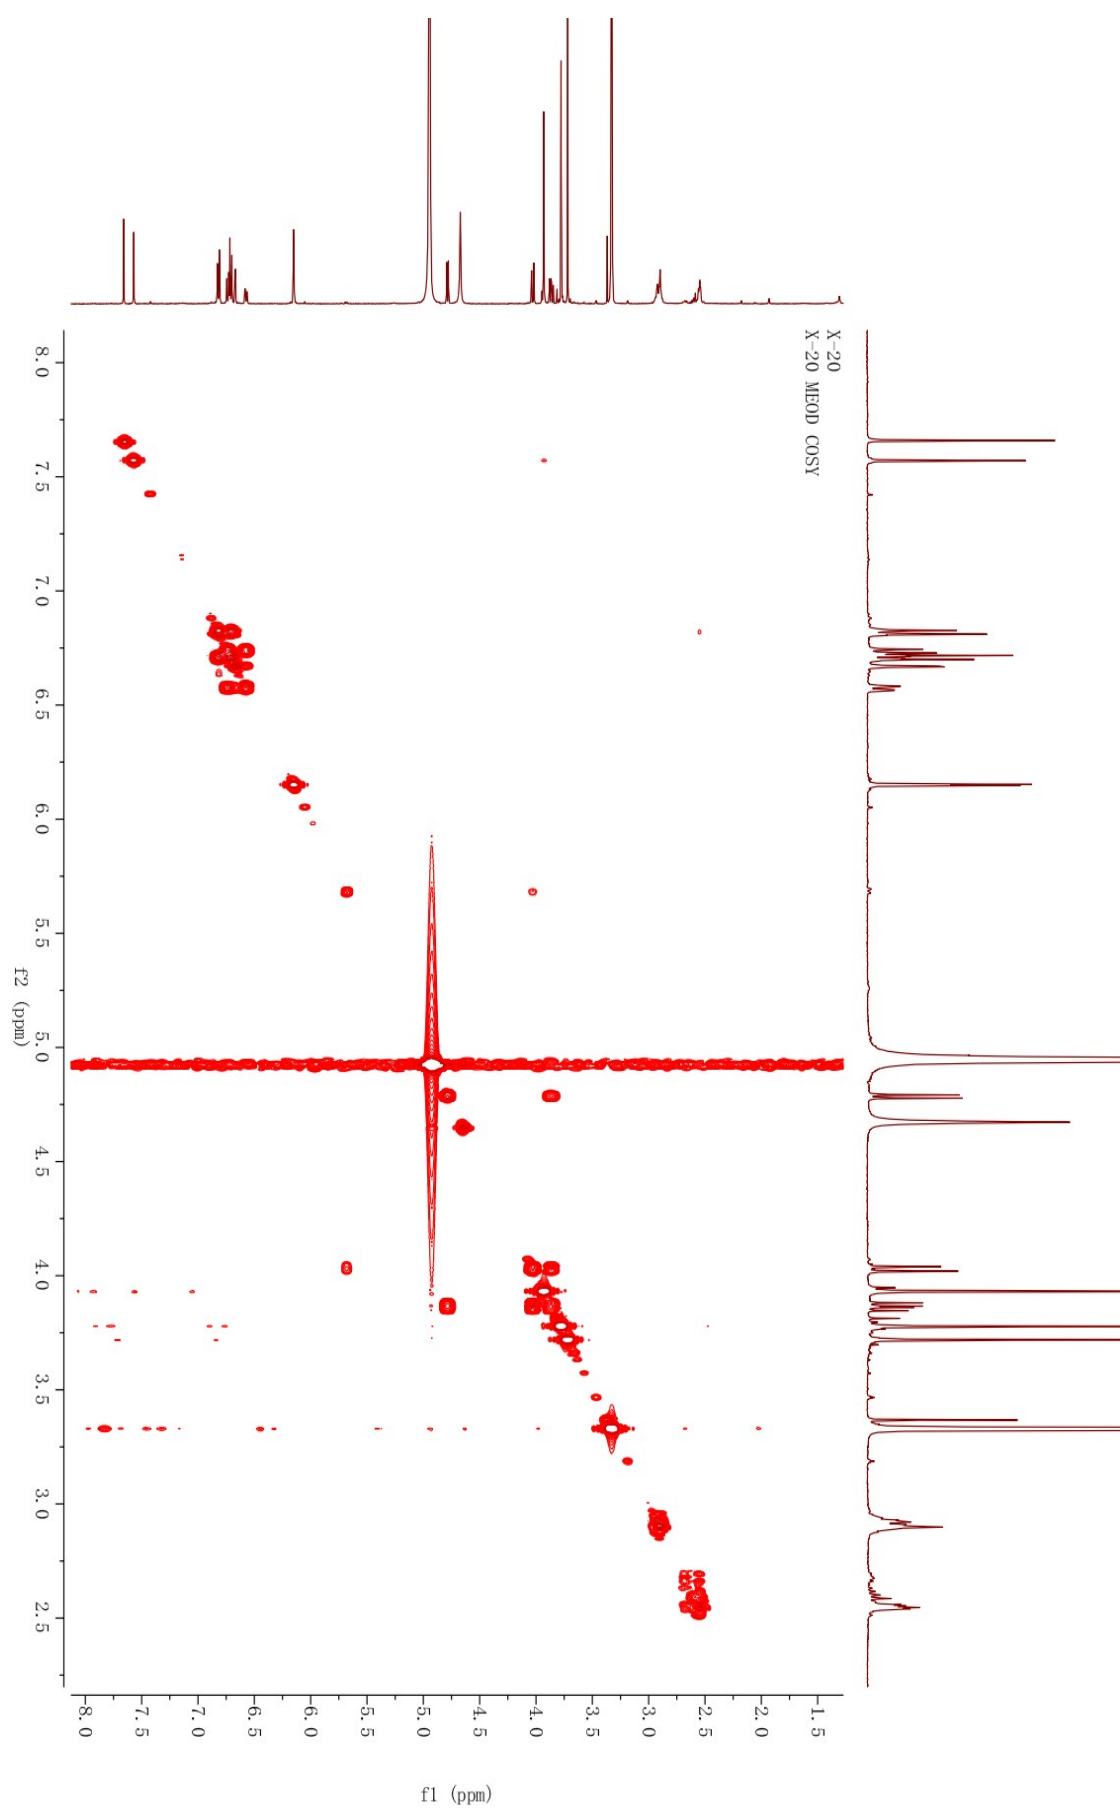

**Figure S67.**  $^1\text{H}$ - $^1\text{H}$  COSY spectrum of compound **9** in  $\text{CD}_3\text{OD}$ .

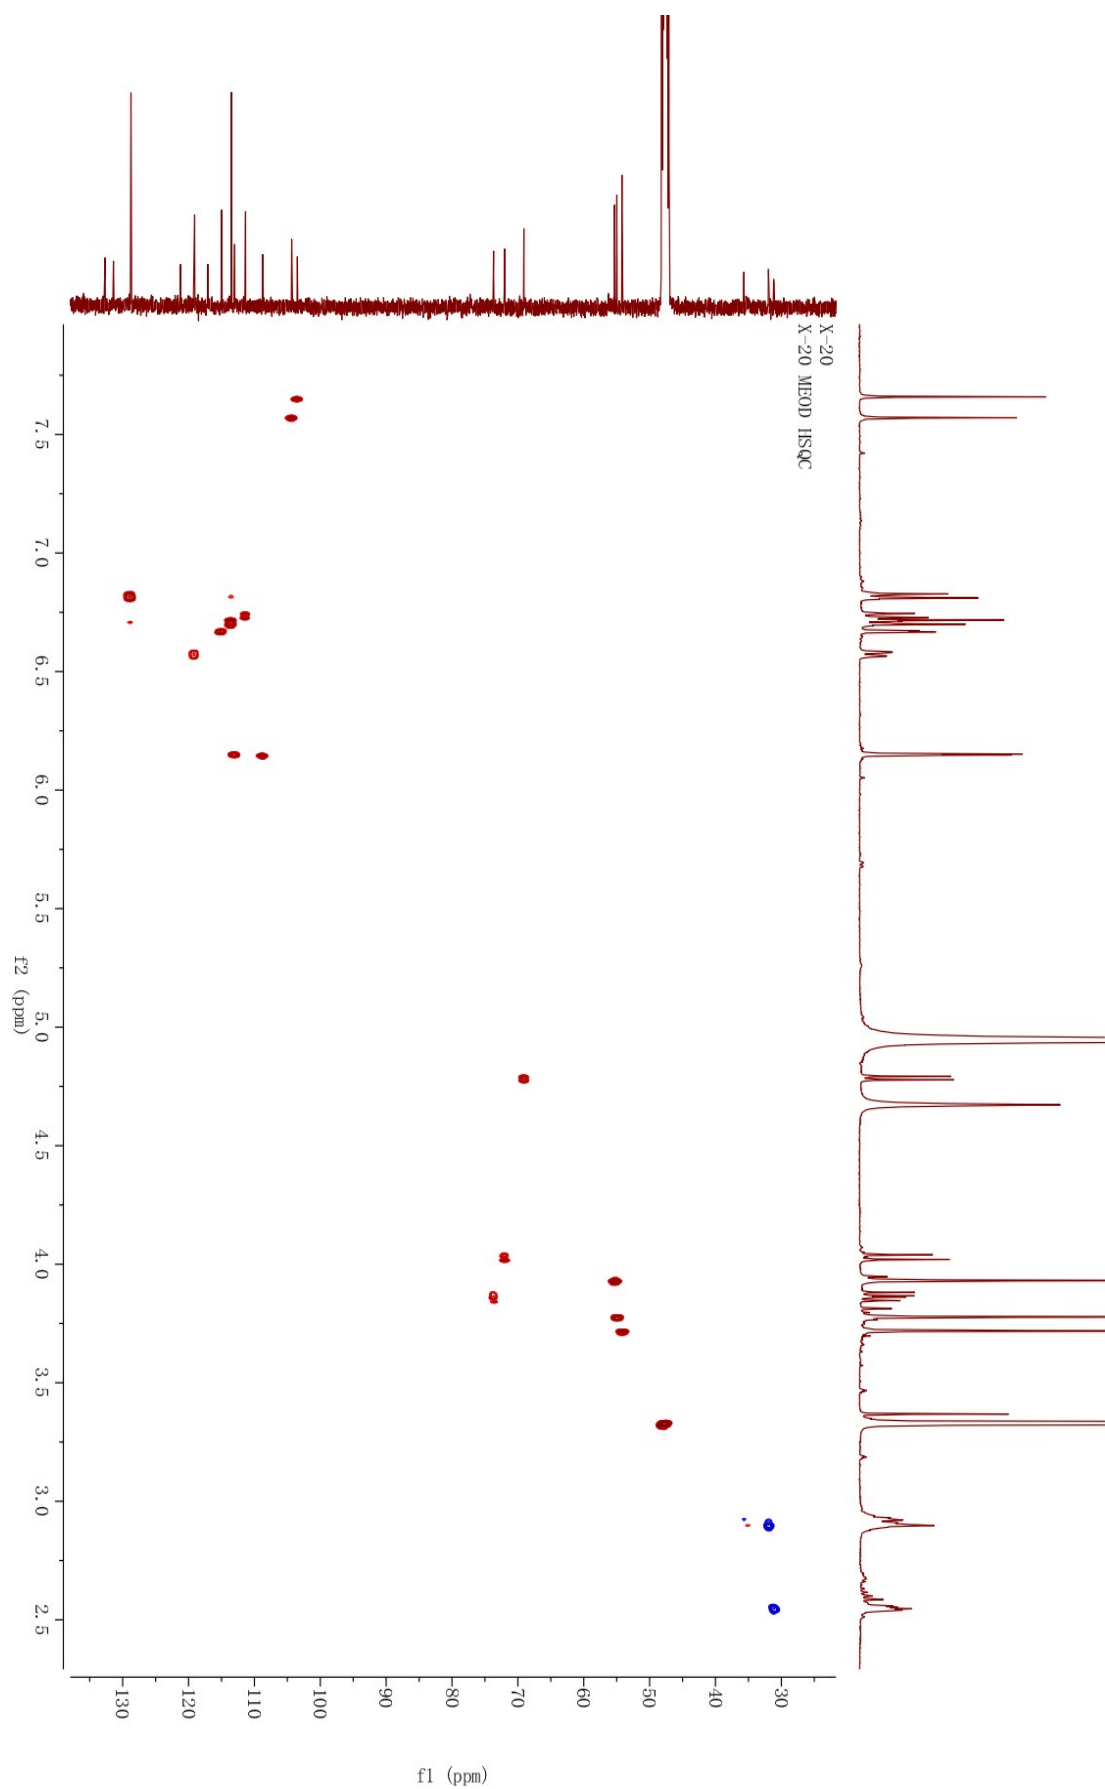

**Figure S68.** HSQC spectrum of compound **9** in CD<sub>3</sub>OD.



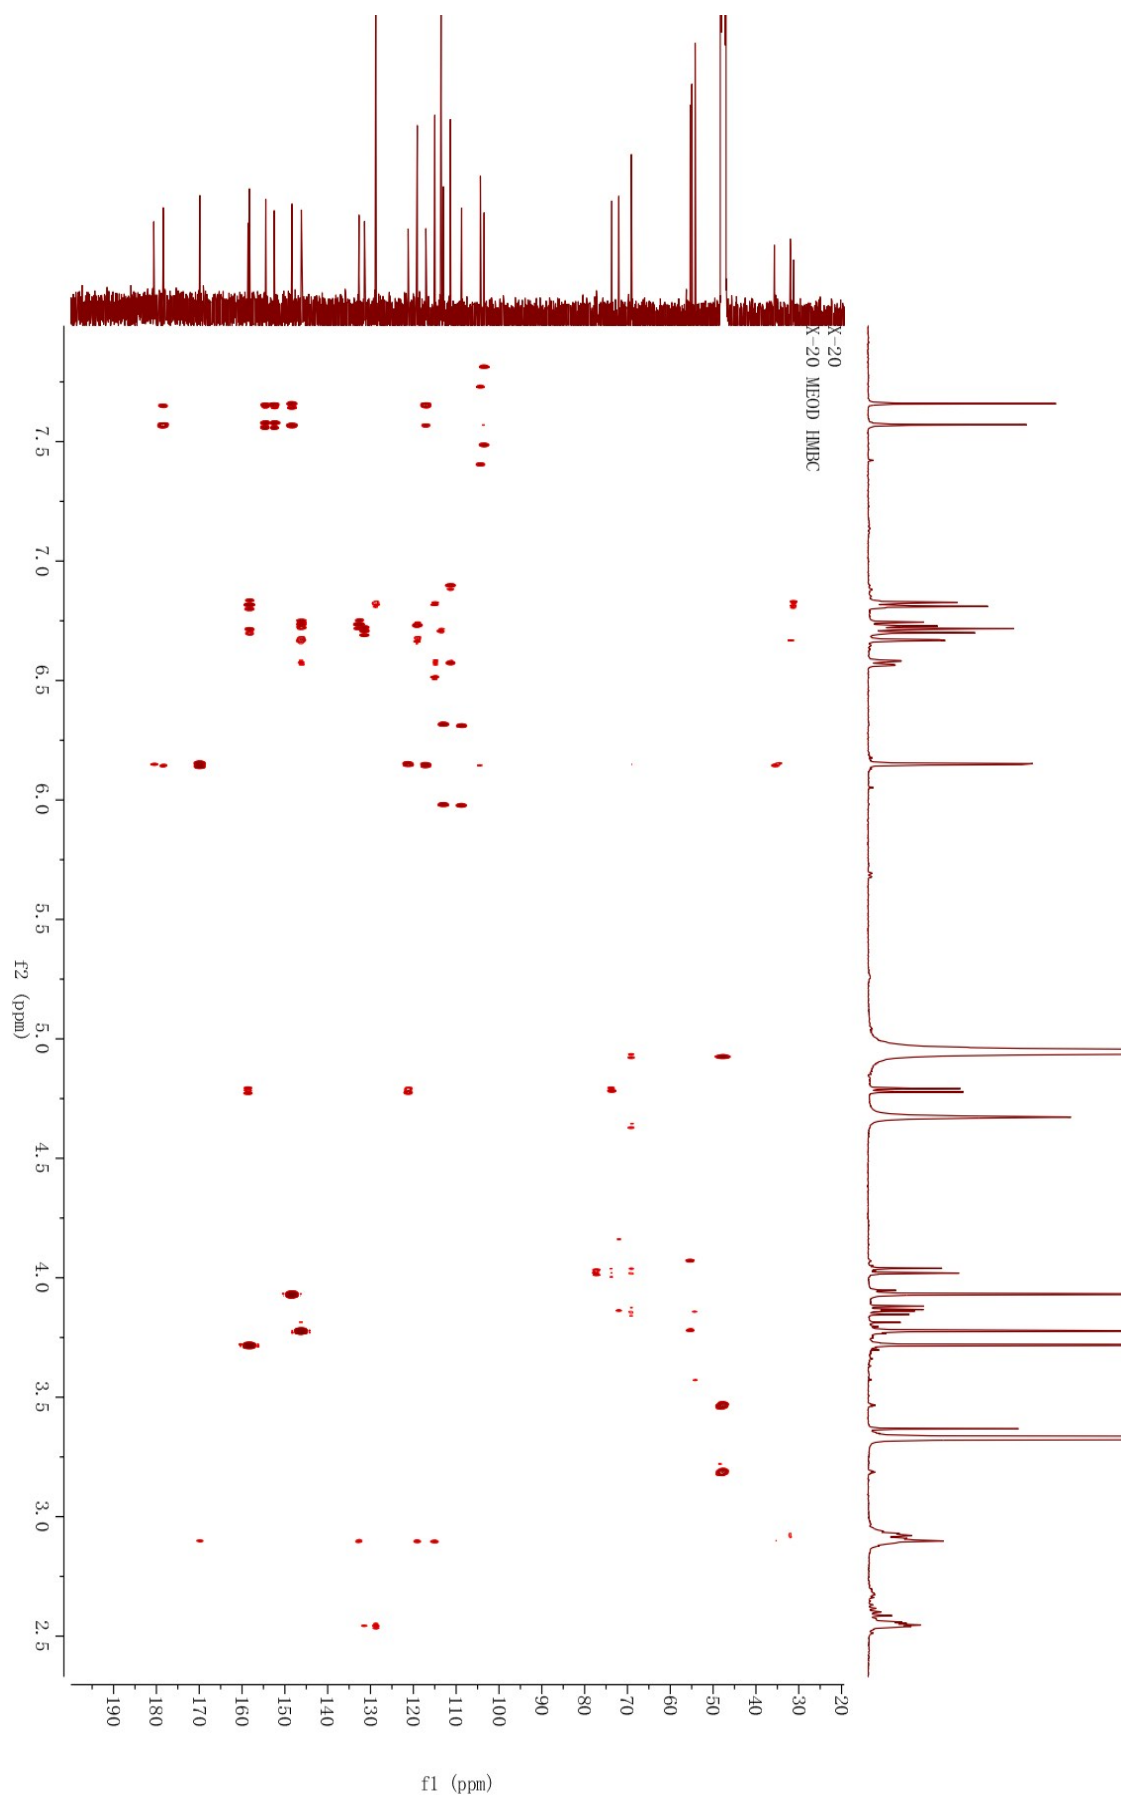

**Figure S69.** HMBC spectrum of compound **9** in CD<sub>3</sub>OD.

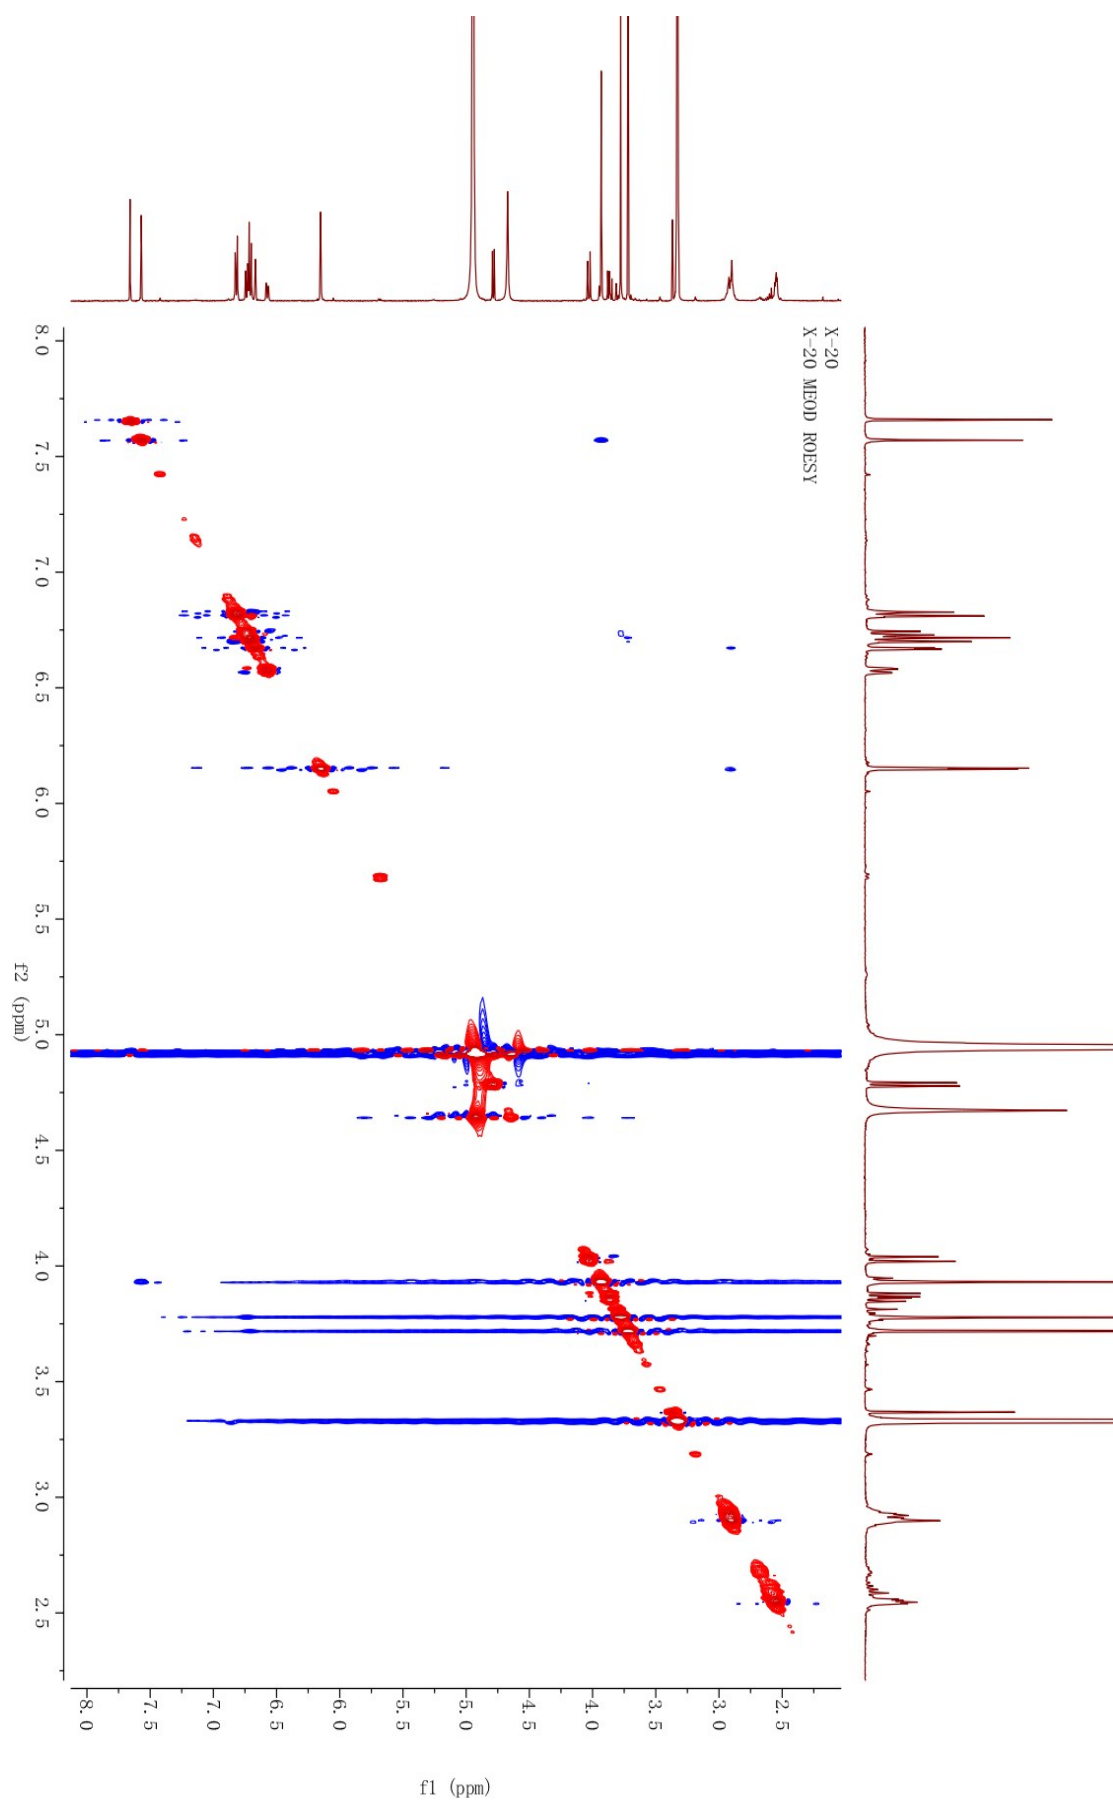

**Figure S70.** ROESY spectrum of compound **9** in CD<sub>3</sub>OD.

## Qualitative Analysis Report

|                        |              |               |                     |
|------------------------|--------------|---------------|---------------------|
| Data Filename          | HK-DHF-80-.d | Sample Name   | HK-DHF-80           |
| Sample Type            | Sample       | Position      | P1-D8               |
| Instrument Name        | Instrument 1 | User Name     |                     |
| Acq Method             | SIBU-ESI-i.m | Acquired Time | 2/5/2018 5:58:34 PM |
| IRM Calibration Status | Success      | DA Method     | Default.m           |

Comment

Sample Group Info.

Acquisition SW 6200 series TOF/6500 series

Version Q-TOF B.05.01 (B5125.2)

### User Spectra

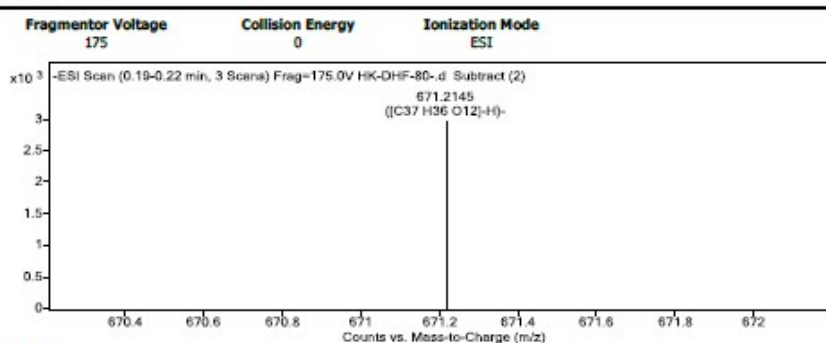

#### Peak List

| m/z      | z | Abund    |
|----------|---|----------|
| 339.2344 | 1 | 34566.72 |
| 340.2375 | 1 | 7758.13  |
| 341.1043 | 1 | 11185.37 |
| 369.2447 | 1 | 12446.29 |
| 713.4753 | 1 | 7309.66  |
| 740.494  | 1 | 16431.98 |
| 826.5586 | 1 | 6971.37  |
| 853.5782 | 1 | 11846.47 |

#### Formula Calculator Element Limits

| Element | Min | Max |
|---------|-----|-----|
| C       | 3   | 60  |
| H       | 0   | 120 |
| O       | 0   | 30  |
| N       | 0   | 3   |
| S       | 0   | 3   |

#### Formula Calculator Results

| Formula     | CalculatedMass | CalculatedMz | Mz       | Diff. (mDa) | Diff. (ppm) | DBE     |
|-------------|----------------|--------------|----------|-------------|-------------|---------|
| C37 H36 O12 | 672.2207       | 671.2134     | 671.2145 | -1.10       | -1.64       | 20.0000 |

--- End Of Report ---

**Figure S71.** HRESIMS spectrum of compound **9**.

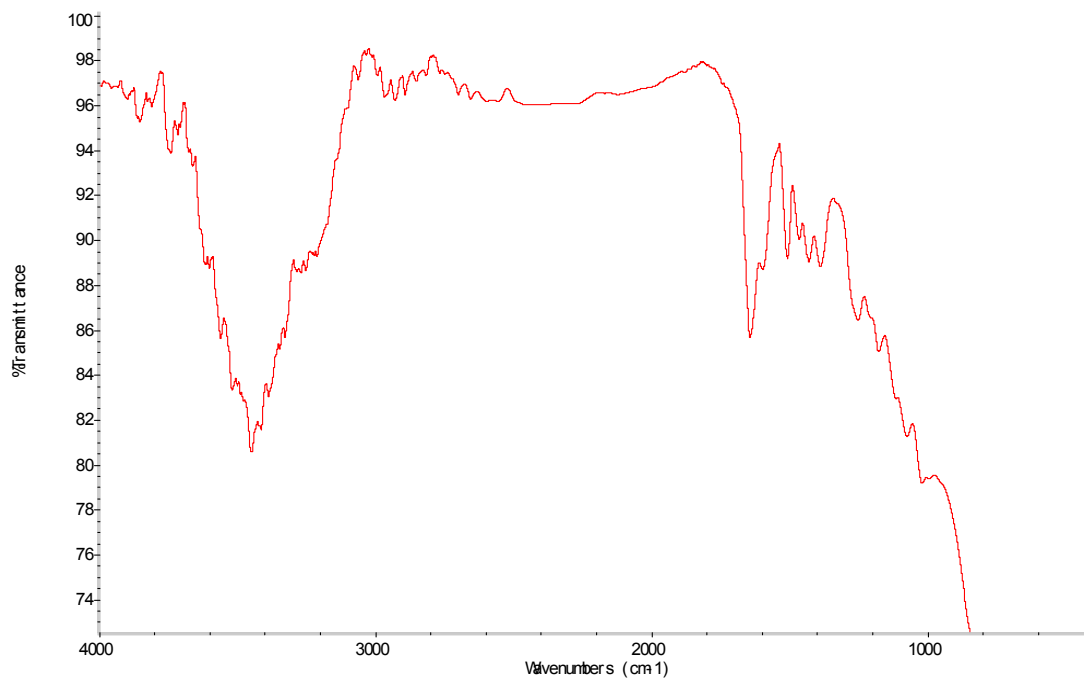

**Figure S72.** IR spectrum of compound **9**.

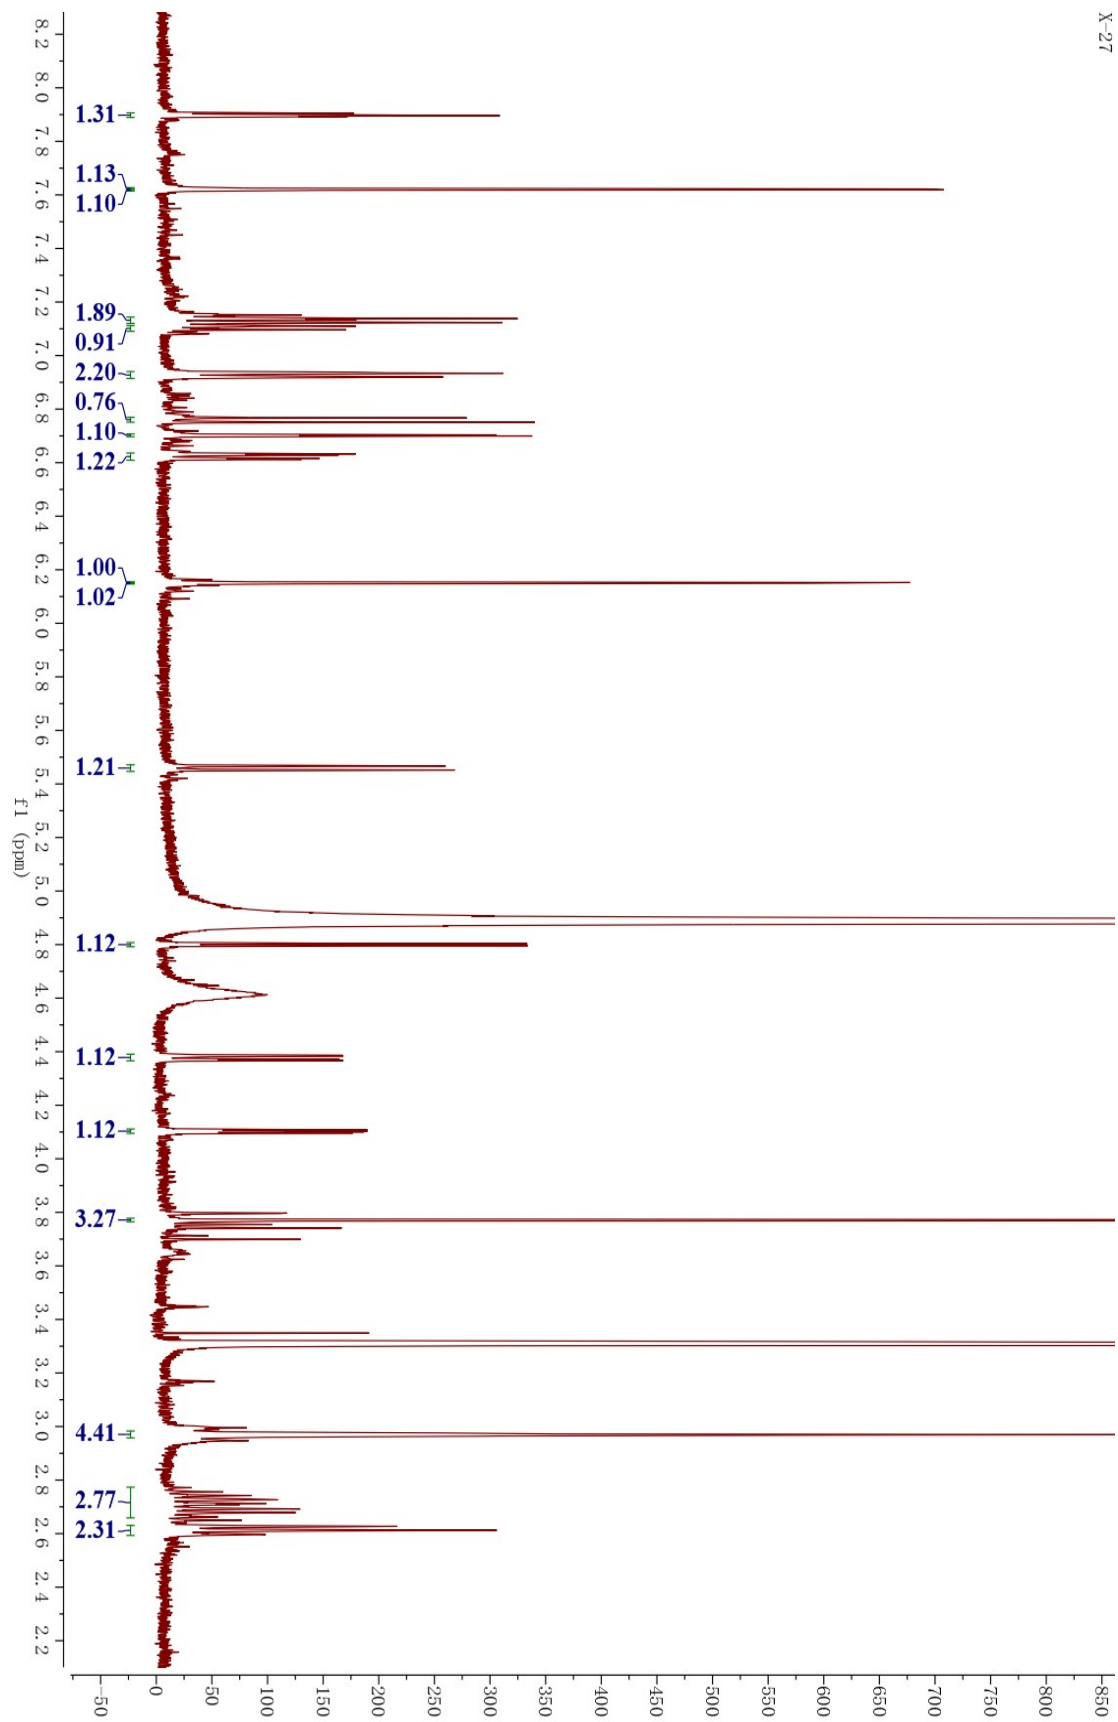

**Figure S73.**  $^1\text{H}$  NMR spectrum (500 MHz) of compound **10** in  $\text{CD}_3\text{OD}$ .

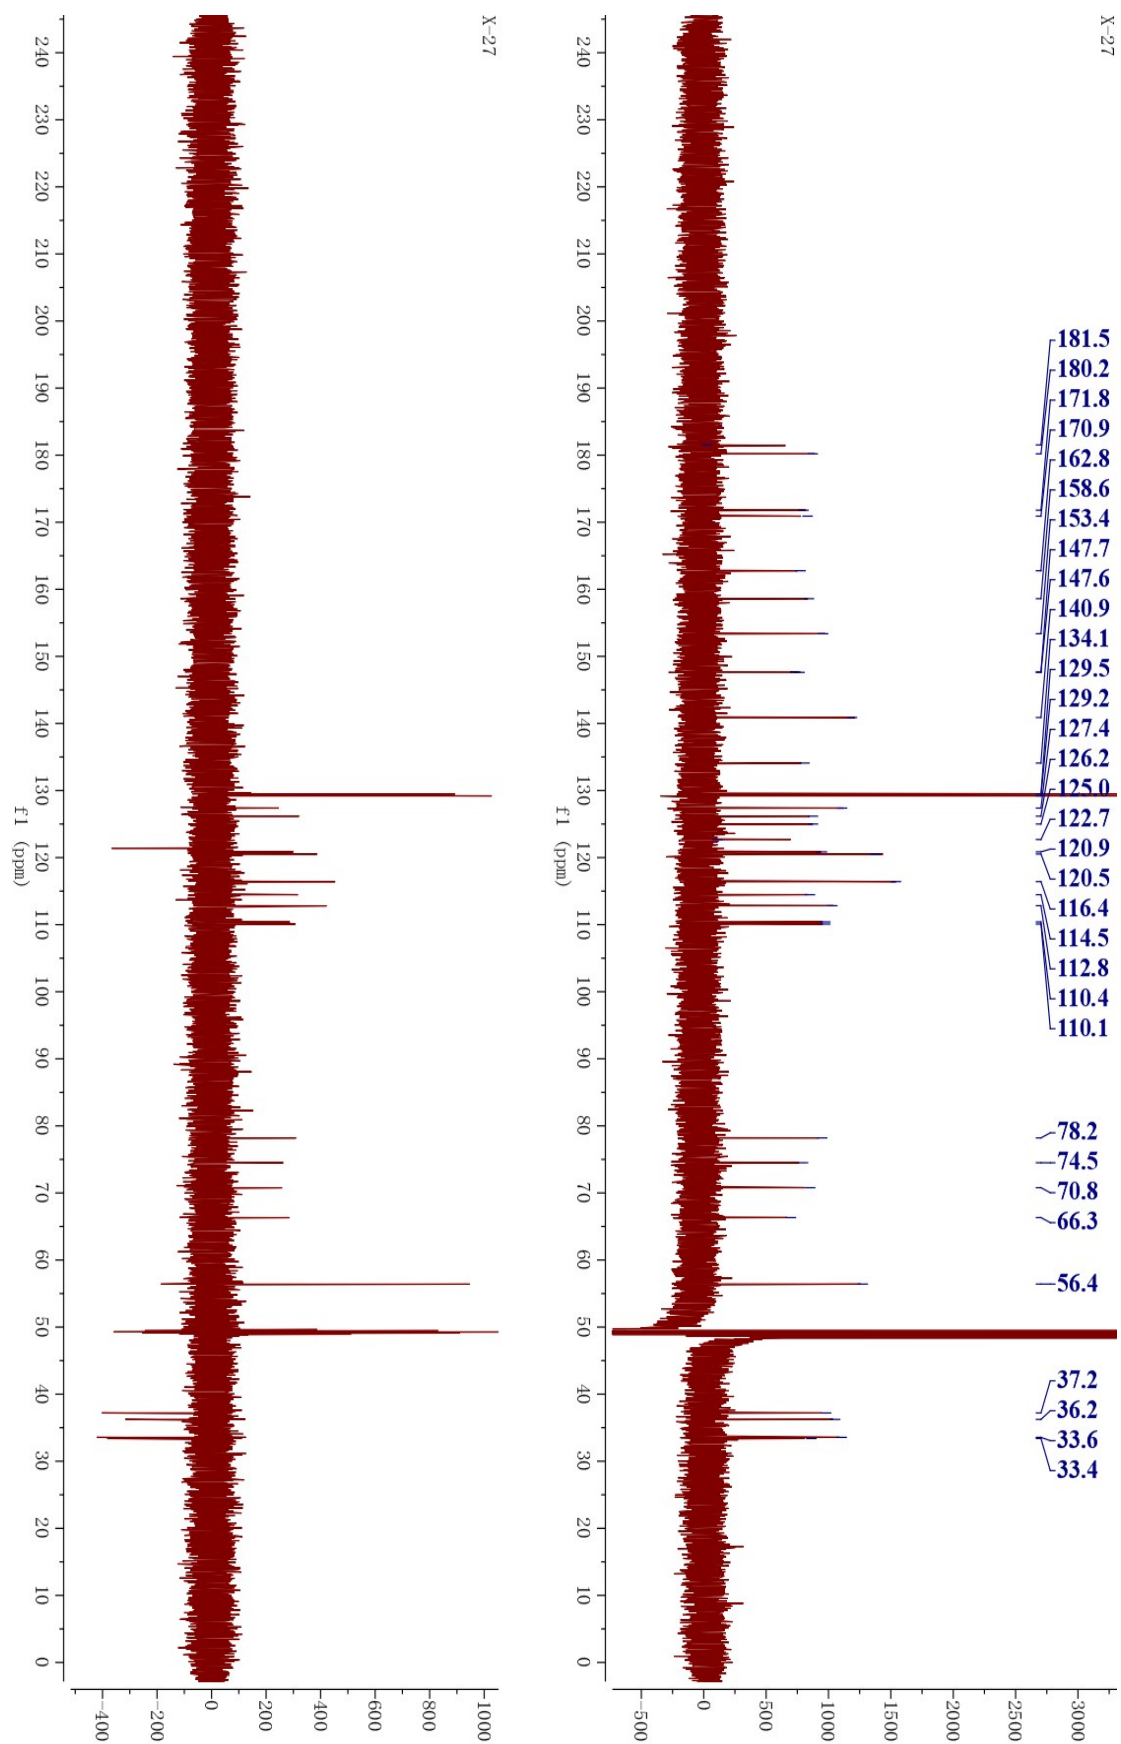

**Figure S74.** <sup>13</sup>C NMR spectrum (125 MHz) of compound **10** in CD<sub>3</sub>OD.

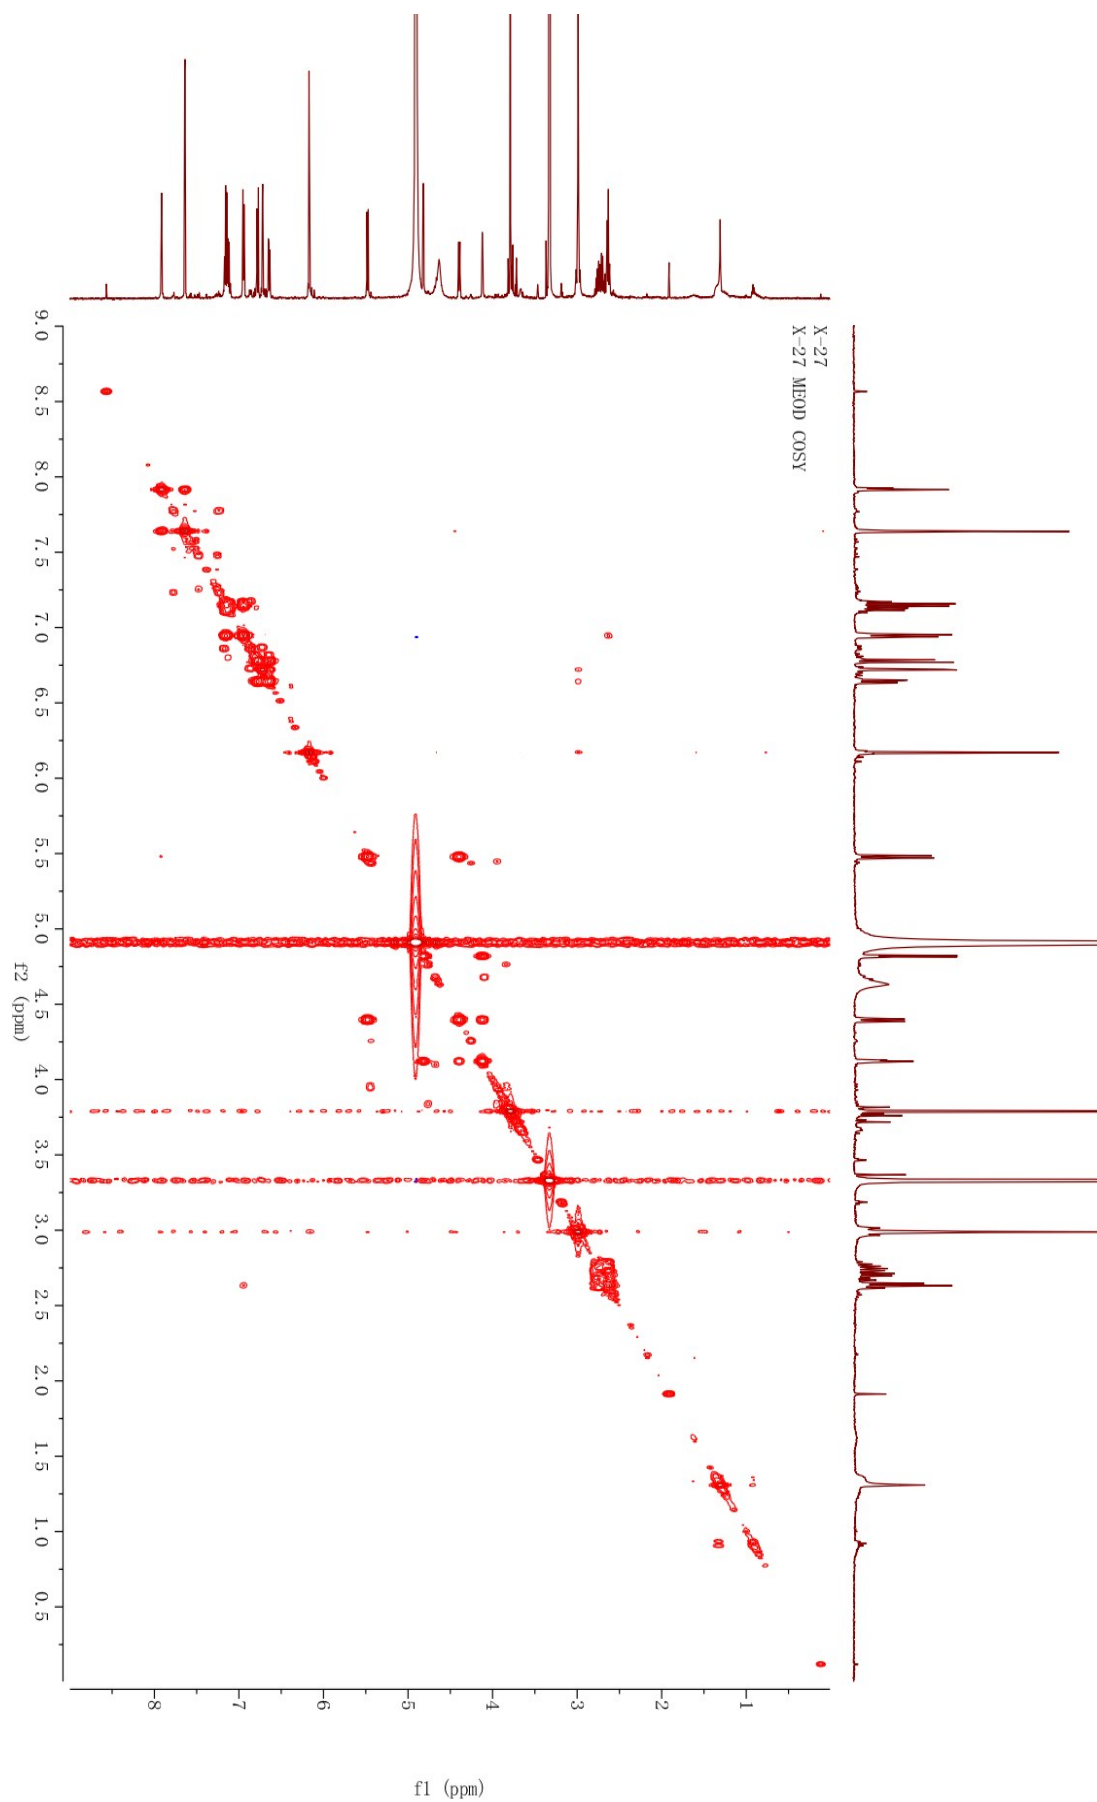

**Figure S75.**  $^1\text{H}$ - $^1\text{H}$  COSY spectrum of compound **10** in  $\text{CD}_3\text{OD}$ .

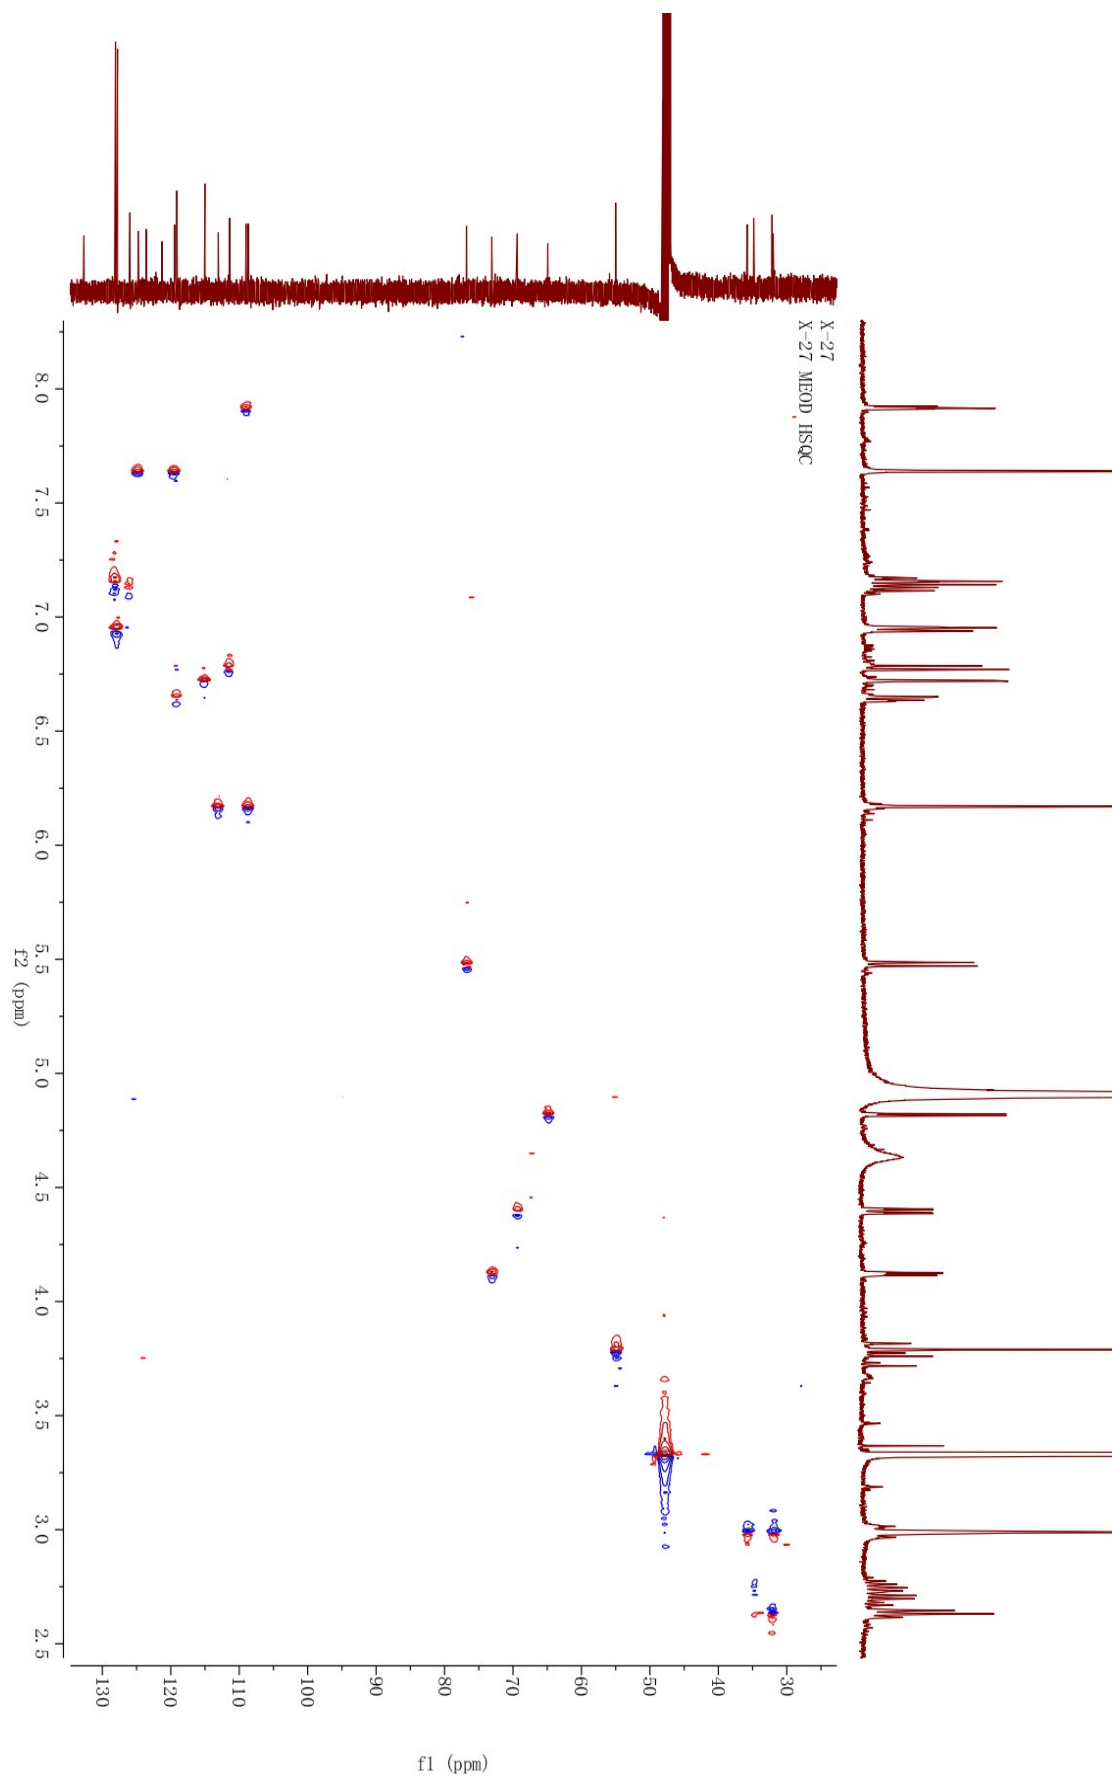

**Figure S76.** HSQC spectrum of compound **10** in CD<sub>3</sub>OD.



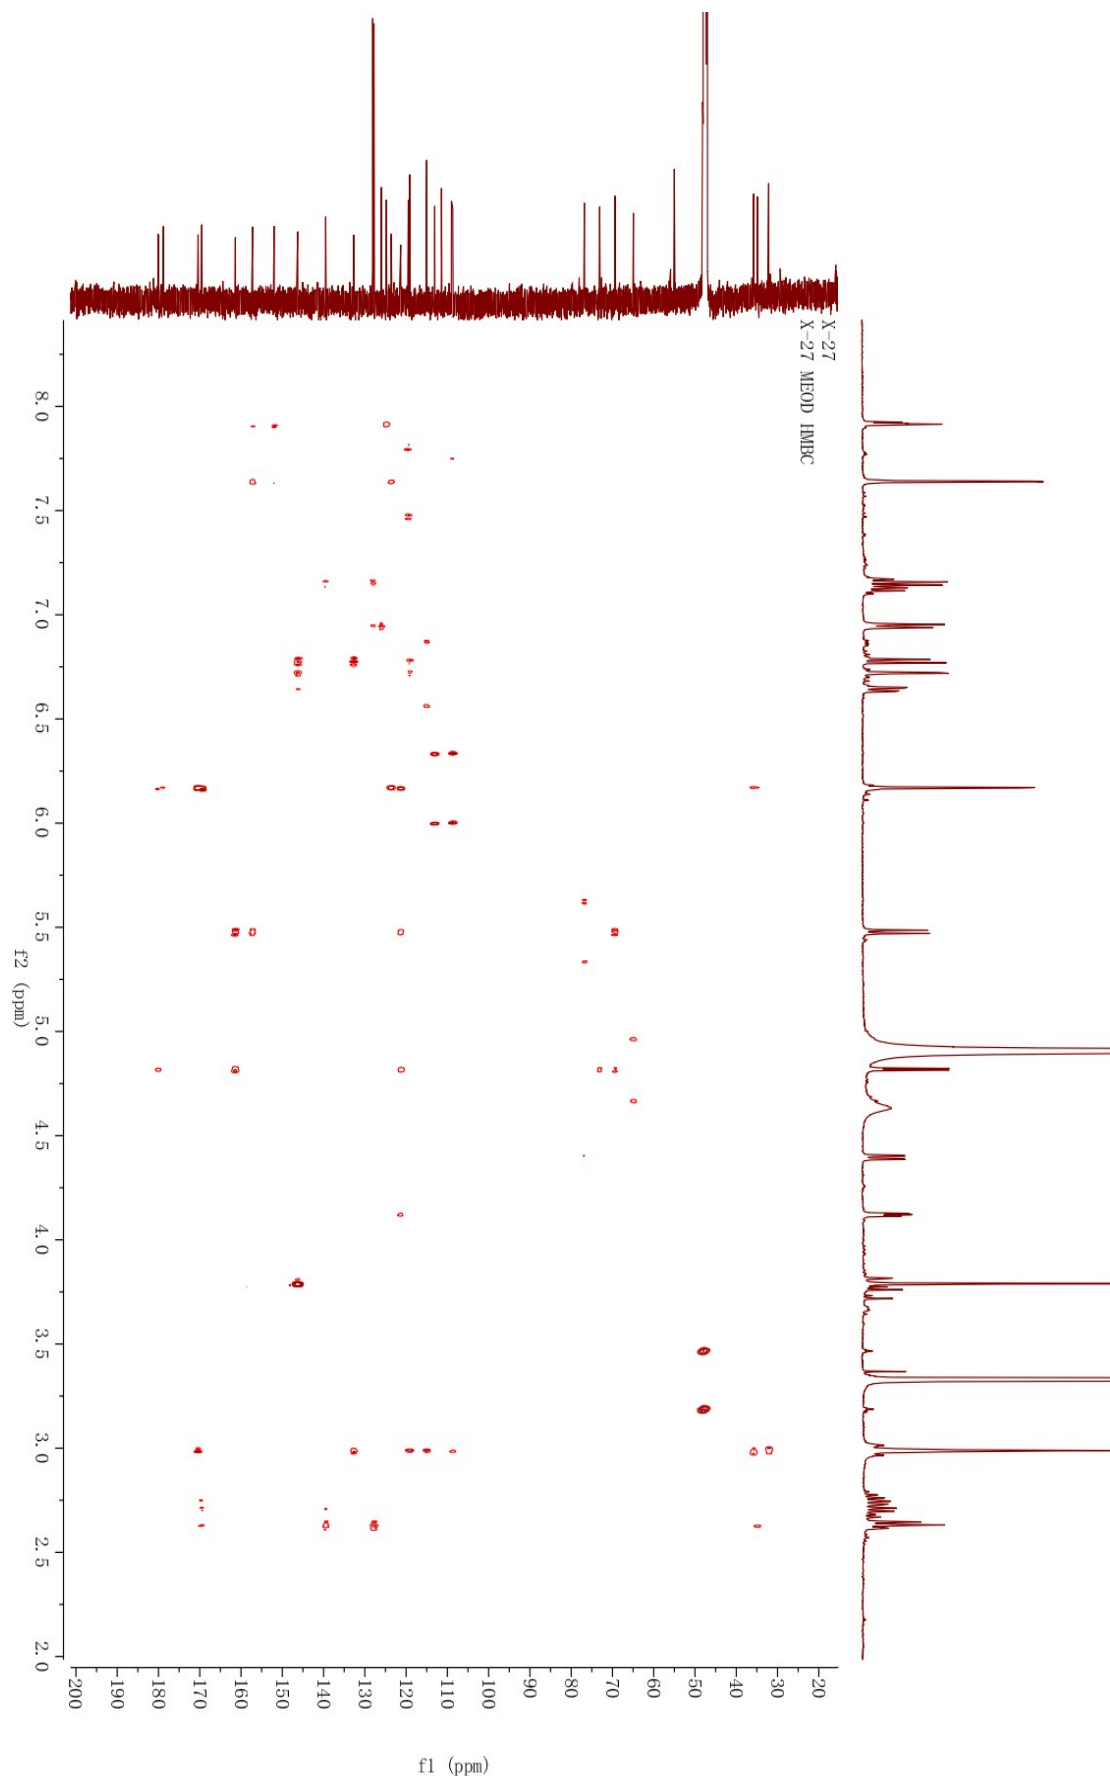

**Figure S77.** HMBC spectrum of compound **10** in CD<sub>3</sub>OD.

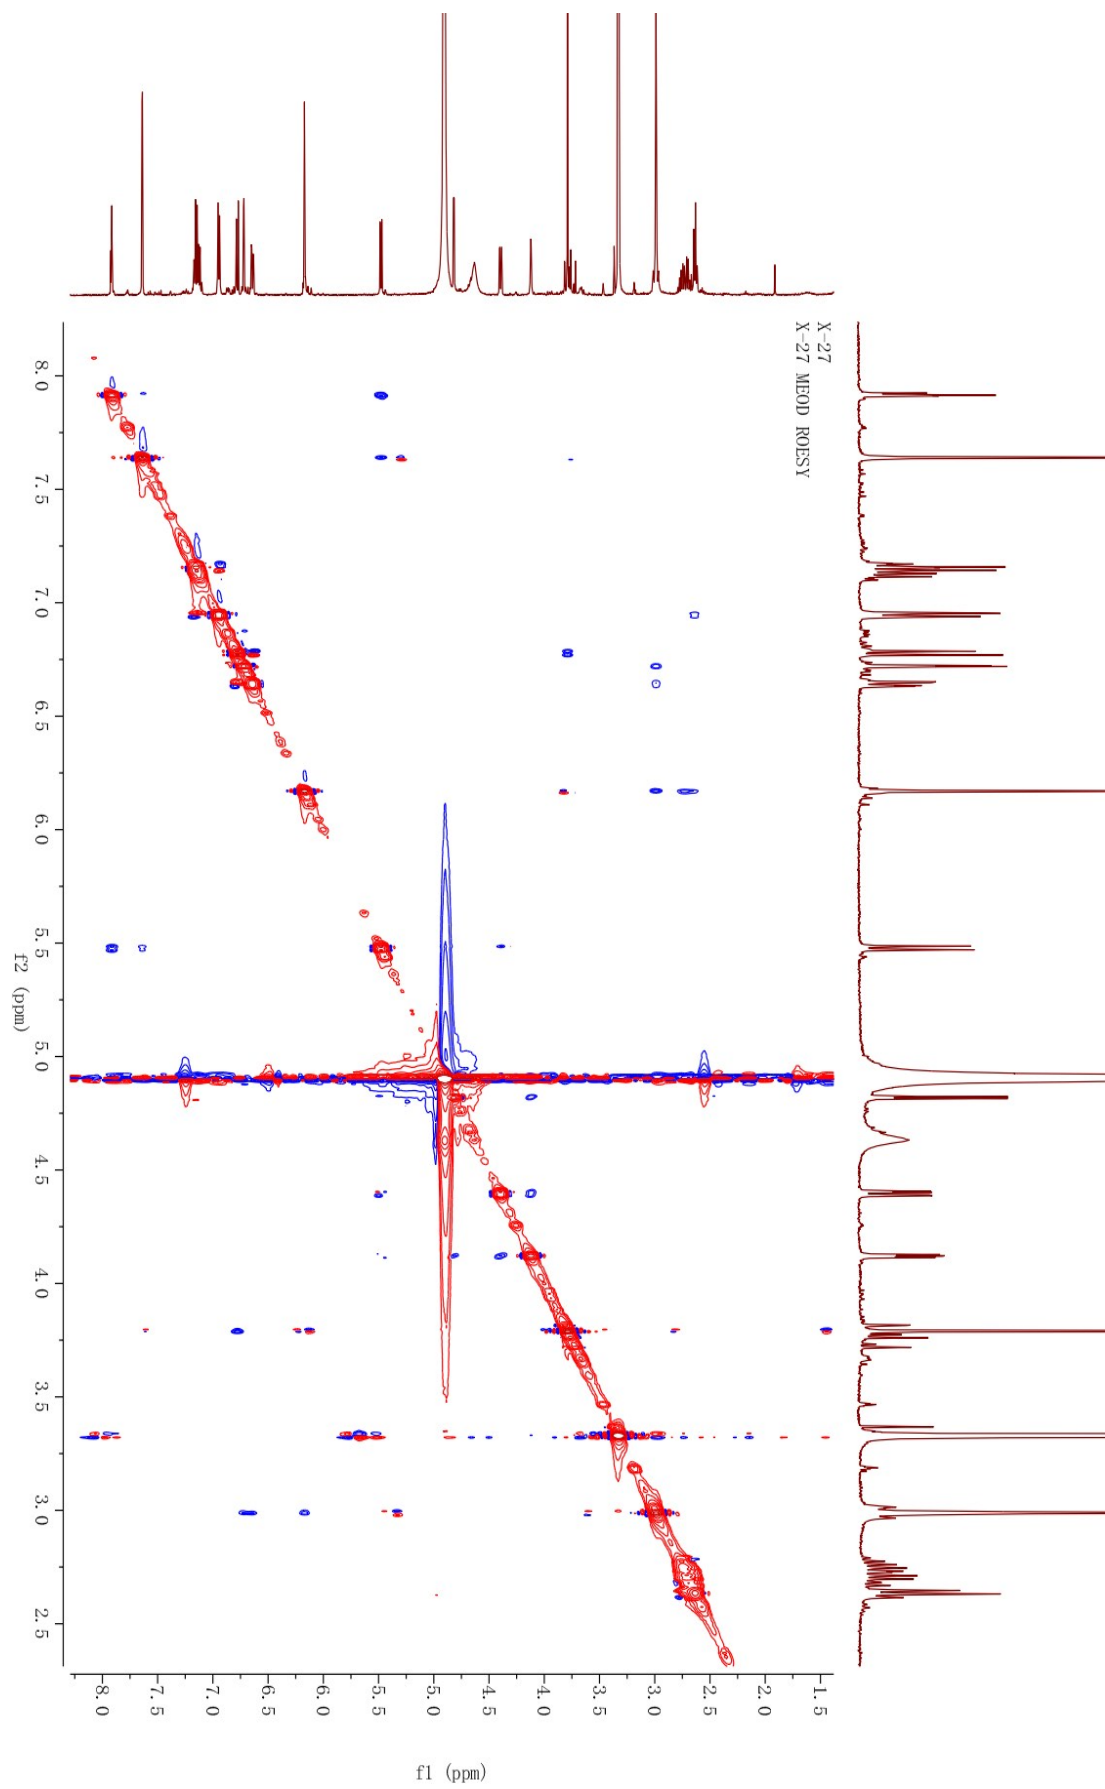

**Figure S78.** ROESY spectrum of compound **10** in CD<sub>3</sub>OD.

## Compound Spectrum SmartFormula Report

### Analysis Info

Analysis Name D:\Data\A501\Wanghui\X-27.d  
 Method DirectInfusion - MS - positive.m  
 Sample Name kfd-8-25  
 Comment

Acquisition Date 2017-12-15 18:23:29  
 Operator Demo User  
 Instrument compact 8255754.20158

### Acquisition Parameter

|             |            |                      |          |                  |           |
|-------------|------------|----------------------|----------|------------------|-----------|
| Source Type | ESI        | Ion Polarity         | Positive | Set Nebulizer    | 0.4 Bar   |
| Focus       | Not active | Set Capillary        | 4500 V   | Set Dry Heater   | 180 °C    |
| Scan Begin  | 50 m/z     | Set End Plate Offset | -500 V   | Set Dry Gas      | 4.0 l/min |
| Scan End    | 1300 m/z   | Set Charging Voltage | 2000 V   | Set Divert Valve | Source    |
|             |            | Set Corona           | 0 nA     | Set APCI Heater  | 0 °C      |

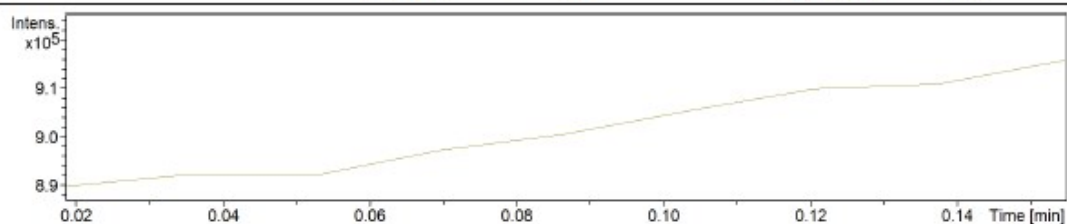

### +MS, 0.1min #5

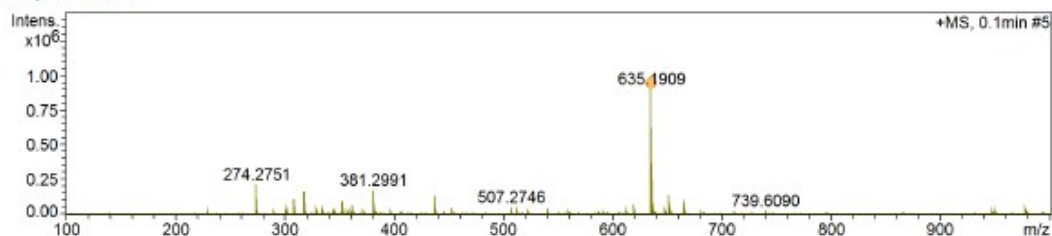

| # | Ion Formula  | m/z      | err [mDa] | err [ppm] | mSigma | rdB  | e <sup>-</sup> Conf | N-Rule |
|---|--------------|----------|-----------|-----------|--------|------|---------------------|--------|
| 1 | C37H31O10    | 635.1912 | 0.3       | 0.4       | 1.6    | 23.0 | even                | ok     |
| 1 | C36H28N4NaO6 | 635.1901 | -0.8      | -1.3      | 3.8    | 25.0 | even                | ok     |
| 1 | C34H28KN8O3  | 635.1916 | 0.7       | 1.1       | 27.6   | 25.0 | even                | ok     |
| 2 | C34H23N10O4  | 635.1898 | -1.1      | -1.7      | 6.0    | 29.0 | even                | ok     |
| 2 | C33H20N14Na  | 635.1888 | -2.2      | -3.4      | 10.0   | 31.0 | even                | ok     |
| 2 | C30H24KN14O  | 635.1889 | -2.0      | -3.2      | 28.4   | 26.0 | even                | ok     |
| 3 | C38H27N4O6   | 635.1925 | 1.6       | 2.5       | 10.3   | 28.0 | even                | ok     |
| 3 | C37H24N8NaO2 | 635.1914 | 0.5       | 0.8       | 11.6   | 30.0 | even                | ok     |
| 3 | C33H32KN4O7  | 635.1903 | -0.7      | -1.0      | 30.5   | 20.0 | even                | ok     |
| 4 | C35H19N14    | 635.1912 | 0.2       | 0.4       | 12.0   | 34.0 | even                | ok     |
| 4 | C35H32NaO10  | 635.1888 | -2.2      | -3.4      | 12.9   | 20.0 | even                | ok     |
| 4 | C32H36KO11   | 635.1889 | -2.0      | -3.1      | 36.6   | 15.0 | even                | ok     |
| 5 | C33H27N6O8   | 635.1885 | -2.4      | -3.8      | 14.2   | 24.0 | even                | ok     |

X-27.d

Bruker Compass DataAnalysis 4.4

printed: 2017-12-19 11:55:00

by: demo

Page 1 of 1

**Figure S79.** HRESIMS spectrum of compound **10**.

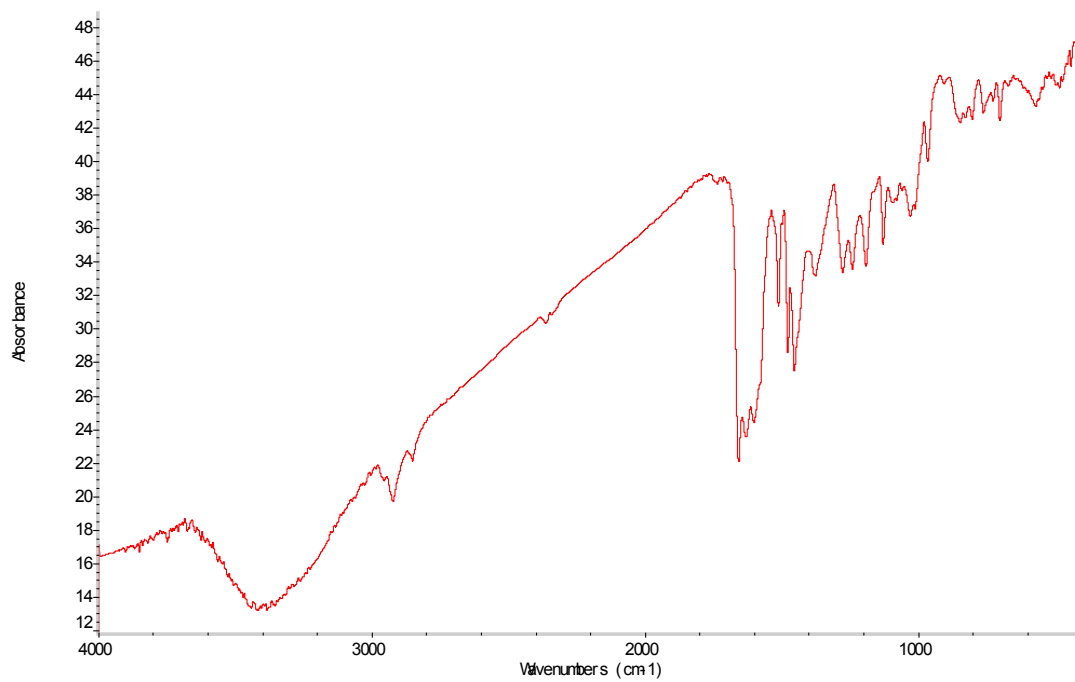

**Figure S80.** IR spectrum of compound **10**.

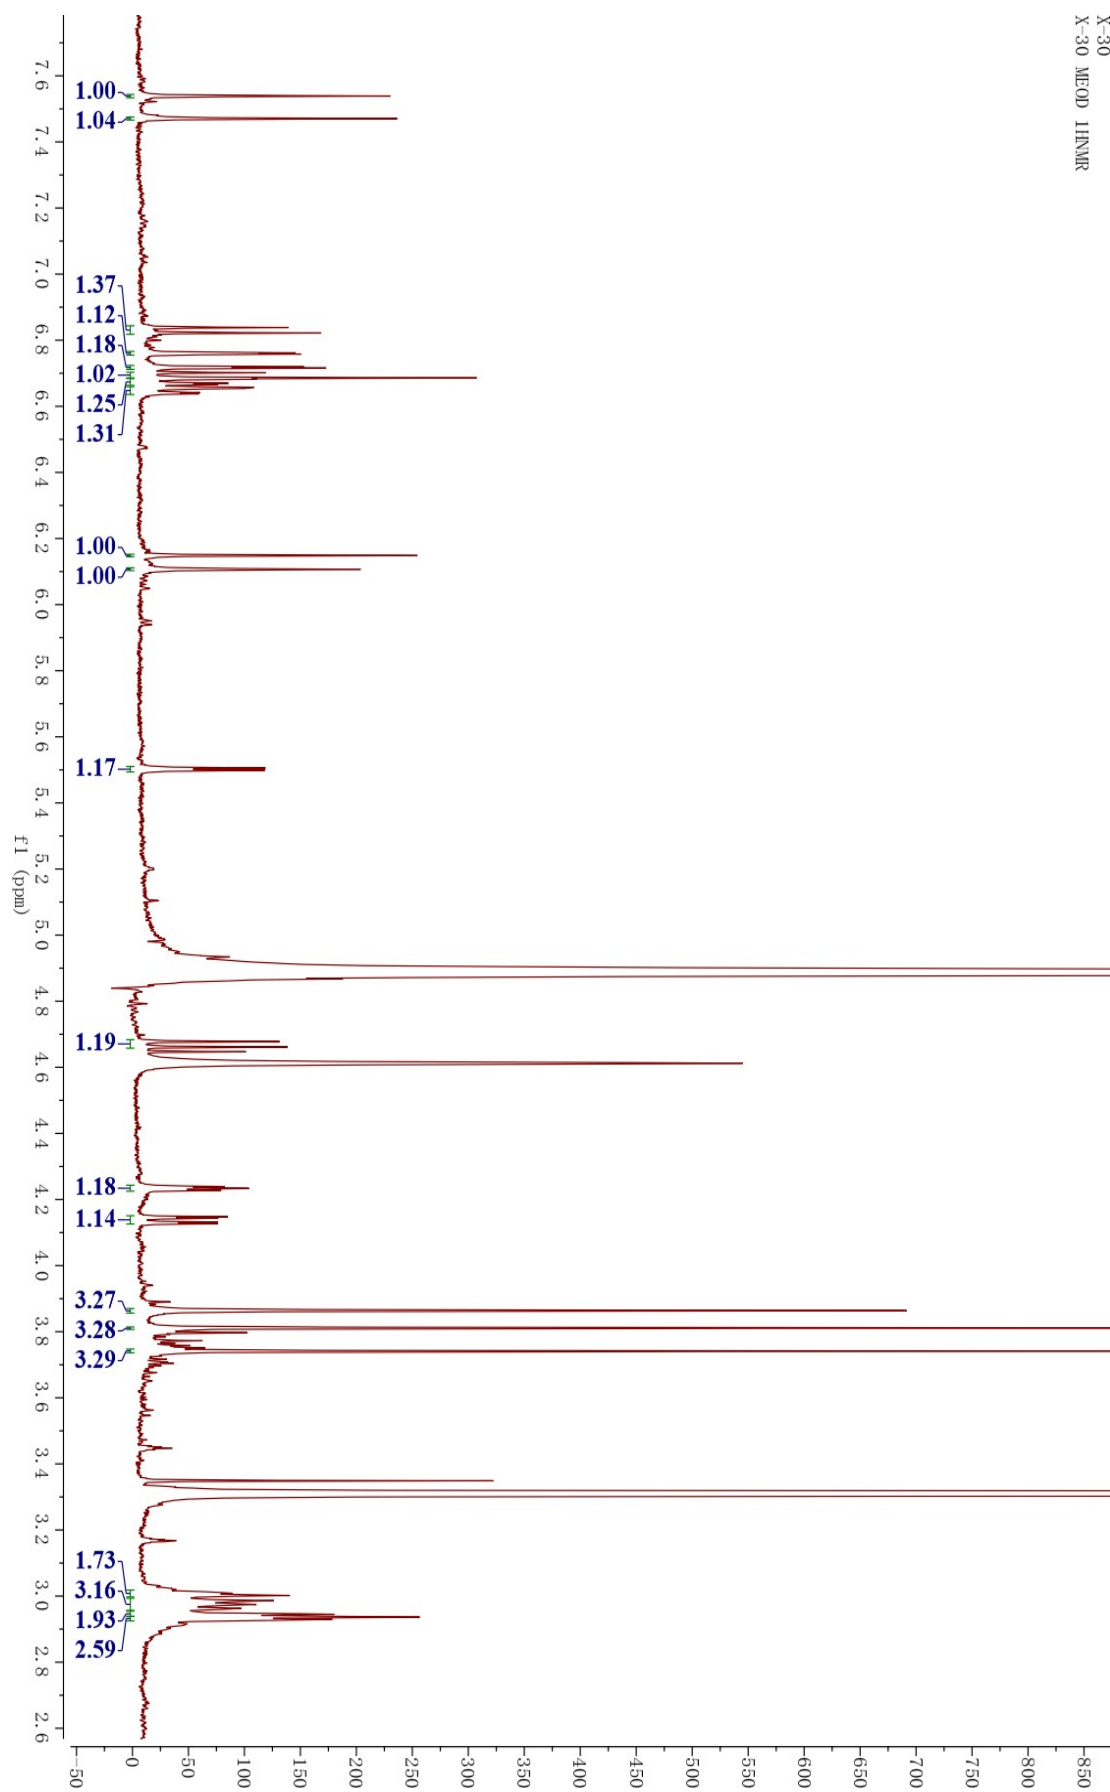

Figure S81. <sup>1</sup>H NMR spectrum (500 MHz) of compound 11 in CD<sub>3</sub>OD.

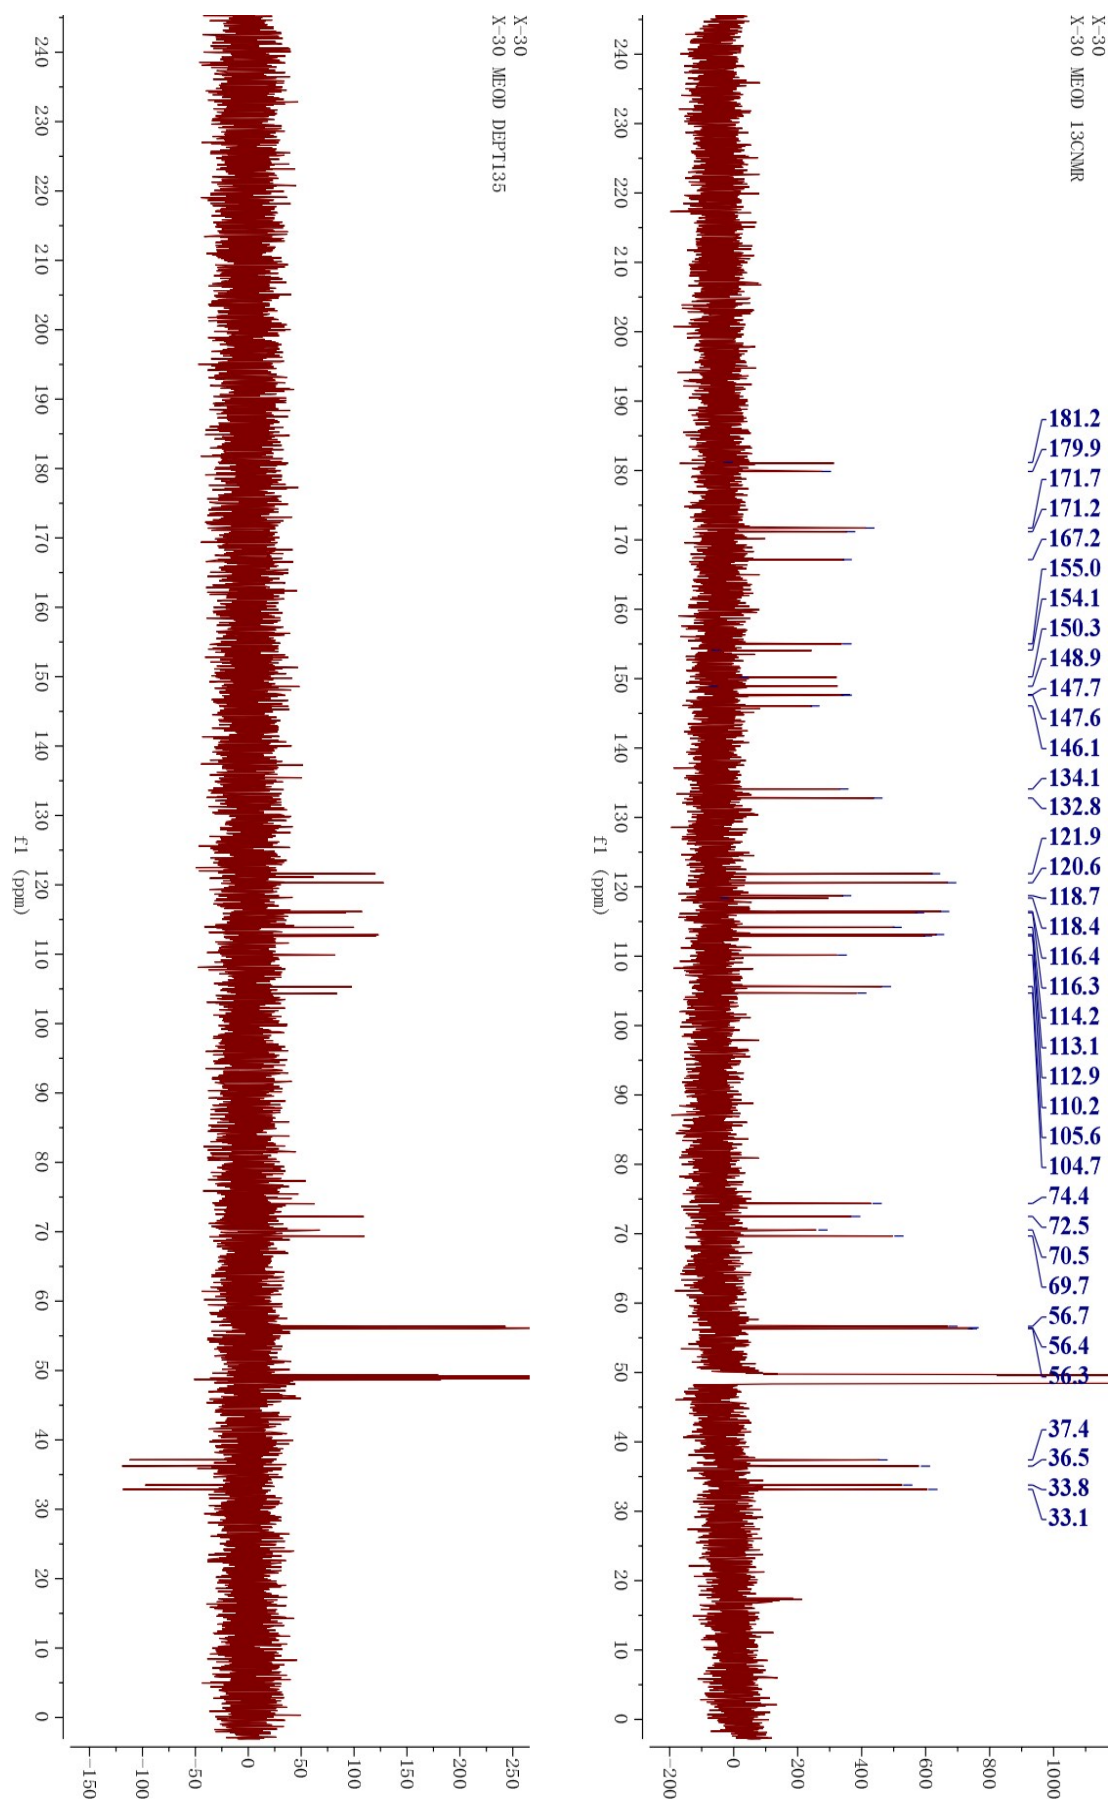

**Figure S82.**  $^{13}\text{C}$  NMR spectrum (125 MHz) of compound **11** in  $\text{CD}_3\text{OD}$ .

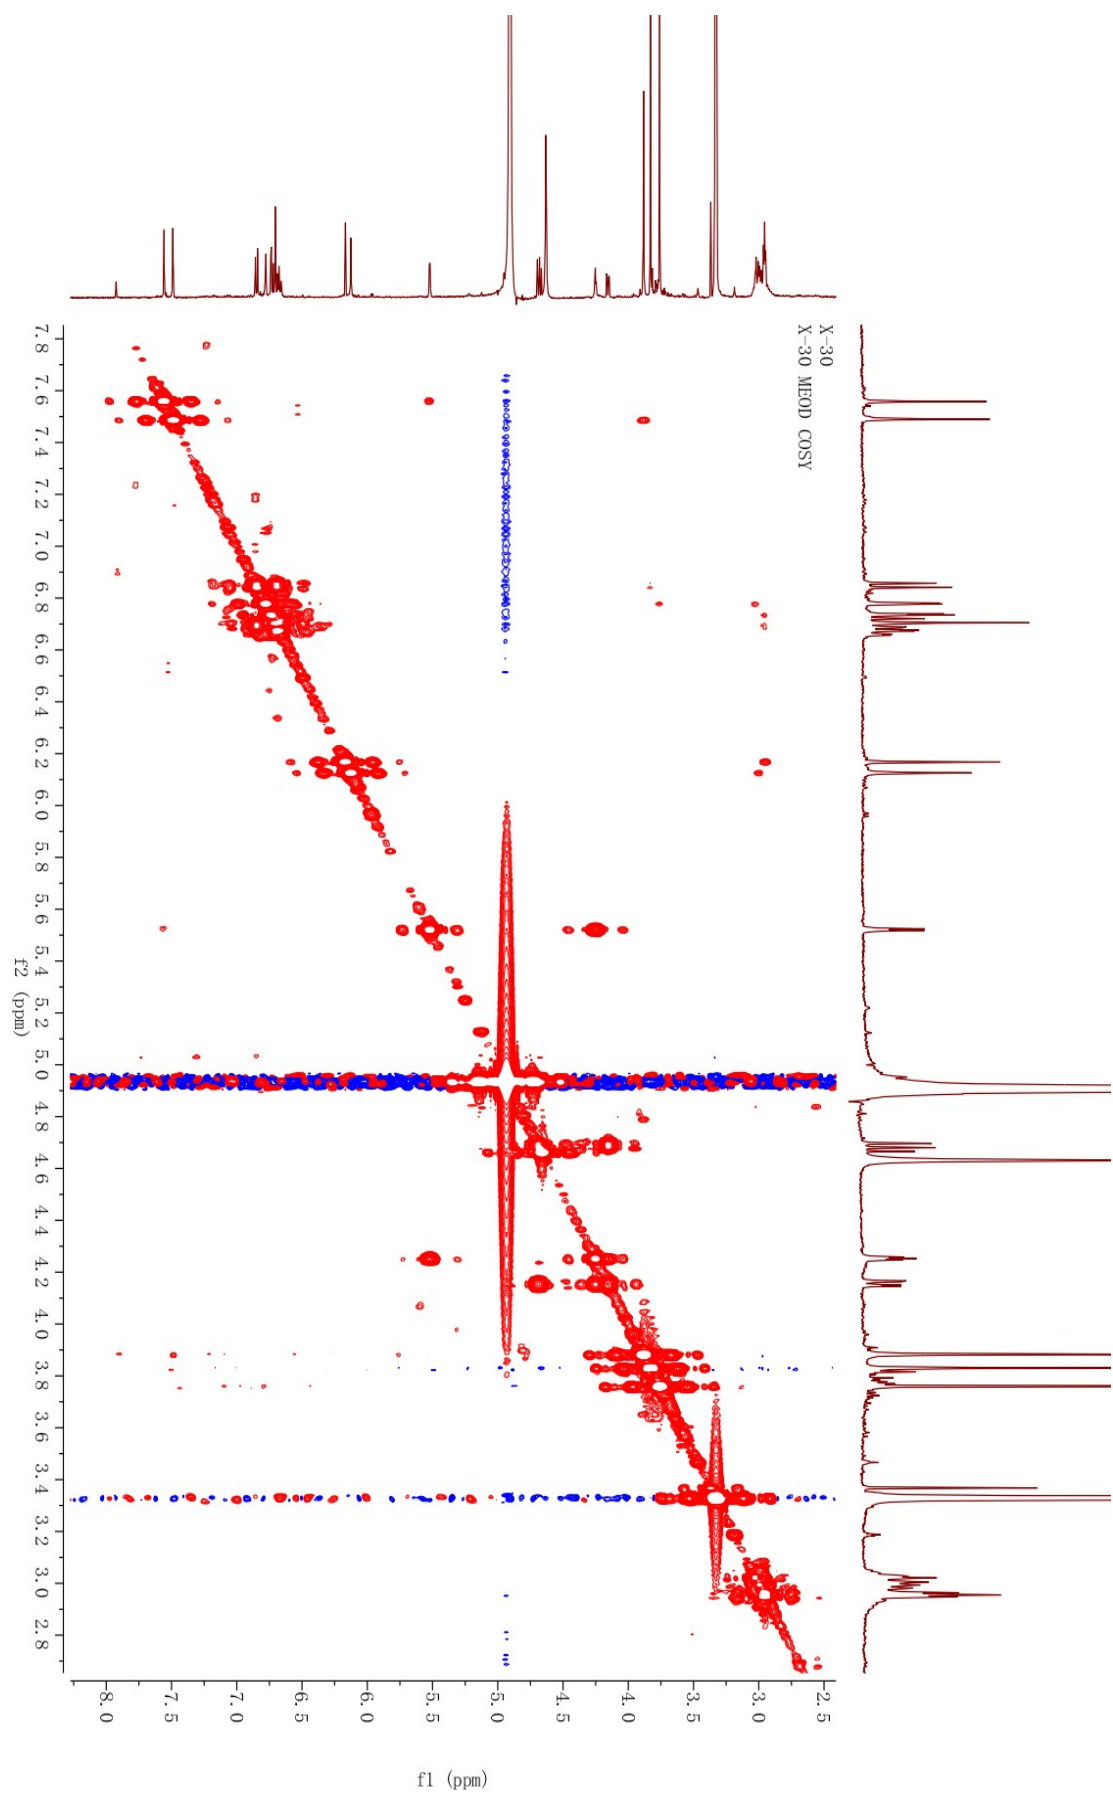

**Figure S83.**  $^1\text{H}$ - $^1\text{H}$  COSY spectrum of compound **11** in  $\text{CD}_3\text{OD}$ .

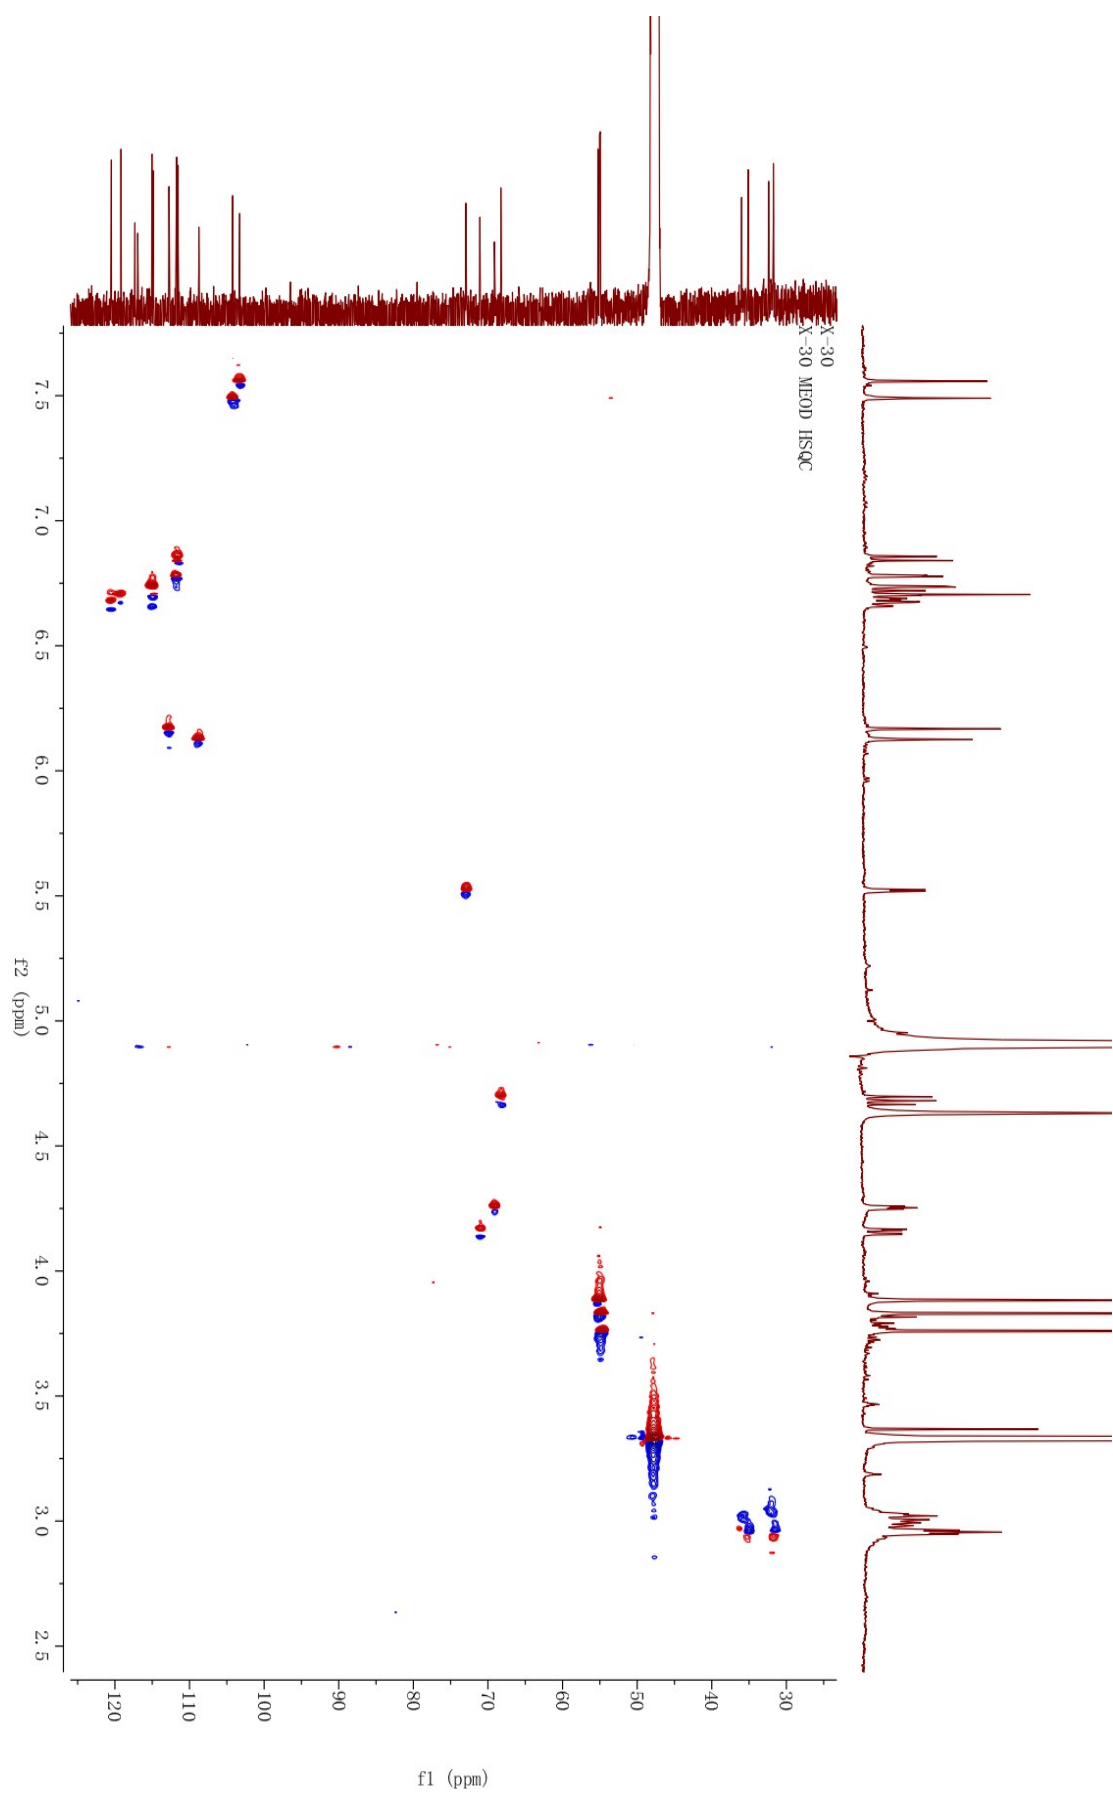

**Figure S84.** HSQC spectrum of compound **11** in CD<sub>3</sub>OD.



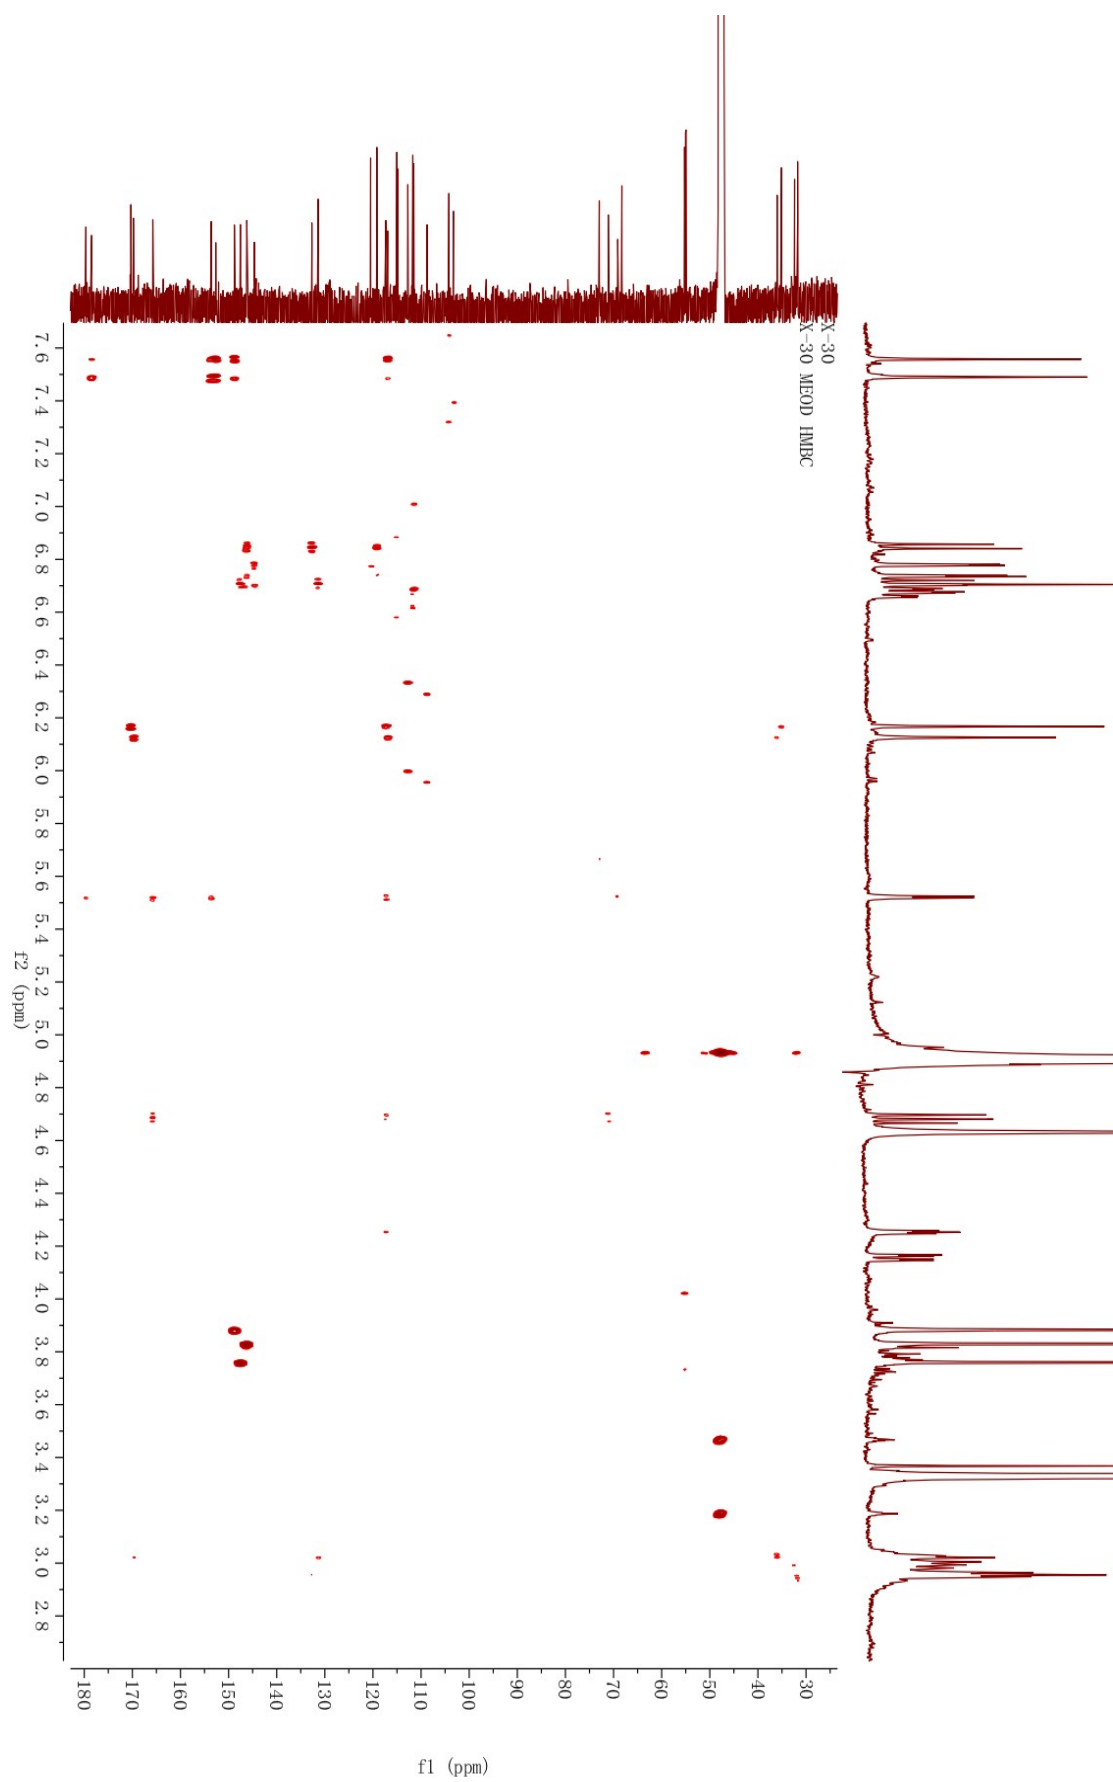

**Figure S85.** HMBC spectrum of compound **11** in CD<sub>3</sub>OD.

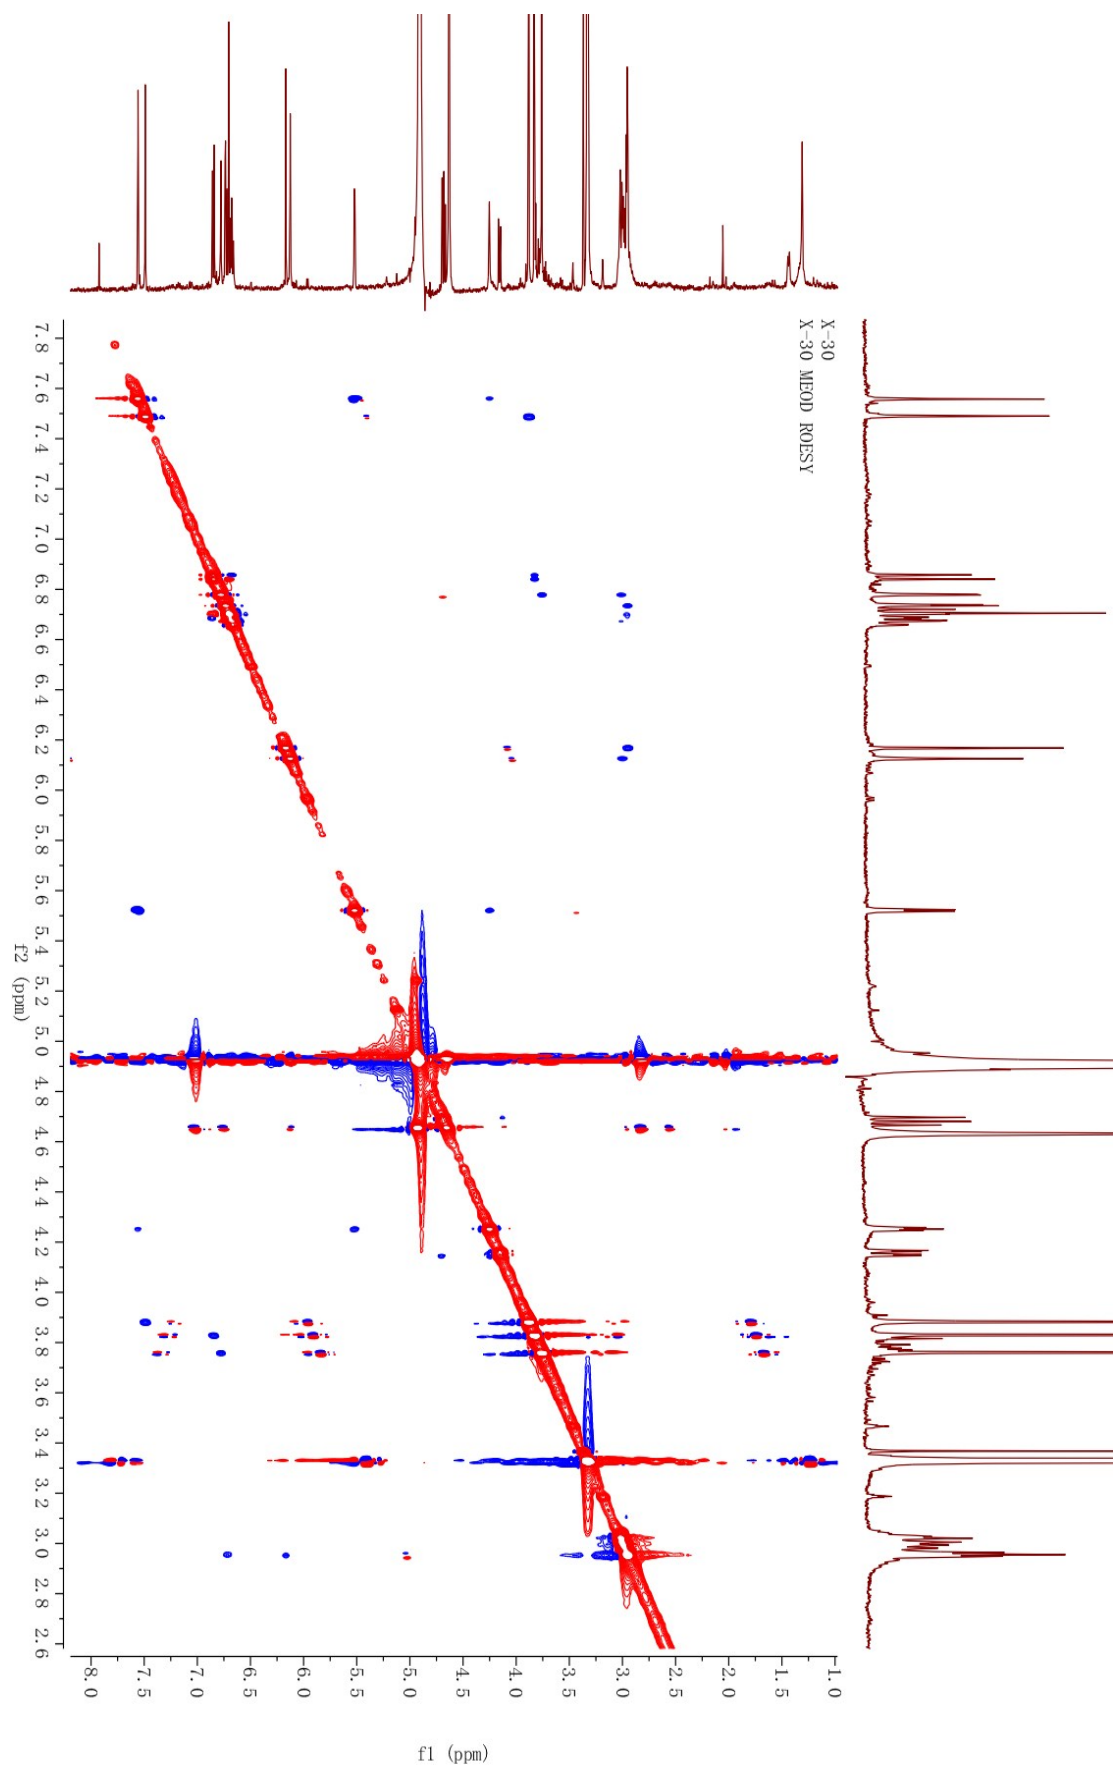

**Figure S86.** ROESY spectrum of compound 11 in CD<sub>3</sub>OD.

## Mass Spectrum SmartFormula Report

### Analysis Info

Analysis Name D:\Data\A501\Wanghui\X-30.d  
 Method DirectInfusion - MS - positive.m  
 Sample Name kfd-6-25  
 Comment

Acquisition Date 2017-12-15 18:27:54  
 Operator Demo User  
 Instrument compact 8255754.20158

### Acquisition Parameter

|             |            |                      |          |                  |           |
|-------------|------------|----------------------|----------|------------------|-----------|
| Source Type | ESI        | Ion Polarity         | Positive | Set Nebulizer    | 0.4 Bar   |
| Focus       | Not active | Set Capillary        | 4500 V   | Set Dry Heater   | 180 °C    |
| Scan Begin  | 50 m/z     | Set End Plate Offset | -500 V   | Set Dry Gas      | 4.0 l/min |
| Scan End    | 1300 m/z   | Set Charging Voltage | 2000 V   | Set Divert Valve | Source    |
|             |            | Set Corona           | 0 nA     | Set APCI Heater  | 0 °C      |

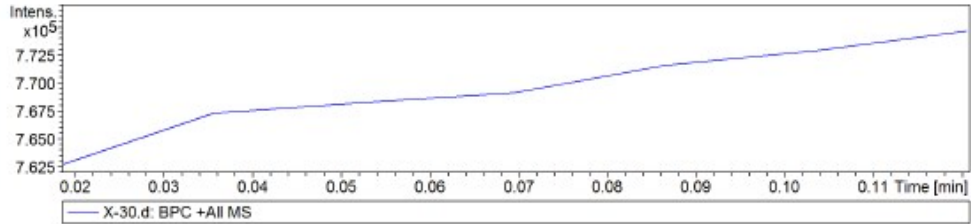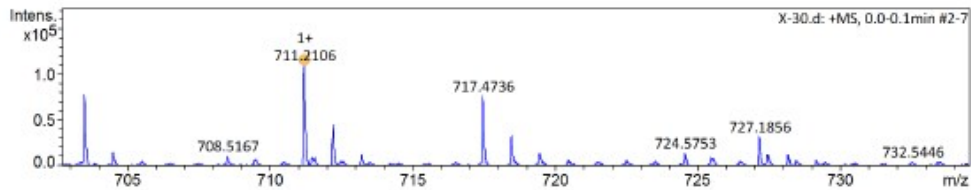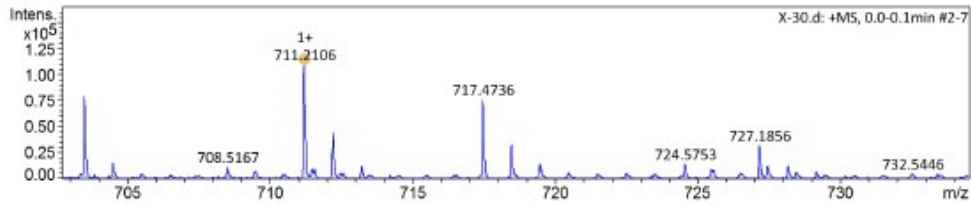

| Meas. m/z  | # | Ion Formula | Score  | m/z        | err [mDa] | err [ppm] | mSigma | rdb  | e <sup>-</sup> Conf | Adduct |
|------------|---|-------------|--------|------------|-----------|-----------|--------|------|---------------------|--------|
| 711.210592 | 1 | C37H38NaO13 | 100.00 | 711.204812 | -5.8      | -8.1      | 3.2    | 20.0 | even                | M+Na   |

X-30.d

Bruker Compass DataAnalysis 4.4

printed: 2019-02-14 09:34:51

by: demo

Page 1 of 1

**Figure S87.** HRESIMS spectrum of compound **11**.

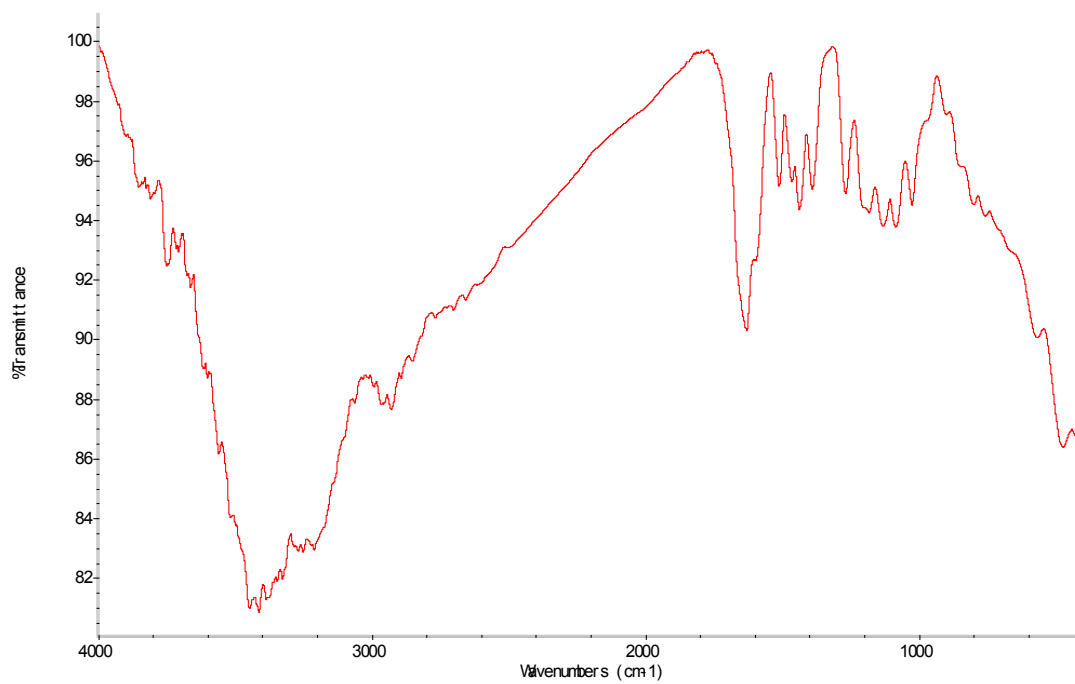

**Figure S88.** IR spectrum of compound **11**.
